# Supplementary material for: Synthesis of 7-amino-6-halogeno-3-phenylquinoxaline-2-carbonitrile 1,4-dioxides: a way forward for targeting hypoxia and drug resistance of cancer cells
Source: Royal Society of Chemistry journal article supplement (doi:10.1039/d1ra07978f), 2021-01-01
Supplement: d1ra07978f1.pdf [file d1ra07978f1.pdf]

## Supplementary Information

### Synthesis of 7-amino-6-halogeno-3-phenylquinoxaline-2-carbonitrile 1,4-dioxides: A way forward for targeting hypoxia and drug resistance of cancer cells

Galina I. Buravchenko <sup>a,b</sup>, Alexander M. Scherbakov <sup>c</sup>, Lyubov G. Dezhenkova <sup>a</sup>, Lianet Monzote <sup>d</sup>,  
Andrey E. Shchekotikhin <sup>a,\*</sup>

<sup>a</sup> Gause Institute of New Antibiotics, 11 B. Pirogovskaya Street, Moscow 119021, Russia

<sup>b</sup> Mendeleev University of Chemical Technology, 9 Miusskaya Square, Moscow 125190, Russia

<sup>c</sup> Blokhin National Medical Research Center of Oncology, 24 Kashirskoye sh., Moscow 115522, Russia

<sup>d</sup> Department of Parasitology, Pedro Kouri Tropical Medicine Institute, Havana, Cuba

\* Corresponding author:

Andrey E. Shchekotikhin e-mail: [shchekotikhin@mail.ru](mailto:shchekotikhin@mail.ru)

#### Legends to Figures and Tables

|                                                                                                                                             |            |
|---------------------------------------------------------------------------------------------------------------------------------------------|------------|
| <b>Figure S1-S65, Table S1.</b> <sup>1</sup> H and <sup>13</sup> C NMR spectra of new compounds.                                            | <b>S2</b>  |
| <b>Figure S71-S104.</b> Copies of HRMS ESI spectra.                                                                                         | <b>S38</b> |
| <b>Figure S105-S116.</b> Copies of HPLC analysis.                                                                                           | <b>S72</b> |
| <b>Table S2.</b> Experimental parameters of aqueous solubility (pH=7) of some derivatives <b>4a-c</b> , <b>13a</b> and <b>14a</b> at 23 °C. | <b>S84</b> |

## Copies of NMR Spectra

Figure S1. Copy of  $^1\text{H}$  NMR spectrum of the derivative 6.

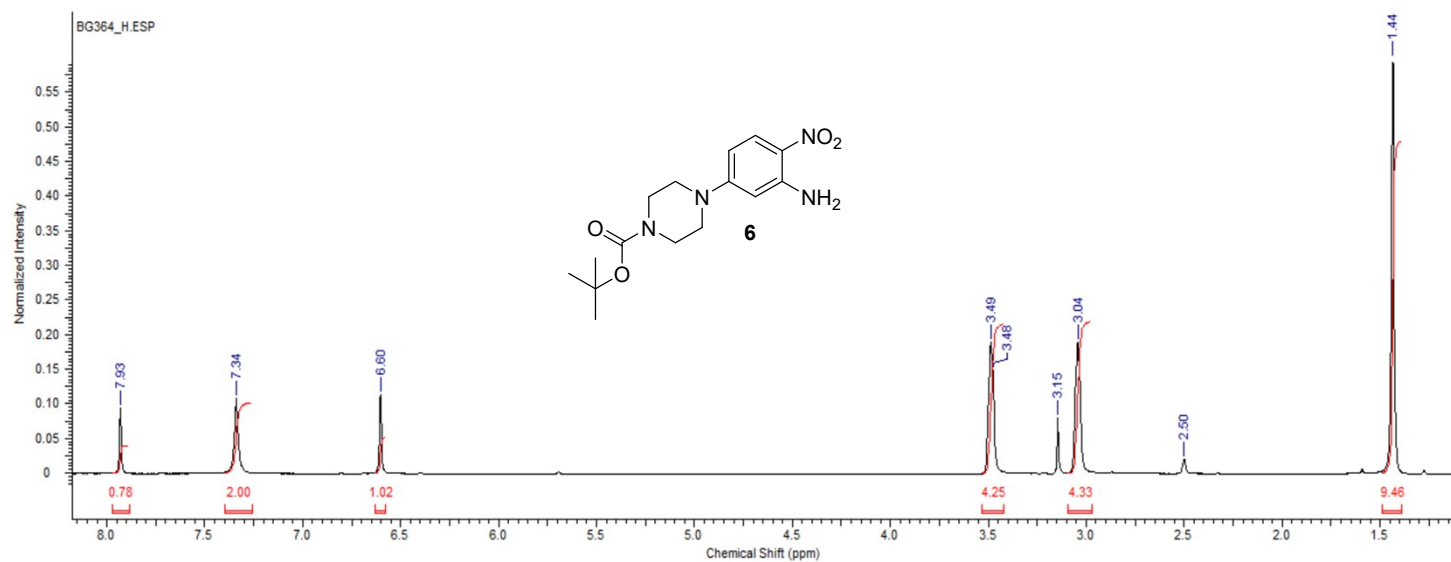

Figure S2. Copy of  $^{13}\text{C}$  NMR spectrum of the derivative 6.

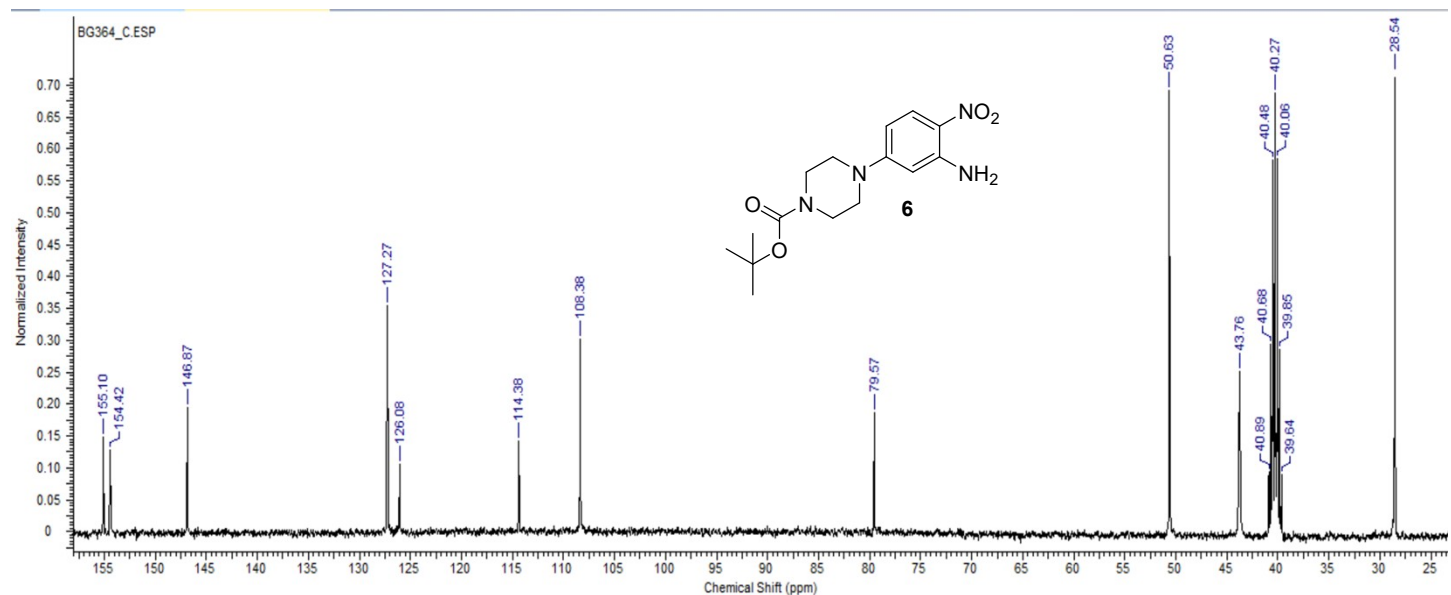

Figure S3. Copy of  $^1\text{H}$  NMR spectrum of the derivative 7.

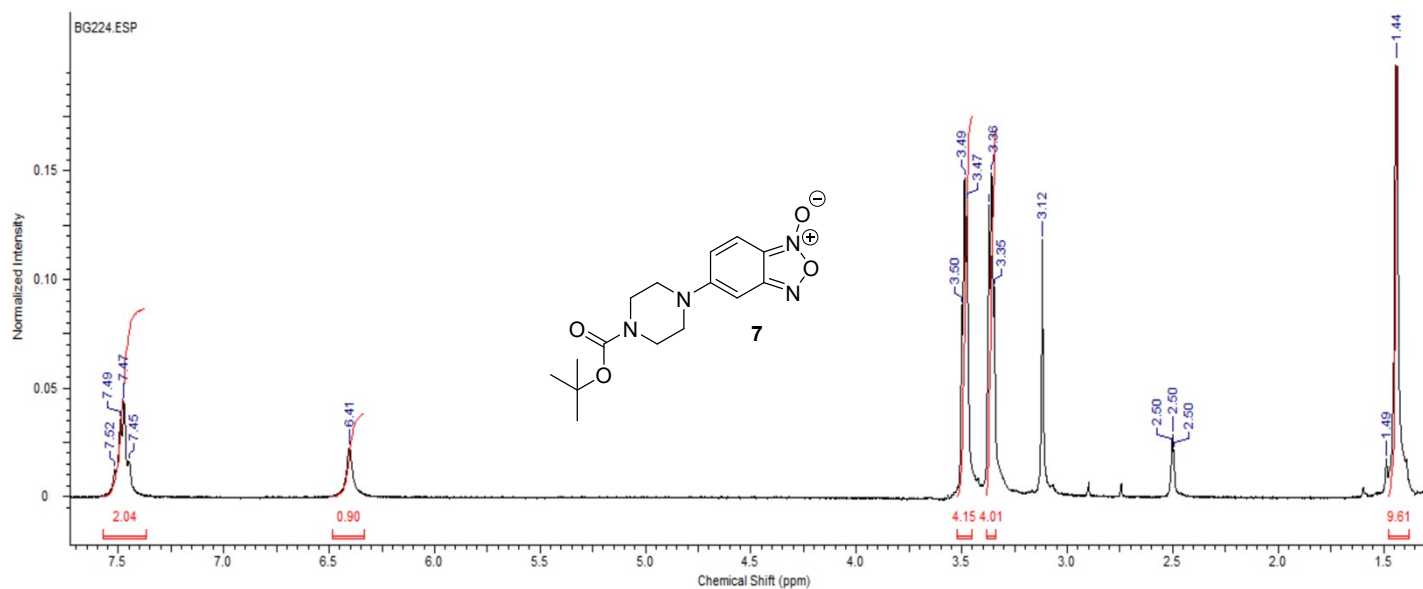

Figure S4. Copy of  $^{13}\text{C}$  NMR spectrum of the derivative 7.

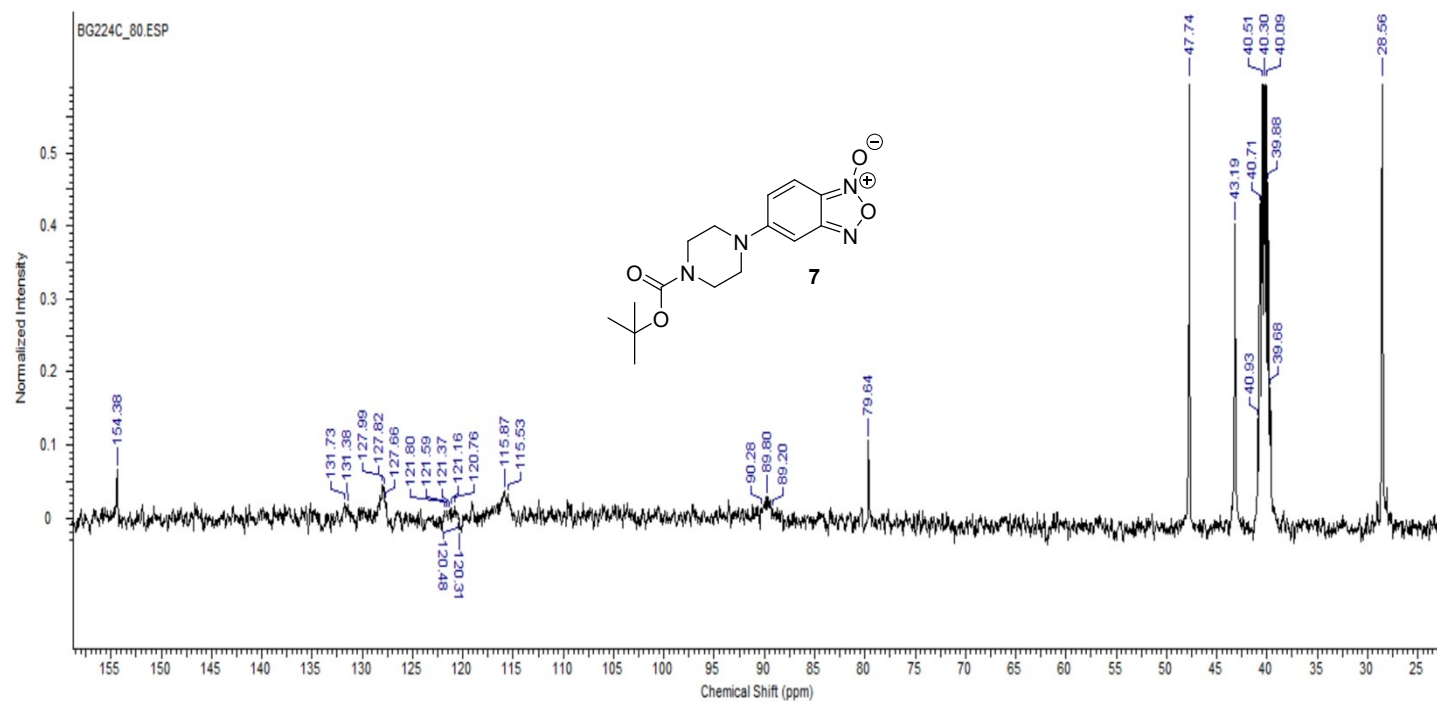

Figure S5. Copy of  $^1\text{H}$  NMR spectrum of the derivative **9a**.

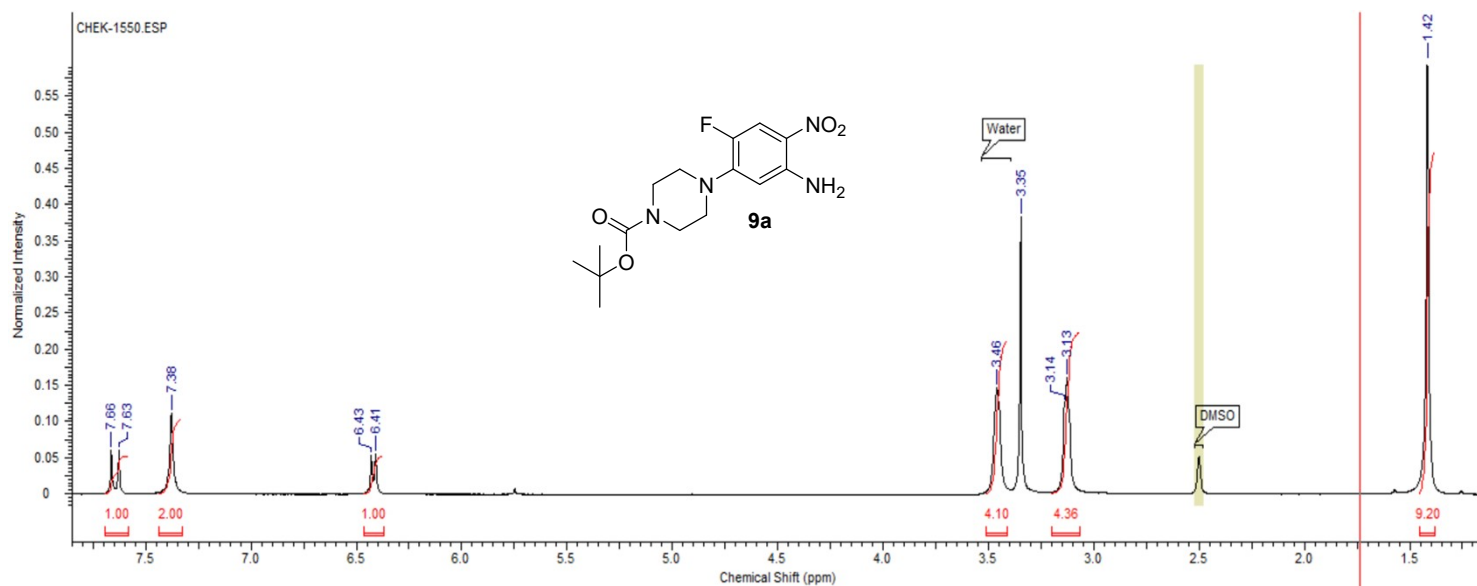

Figure S6. Copy of  $^{13}\text{C}$  NMR spectrum of the derivative **9a**.

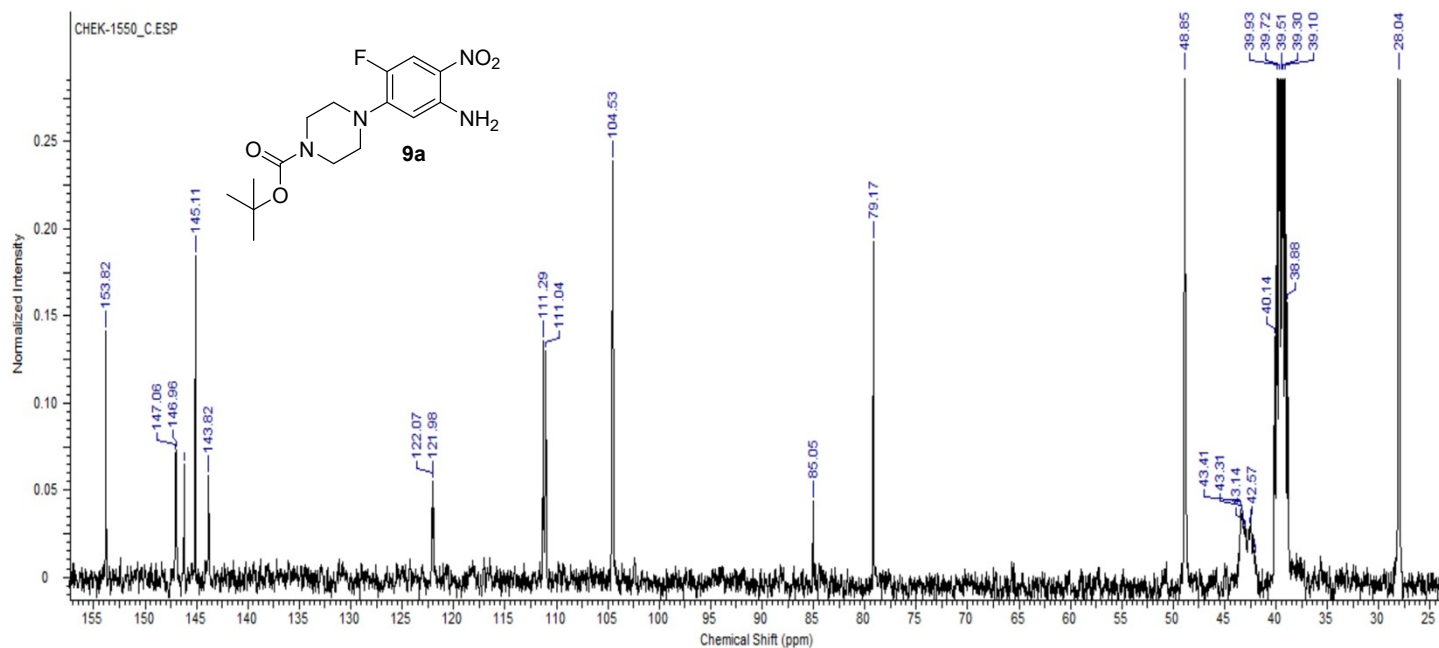

Figure S7. Copy of  $^1\text{H}$  NMR spectrum of the derivative **9b**.

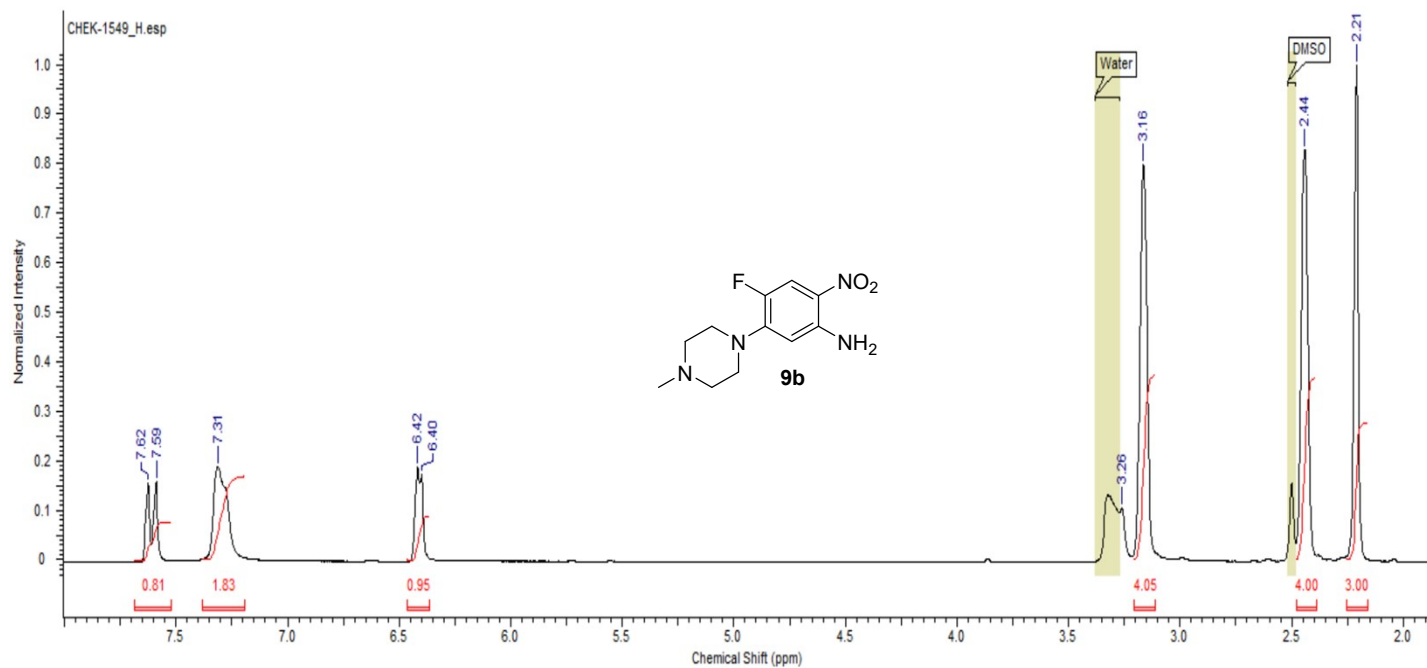

Figure S8. Copy of  $^{13}\text{C}$  NMR spectrum of the derivative **9b**.

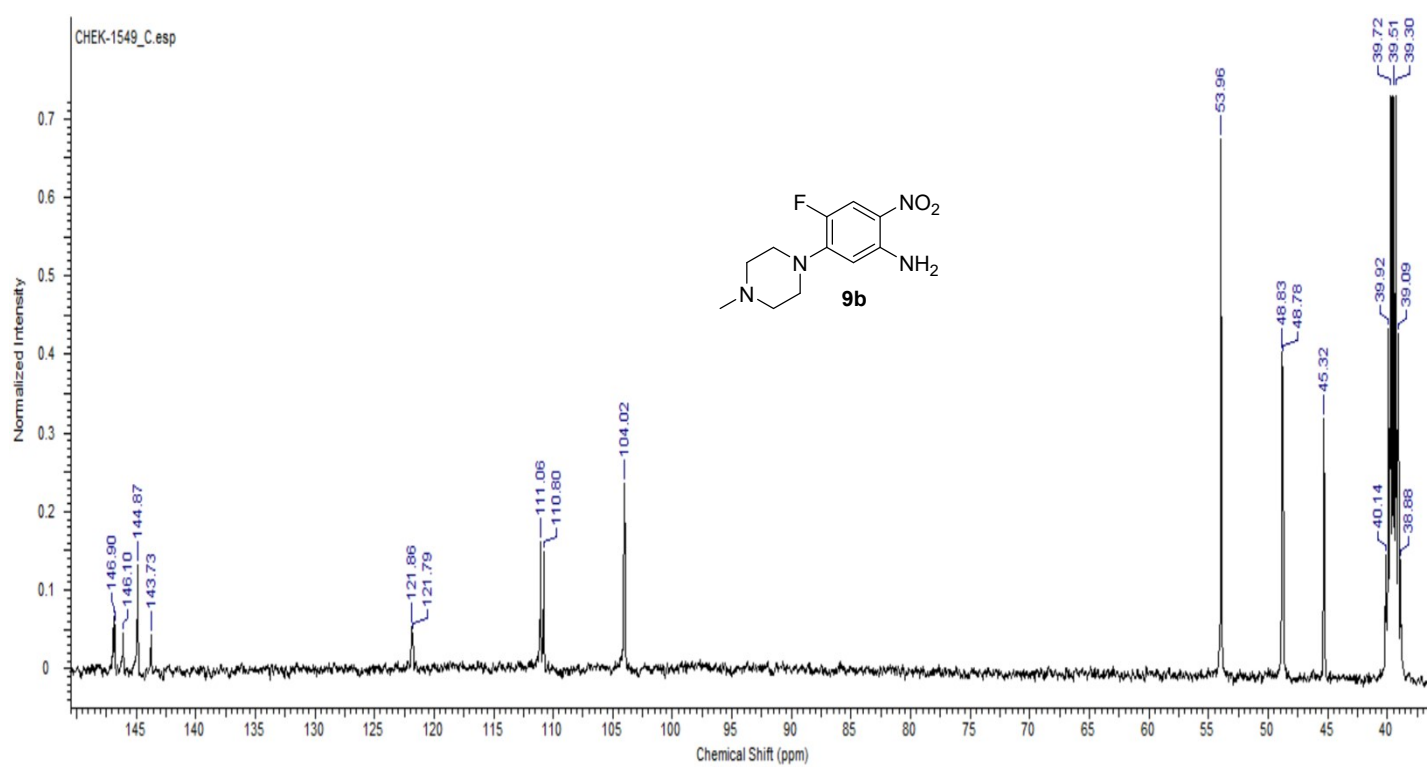

Figure S9. Copy of  $^1\text{H}$  NMR spectrum of the derivative **9c**.

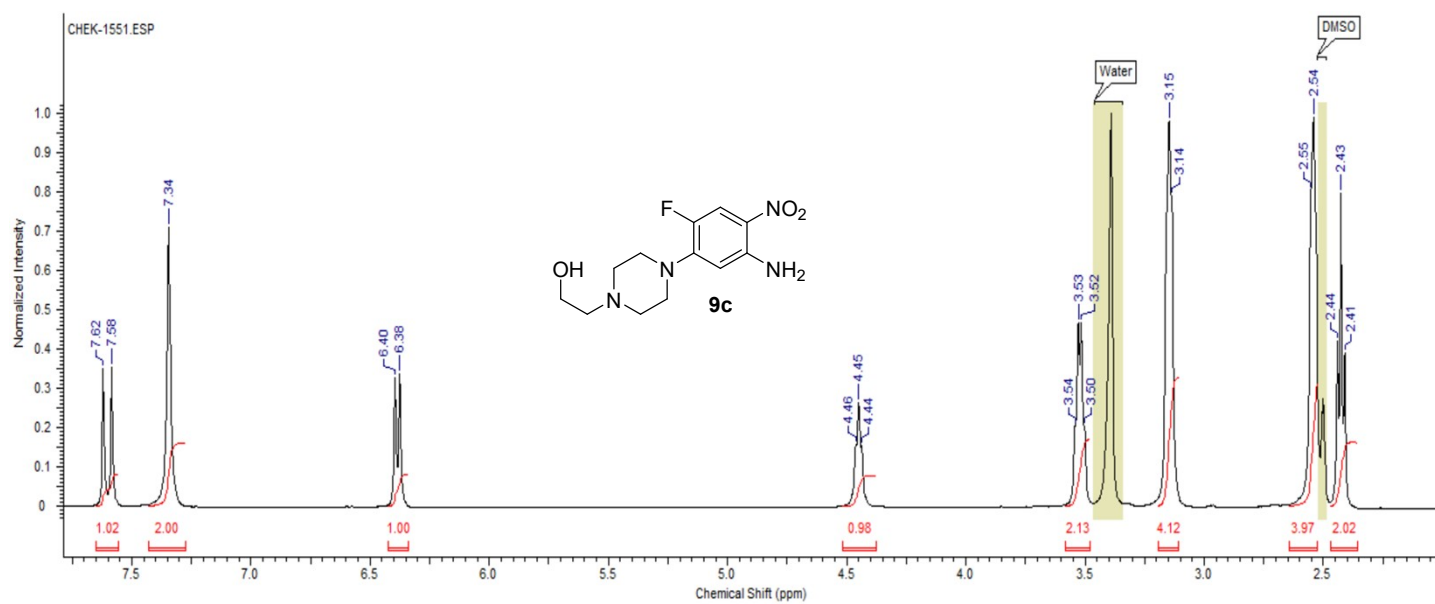

Figure S10. Copy of  $^{13}\text{C}$  NMR spectrum of the derivative **9c**.

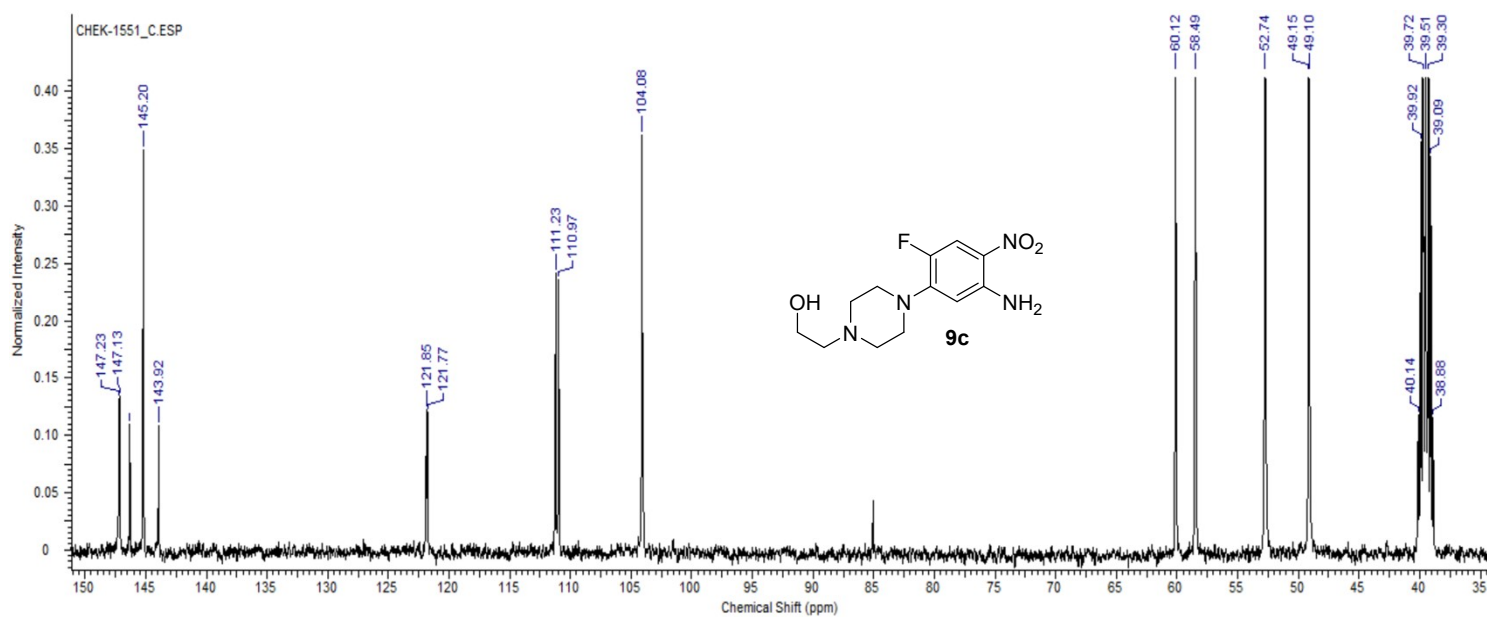

Figure S11. Copy of  $^1\text{H}$  NMR spectrum of the derivative **9d**.

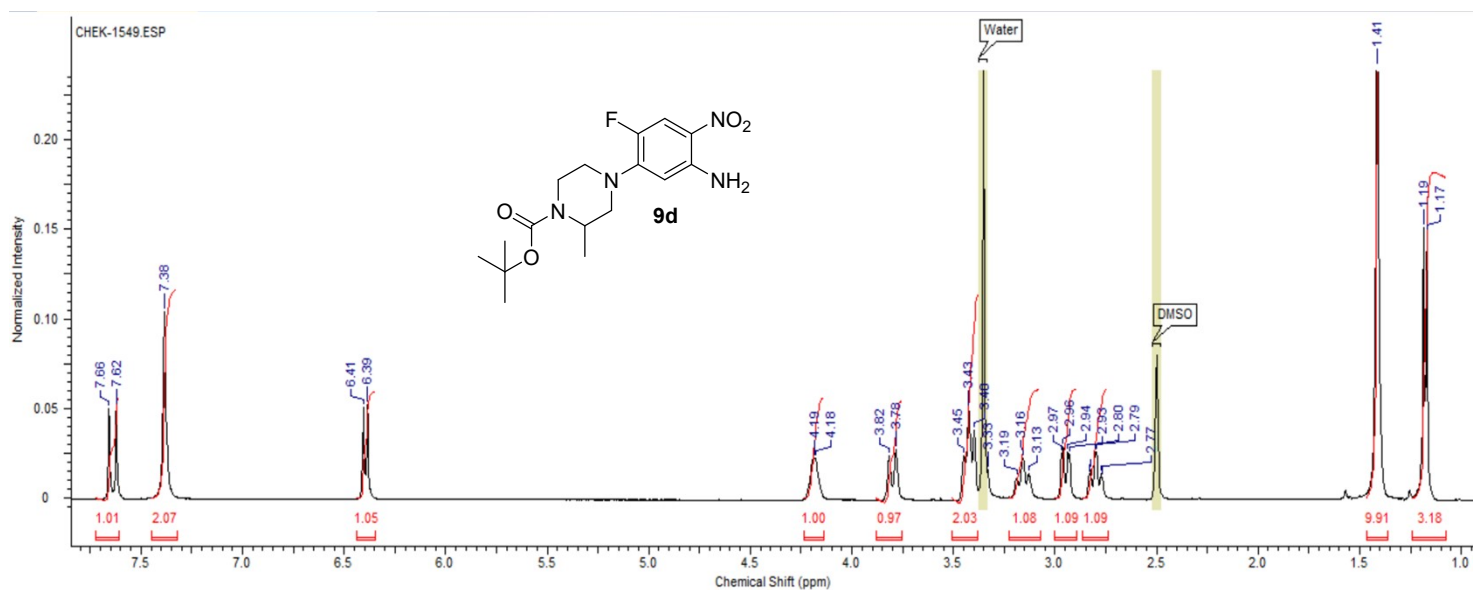

Figure S12. Copy of  $^{13}\text{C}$  NMR spectrum of the derivative **9d**.

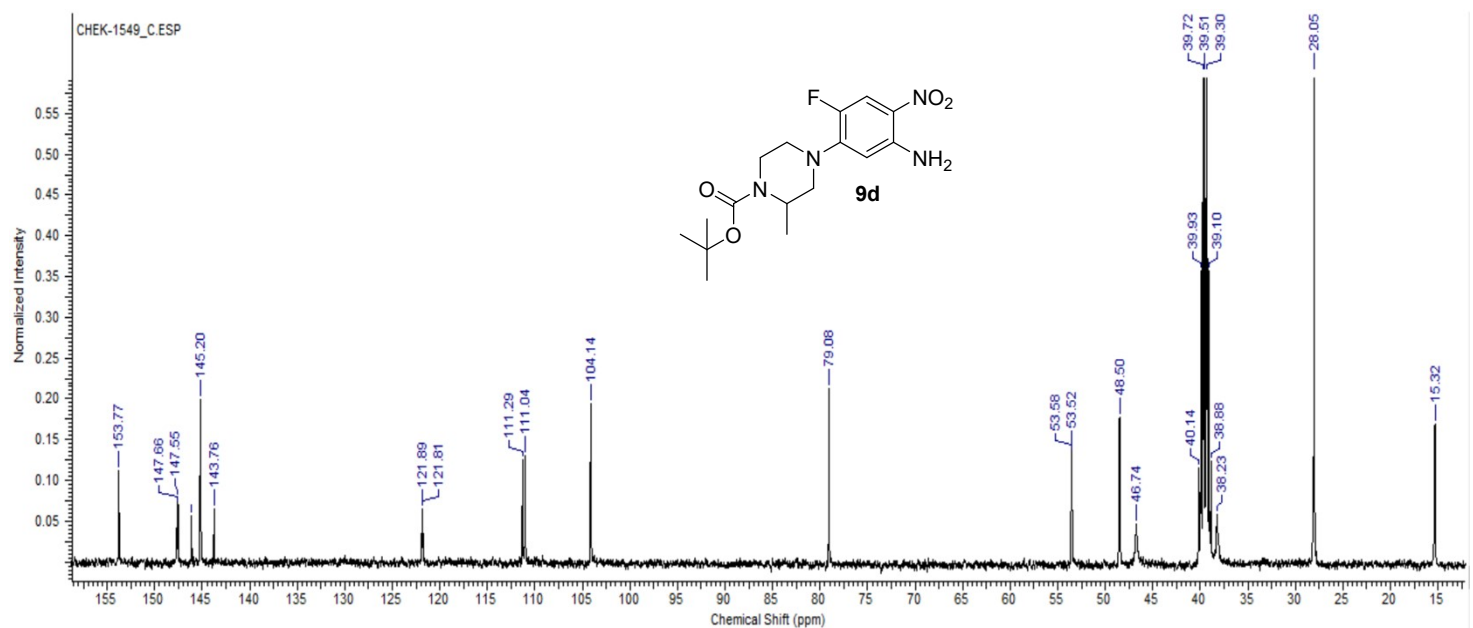

Figure S13. Copy of  $^1\text{H}$  NMR spectrum of the derivative **9e**.

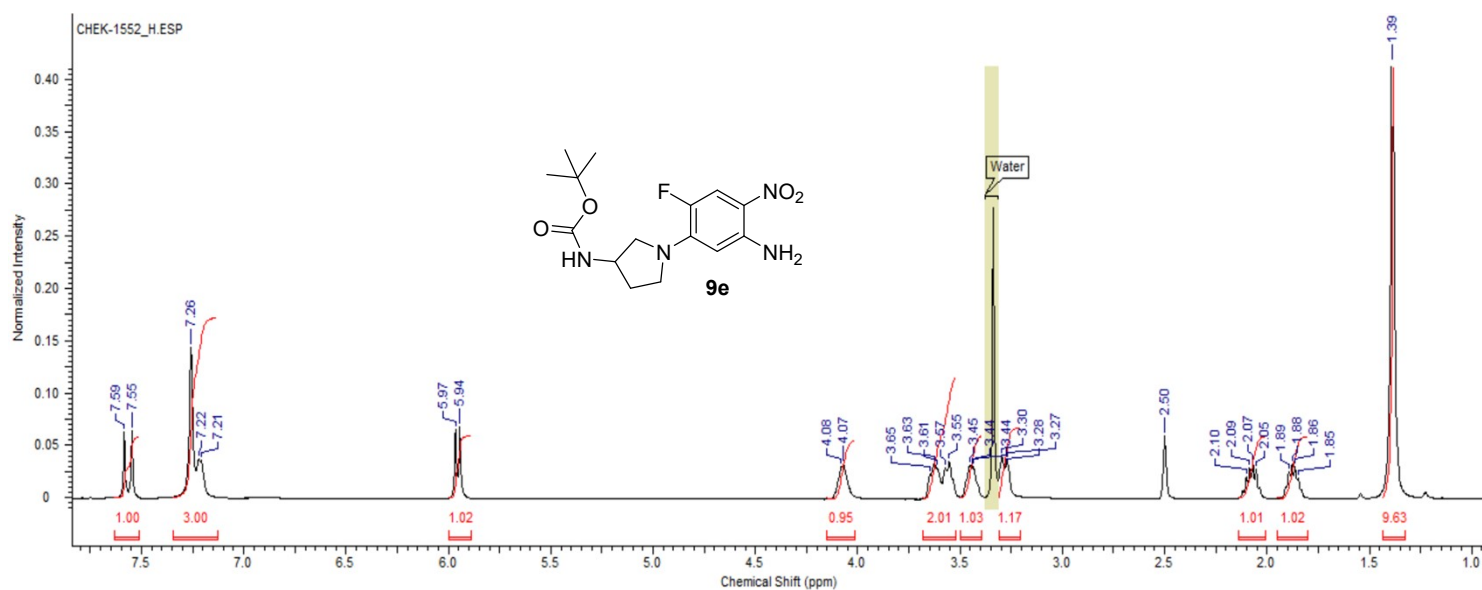

Figure S14. Copy of  $^{13}\text{C}$  NMR spectrum of the derivative **9e**.

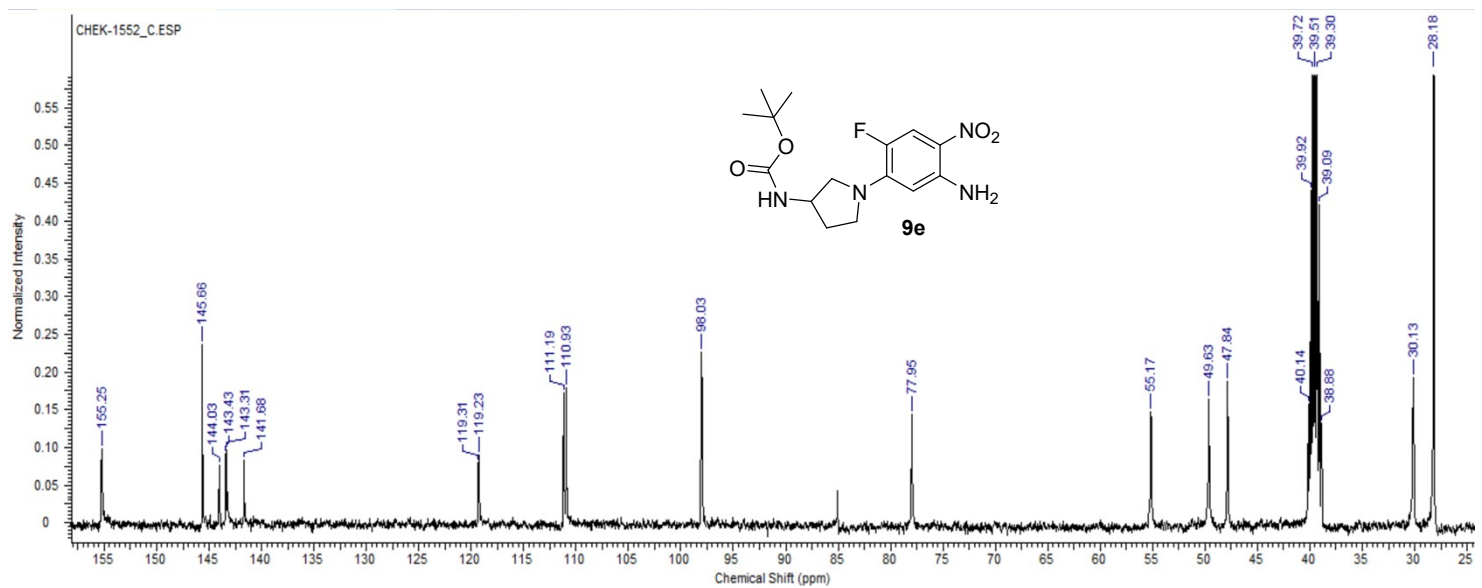



Figure S15. Copy of  $^1\text{H}$  NMR spectrum of the derivative **9f**

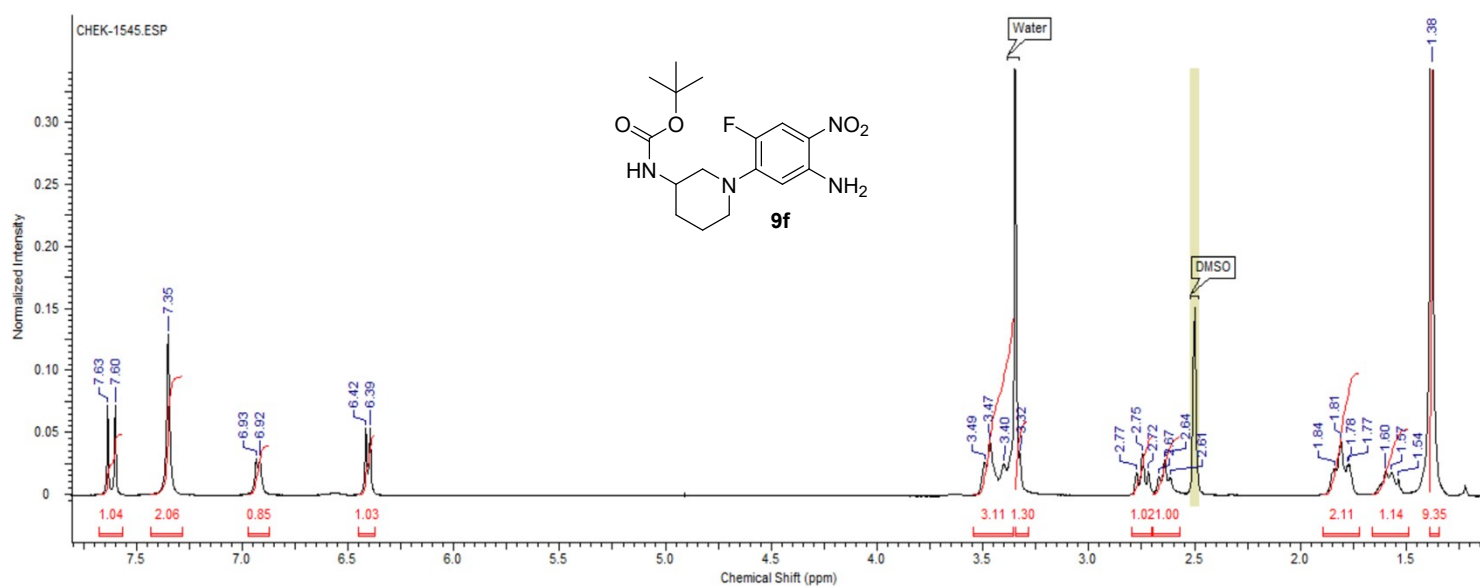

Figure S16. Copy of  $^{13}\text{C}$  NMR spectrum of the derivative **9f**.

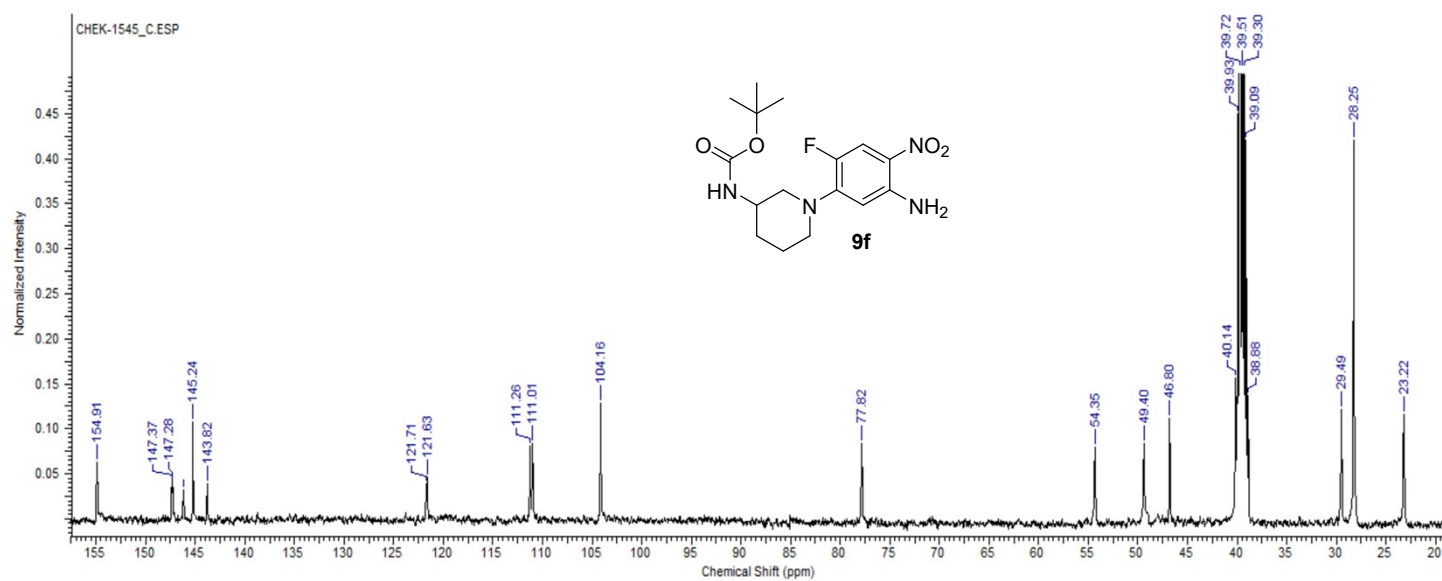

Figure S17. Copy of  $^1\text{H}$  NMR spectrum of the derivative **9g**.

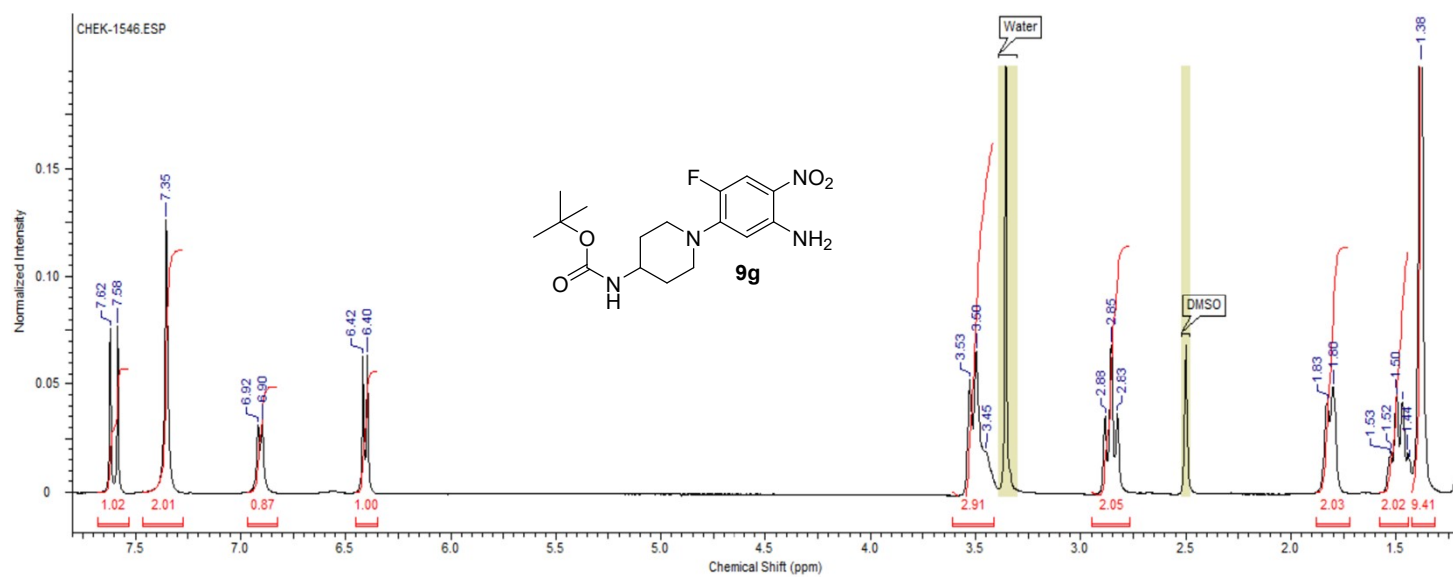

Figure S18. Copy of  $^{13}\text{C}$  NMR spectrum of the derivative **9g**.

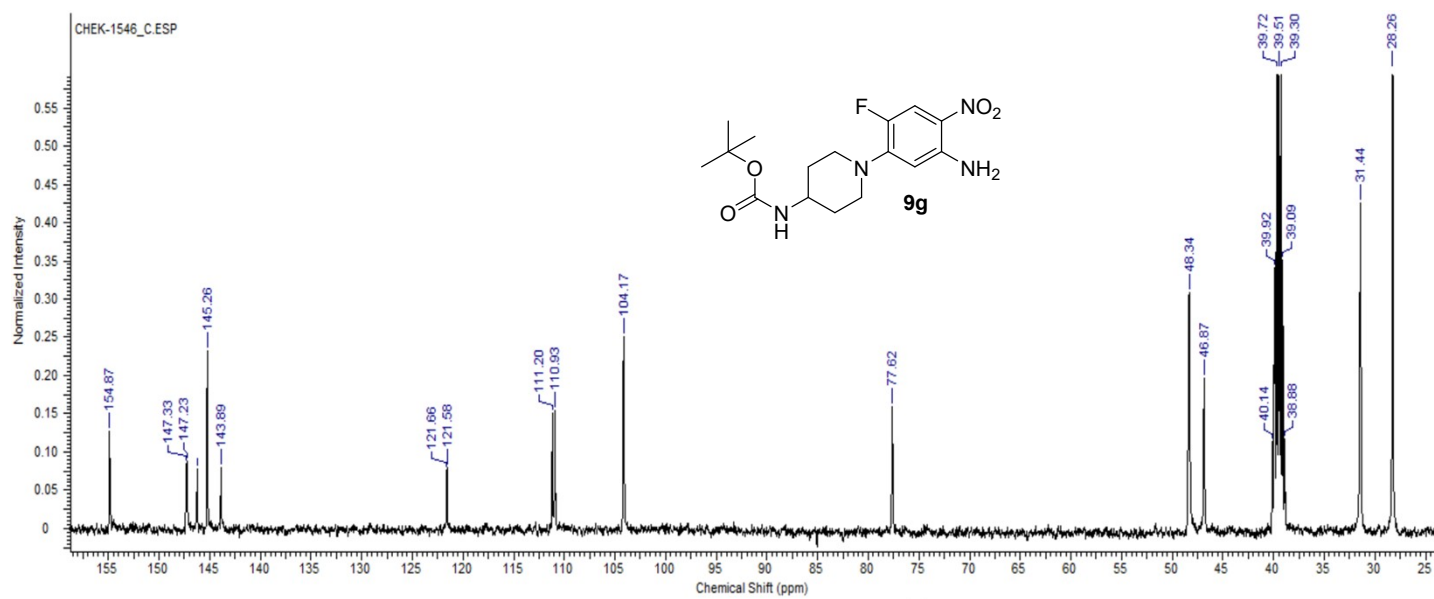

Figure S19. Copy of  $^1\text{H}$  NMR spectrum of the derivative **9h**.

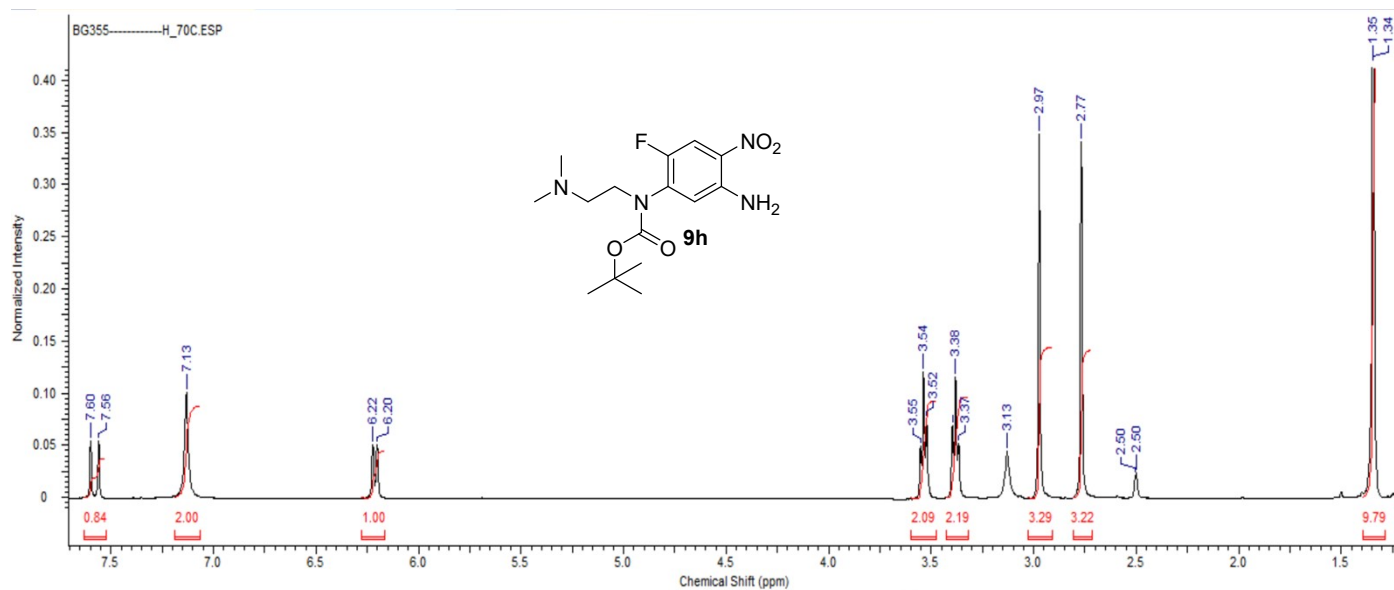

Figure S20. Copy of  $^{13}\text{C}$  NMR spectrum of the derivative **9h**.

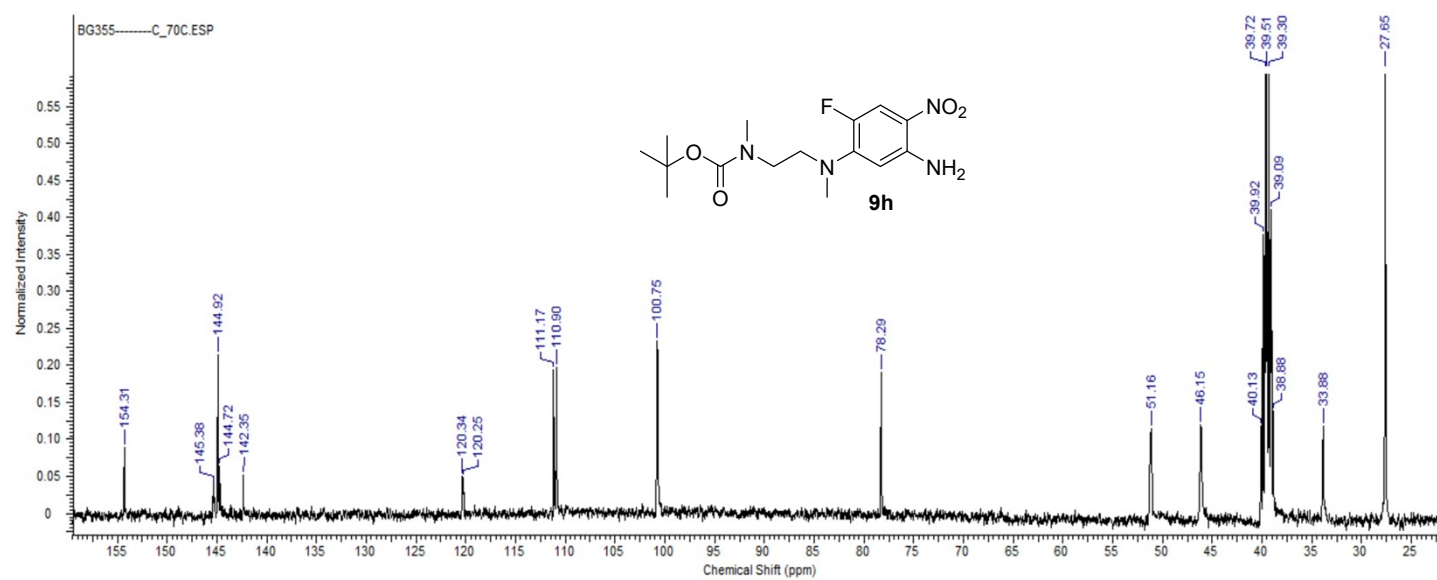

Figure S21. Copy of  $^1\text{H}$  NMR spectrum of the derivative **10a**.

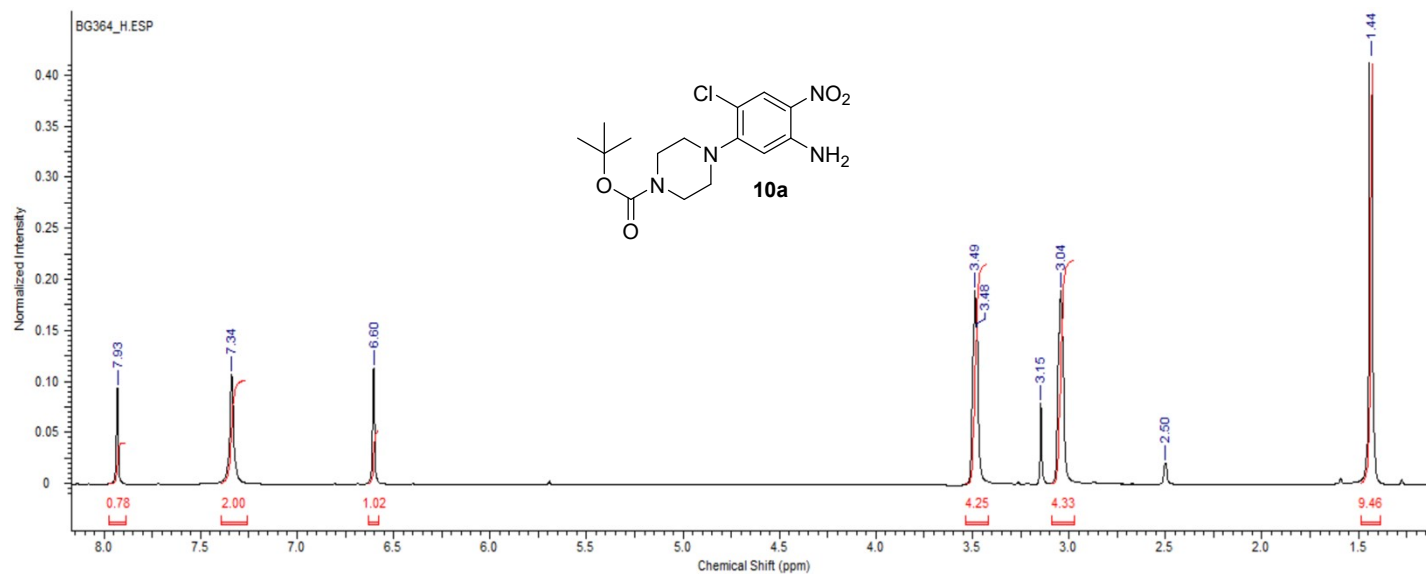

Figure S22. Copy of  $^{13}\text{C}$  NMR spectrum of the derivative **10a**.

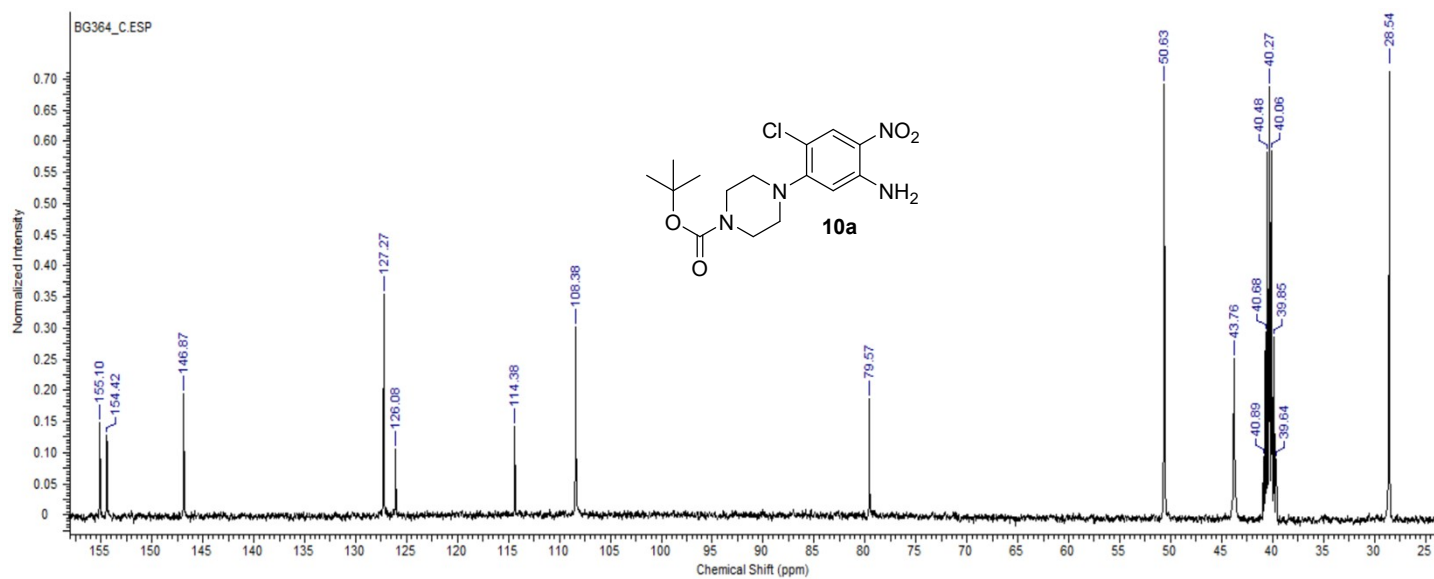

Figure S23. Copy of  $^1\text{H}$  NMR spectrum of the derivative **10g**.

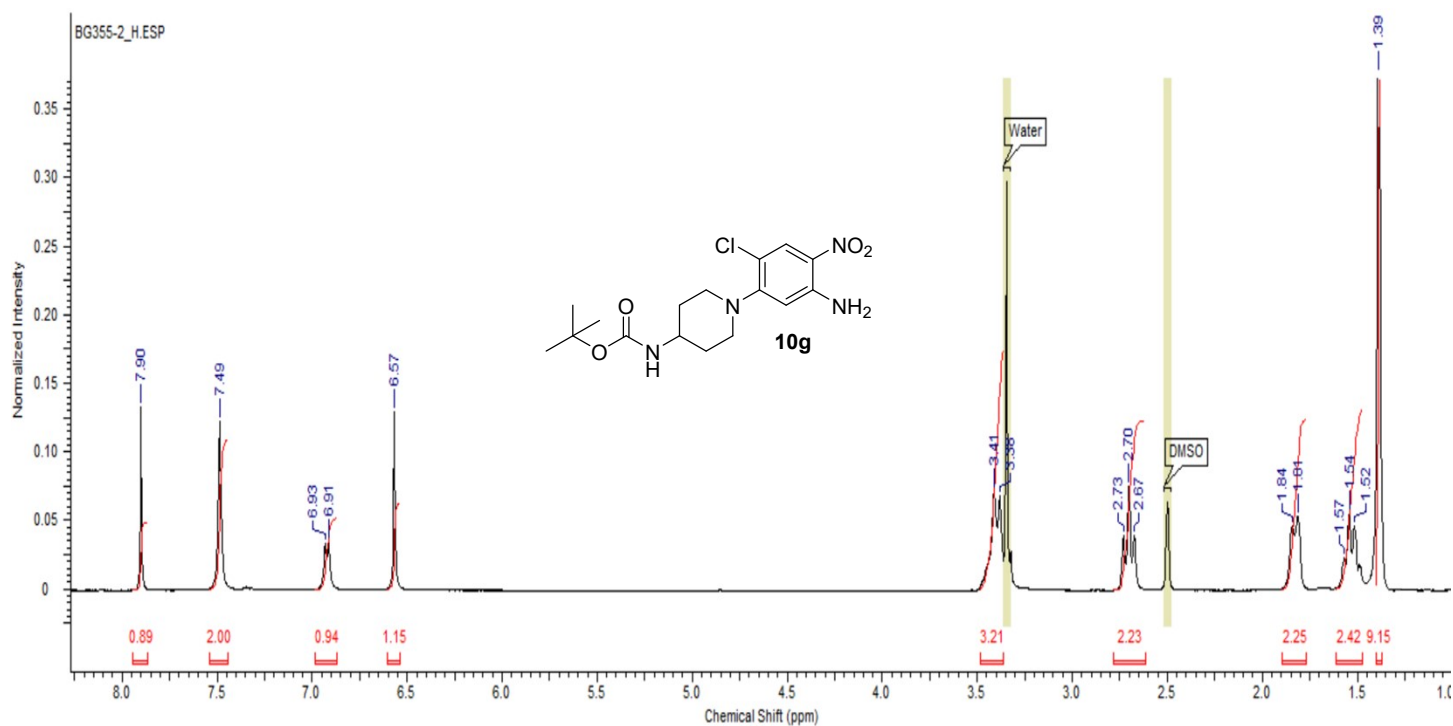

Figure S24. Copy of  $^{13}\text{C}$  NMR spectrum of the derivative **10g**.

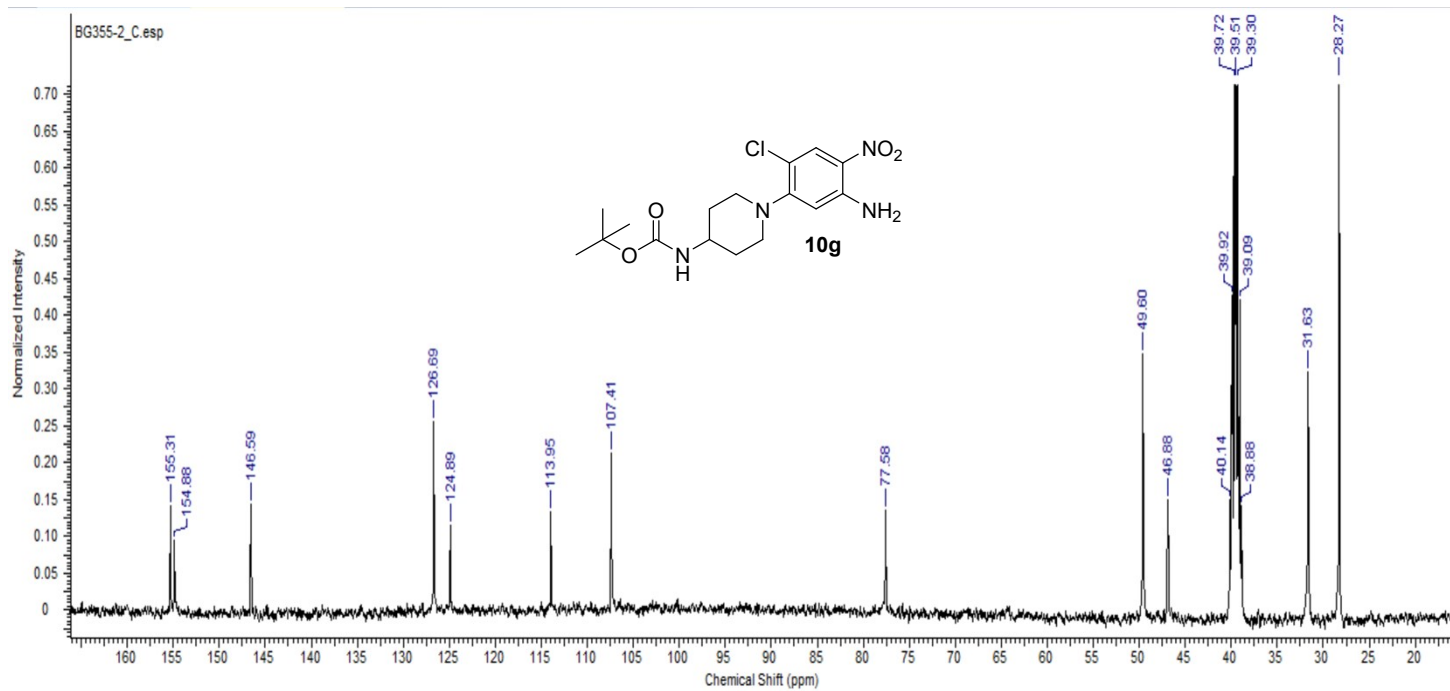

Figure S25. Copy of  $^1\text{H}$  NMR spectrum of the derivative **11a** at 25 °C.

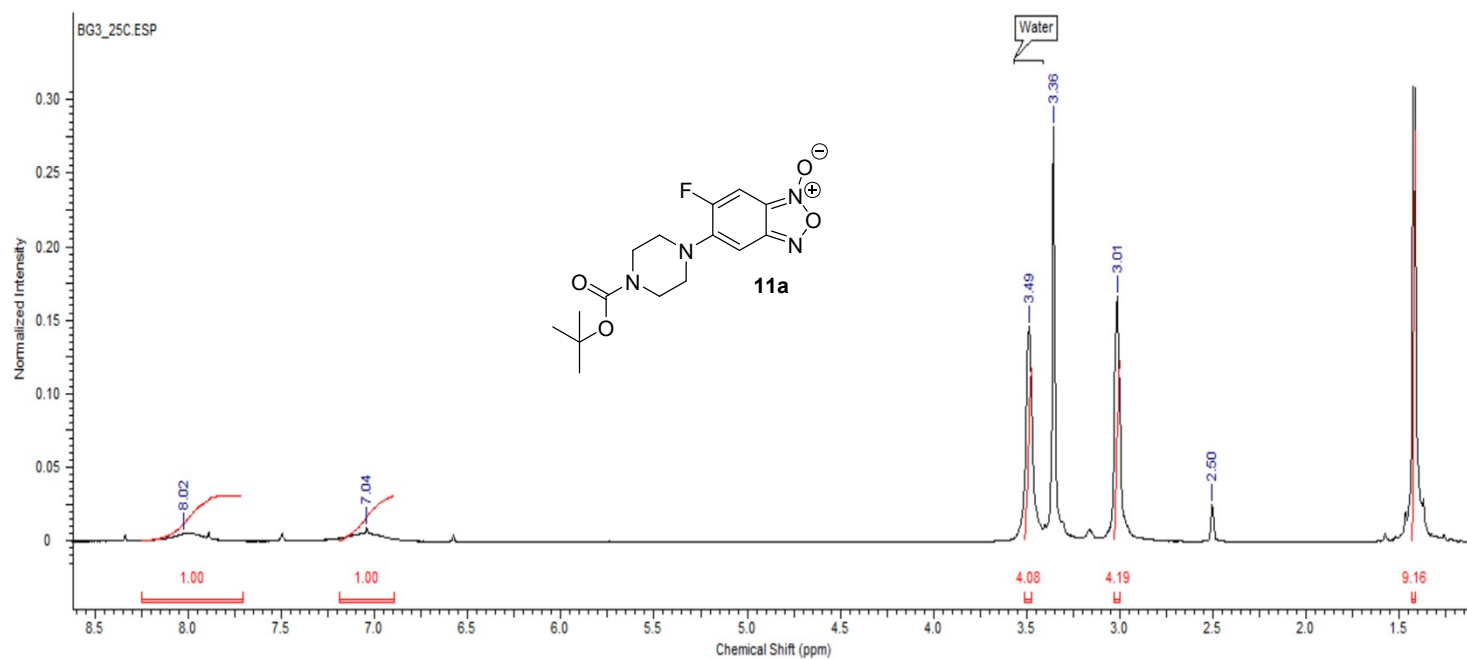

Figure S26. Copy of  $^{13}\text{C}$  NMR spectrum of the derivative **11a** at 25 °C.

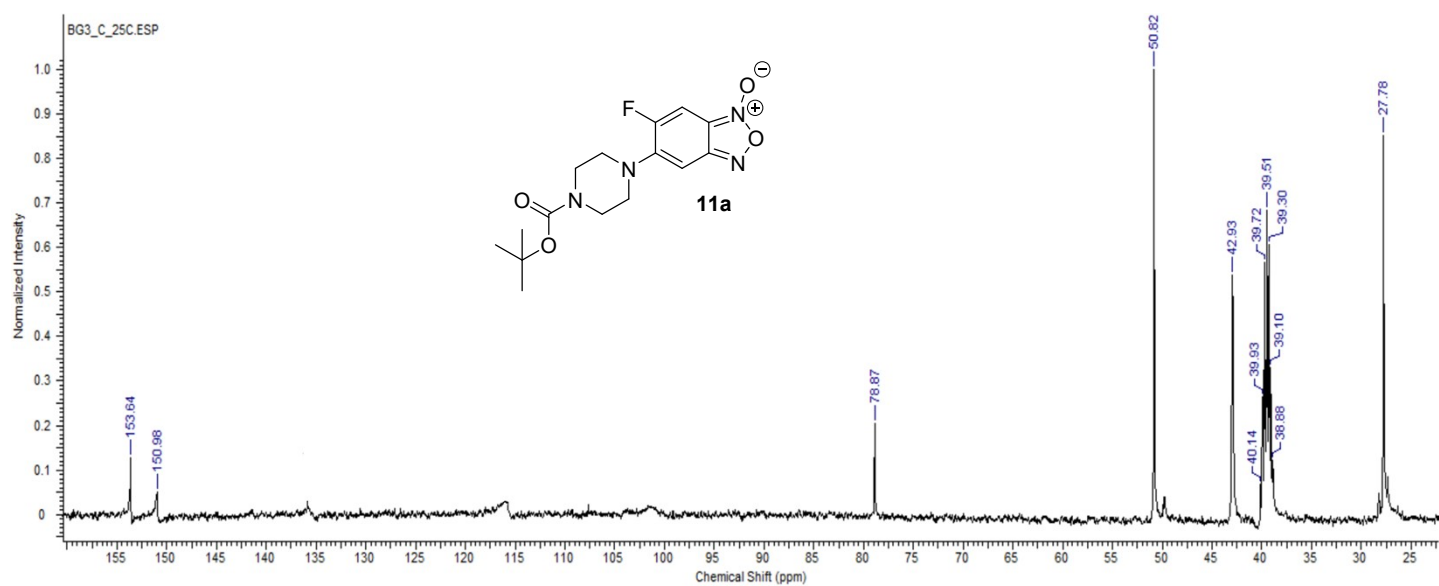

Figure S27. Copy of  $^1\text{H}$  NMR spectrum of the derivative **11a** at 75 °C.

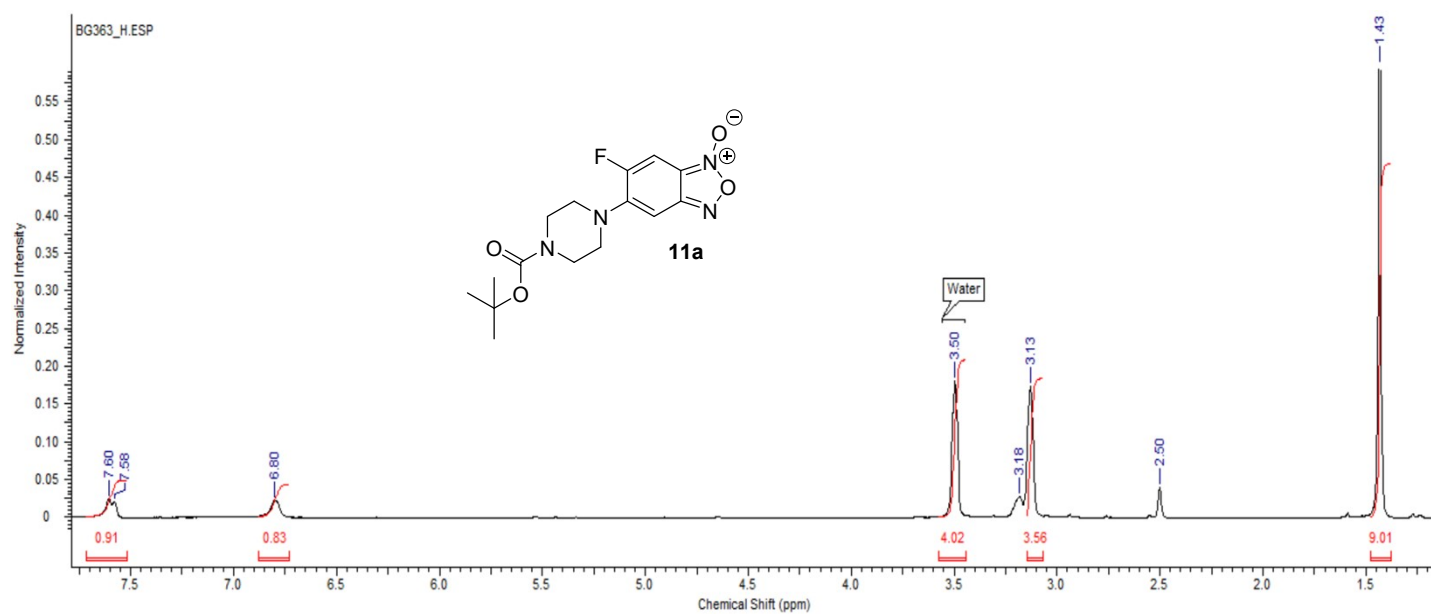

Figure S28. Copy of  $^{13}\text{C}$  NMR spectrum of the derivative **11a** at 75 °C.

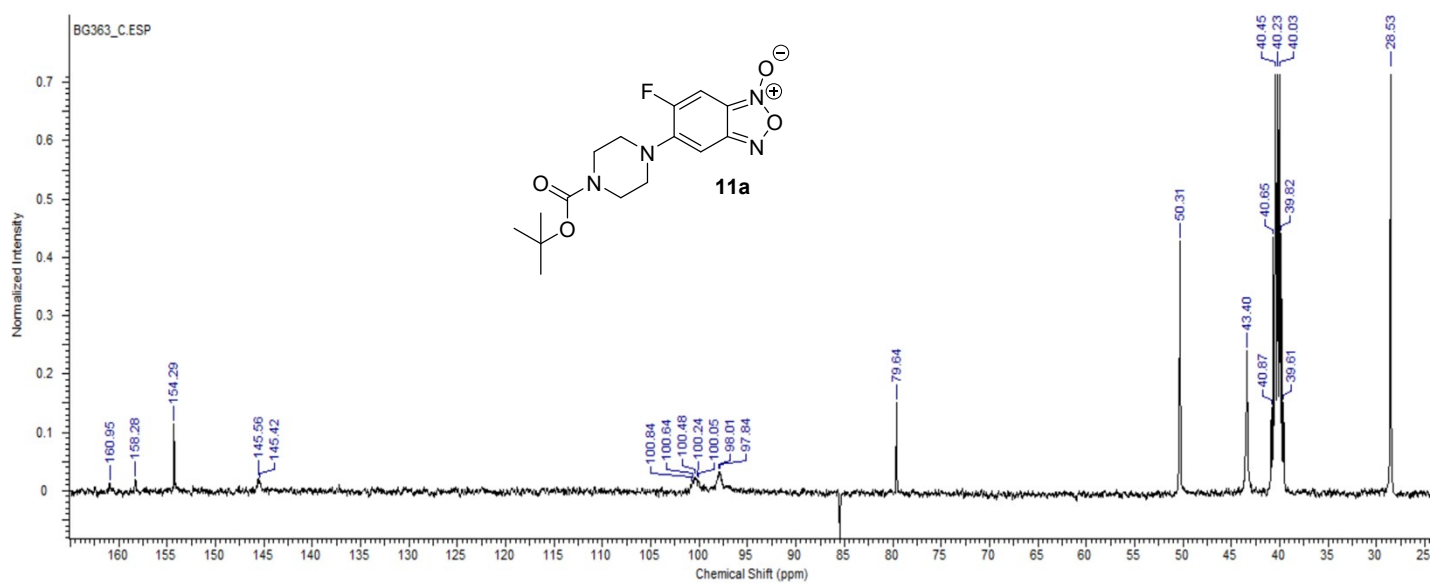

Figure S29. Copy of  $^1\text{H}$  NMR spectrum of the derivative **11b**.

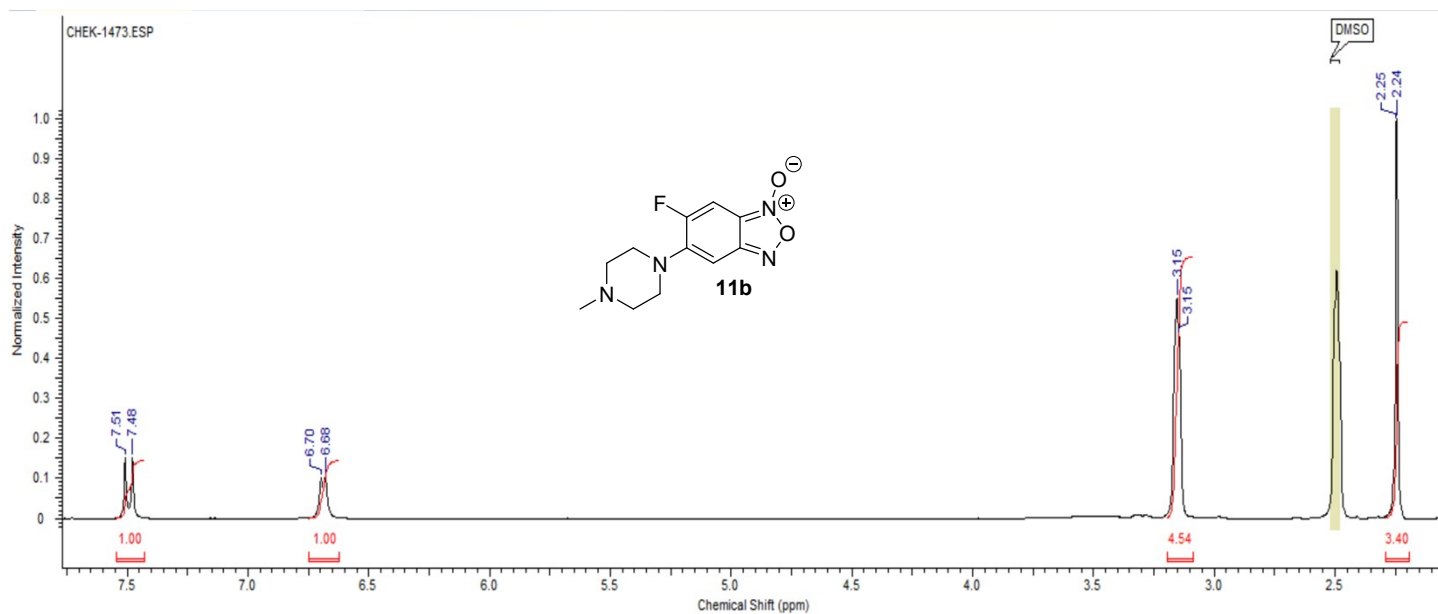

Figure S30. Copy of  $^{13}\text{C}$  NMR spectrum of the derivative **11b**.

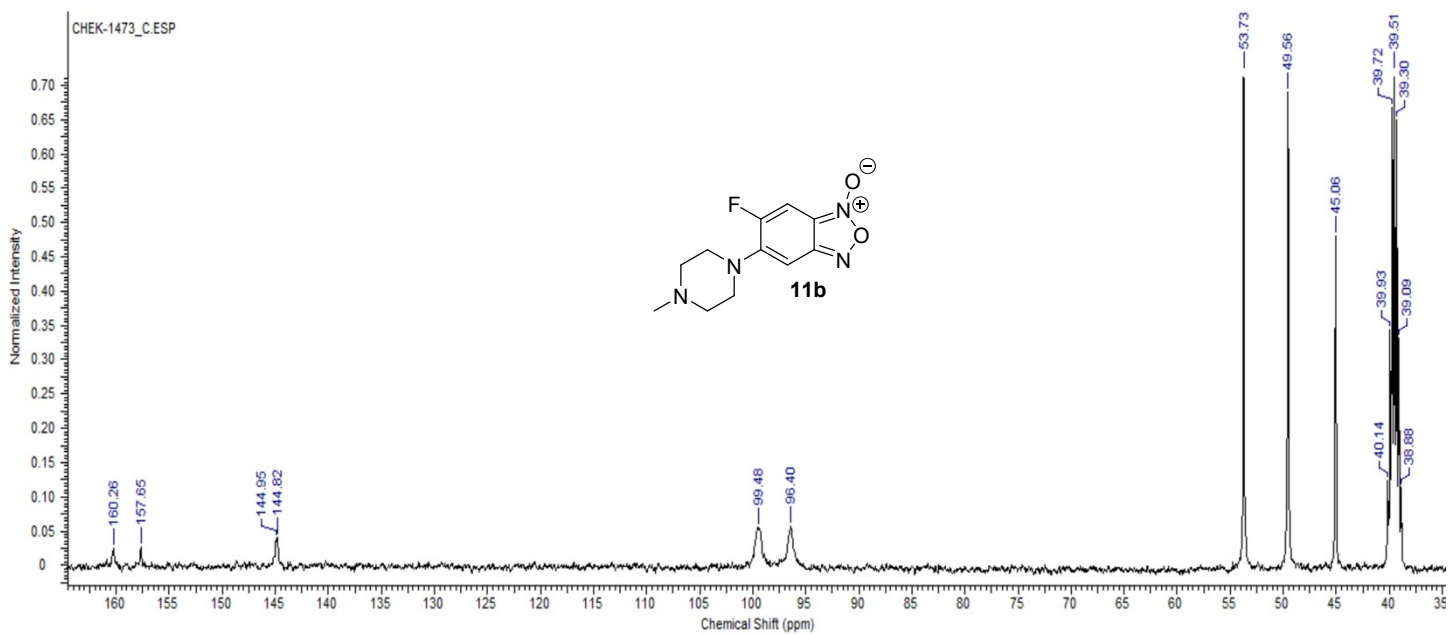



Figure S31. Copy of  $^1\text{H}$  NMR spectrum of the derivative **11c**.

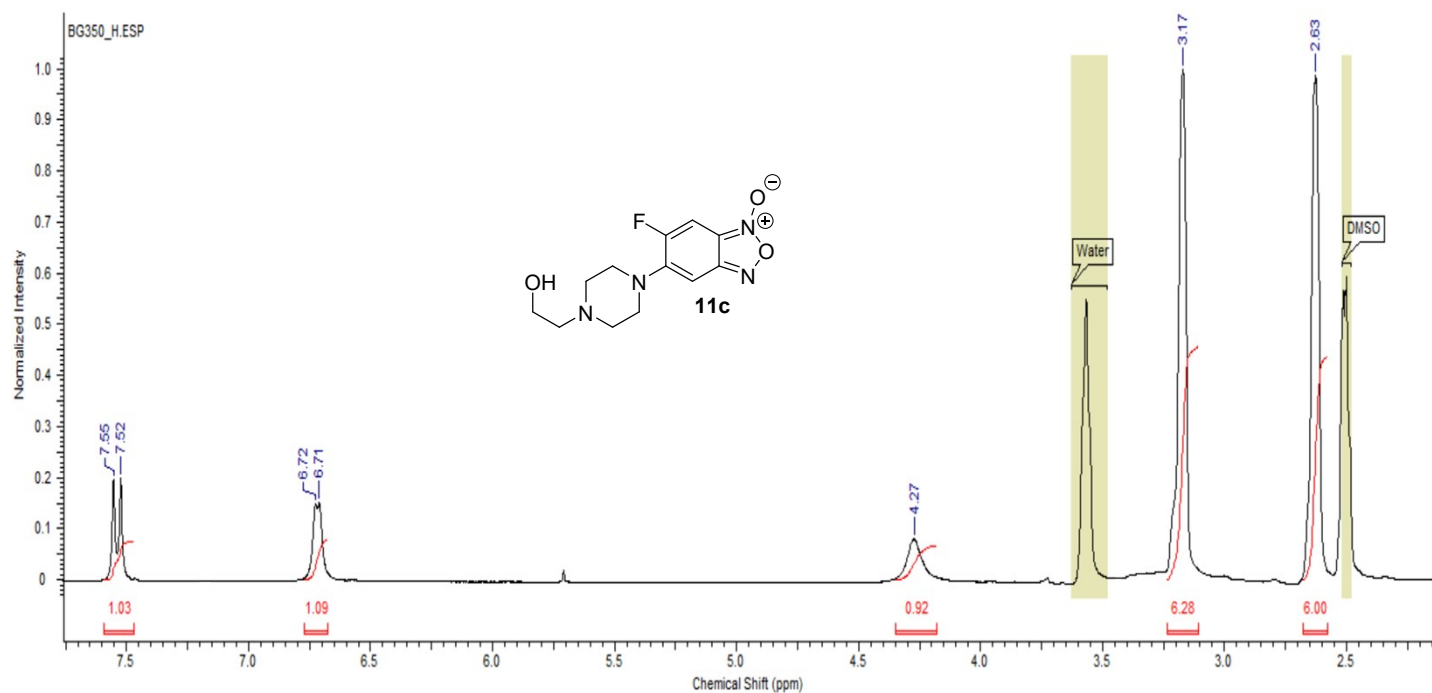

Figure S32. Copy of  $^{13}\text{C}$  NMR spectrum of the derivative **11c**.

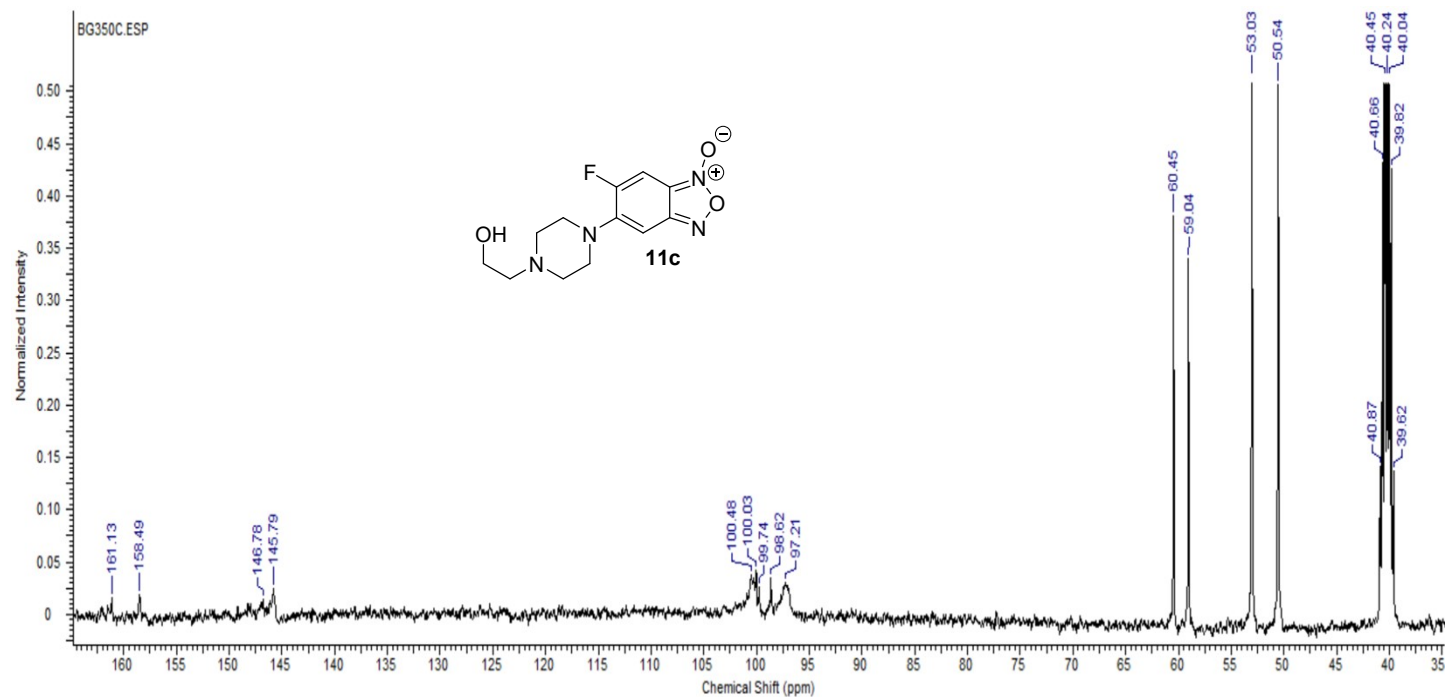

Figure S33. Copy of  $^1\text{H}$  NMR spectrum of the derivative **11d**.

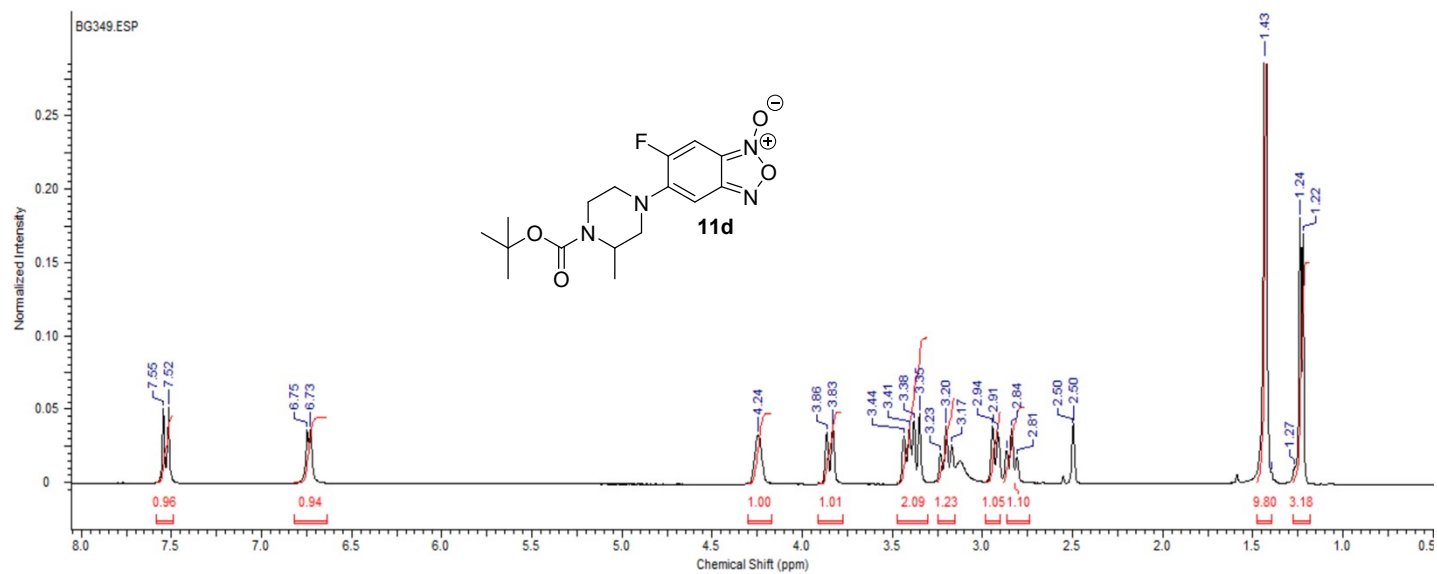

Figure S34. Copy of  $^{13}\text{C}$  NMR spectrum of the derivative **11d**.

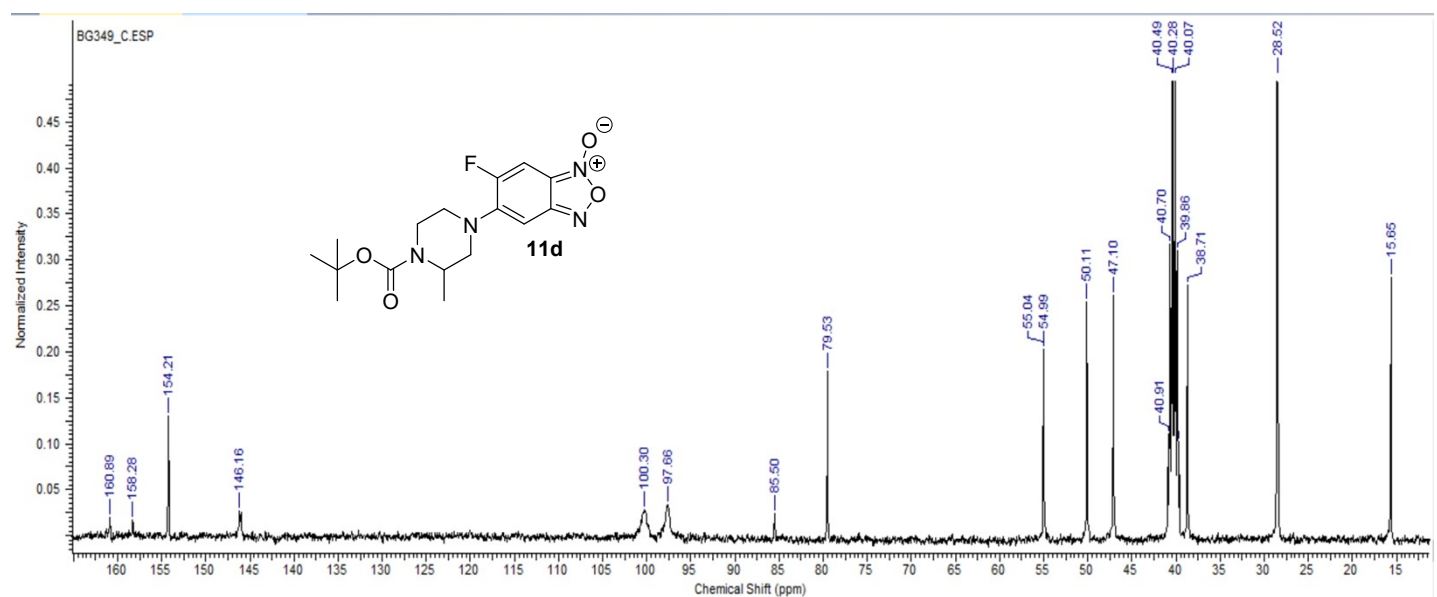

Figure S35. Copy of  $^1\text{H}$  NMR spectrum of the derivative **11e**.

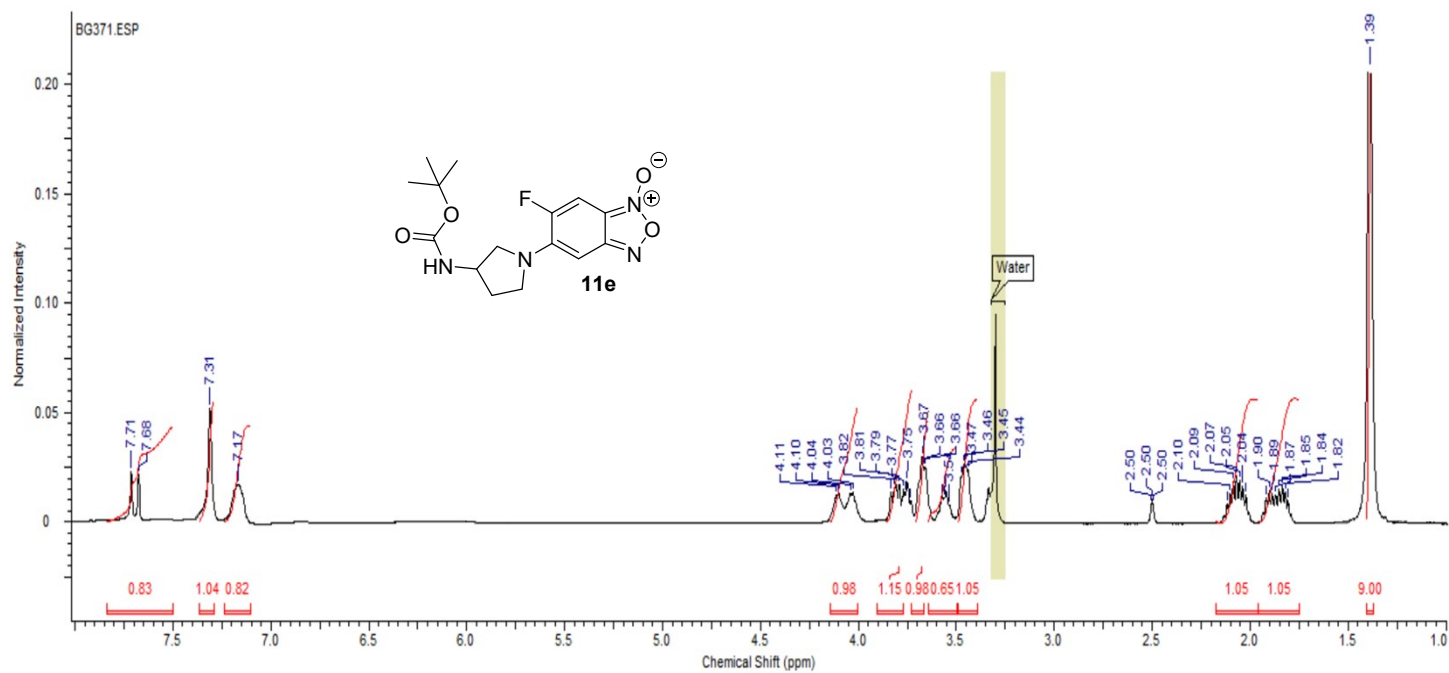

Figure S36. Copy of  $^{13}\text{C}$  NMR spectrum of the derivative **11e**.

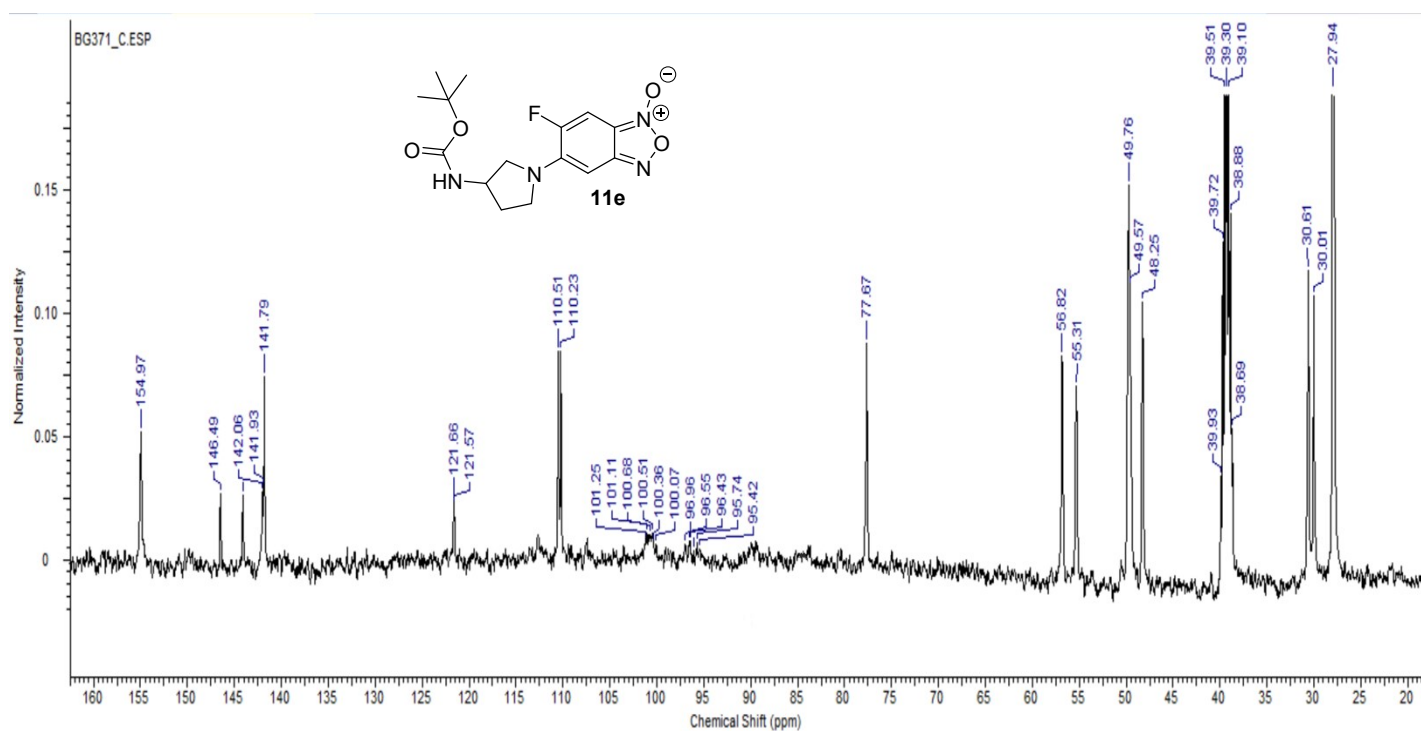

Figure S37. Copy of  $^1\text{H}$  NMR spectrum of the derivative **11f**.

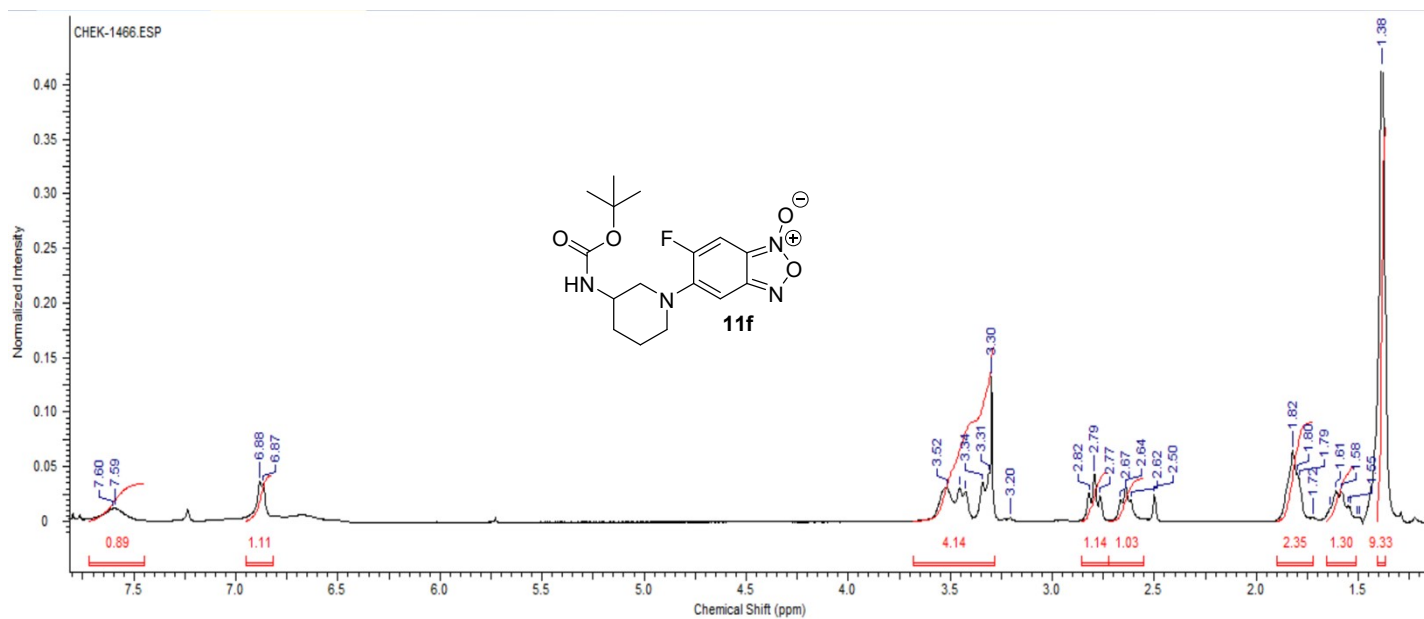

Figure S38. Copy of  $^{13}\text{C}$  NMR spectrum of the derivative **11f**.

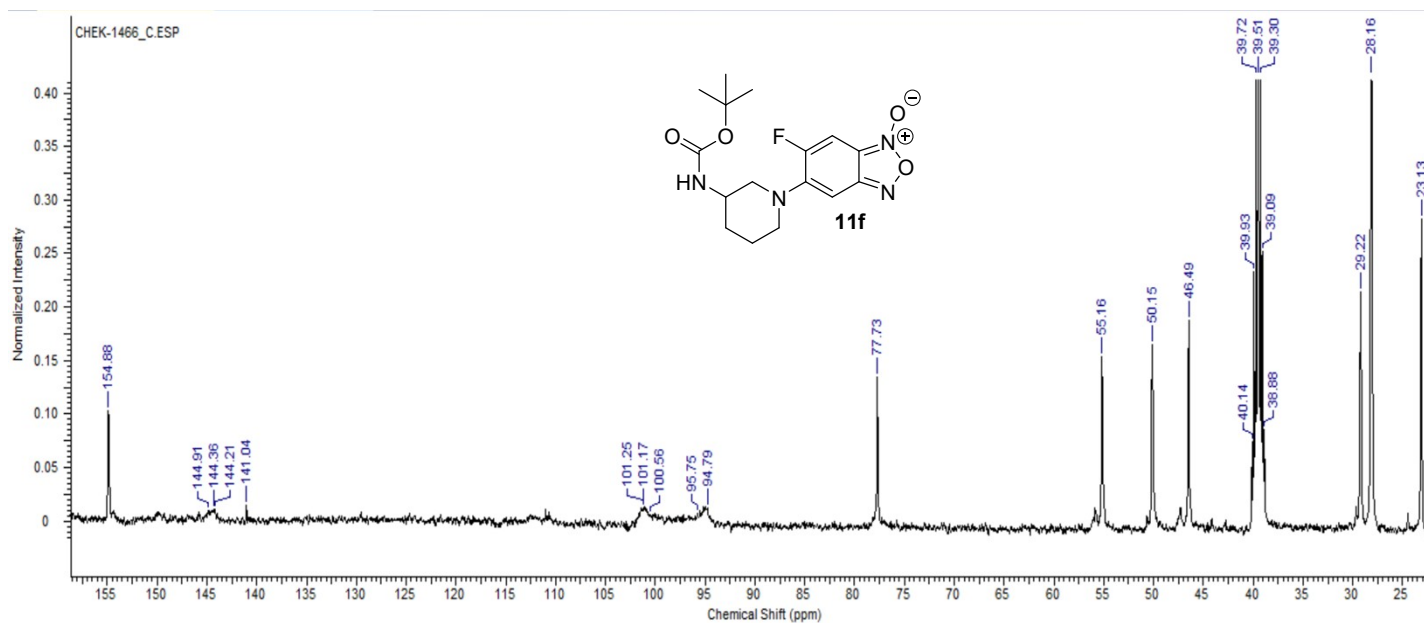

Figure S39. Copy of  $^1\text{H}$  NMR spectrum of the derivative **11g**.

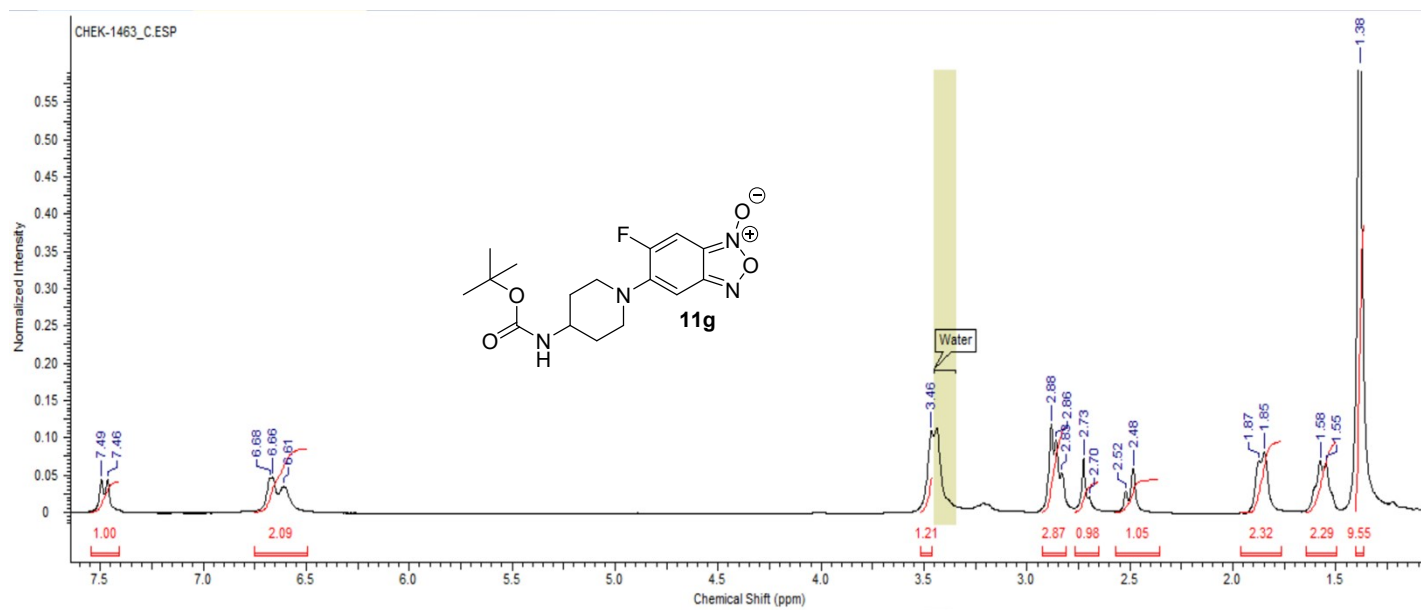

Figure S40. Copy of  $^{13}\text{C}$  NMR spectrum of the derivative **11g**.

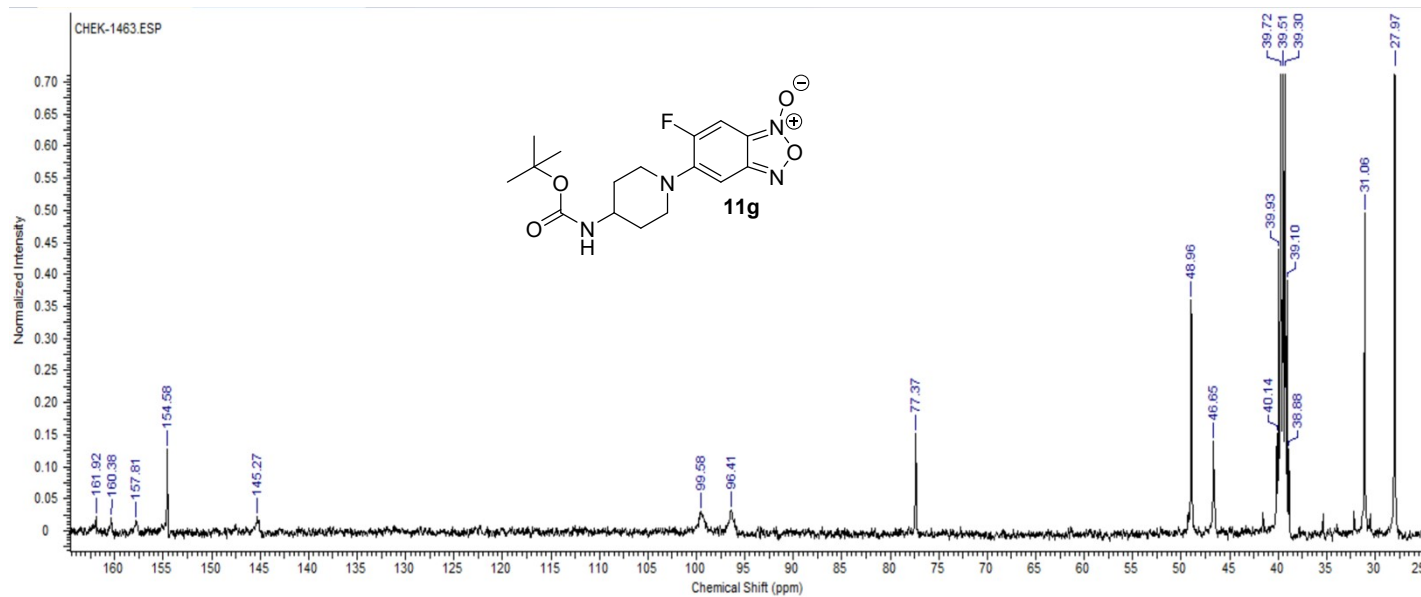

Figure S41. Copy of <sup>1</sup>H NMR spectrum of the derivative **11h**.

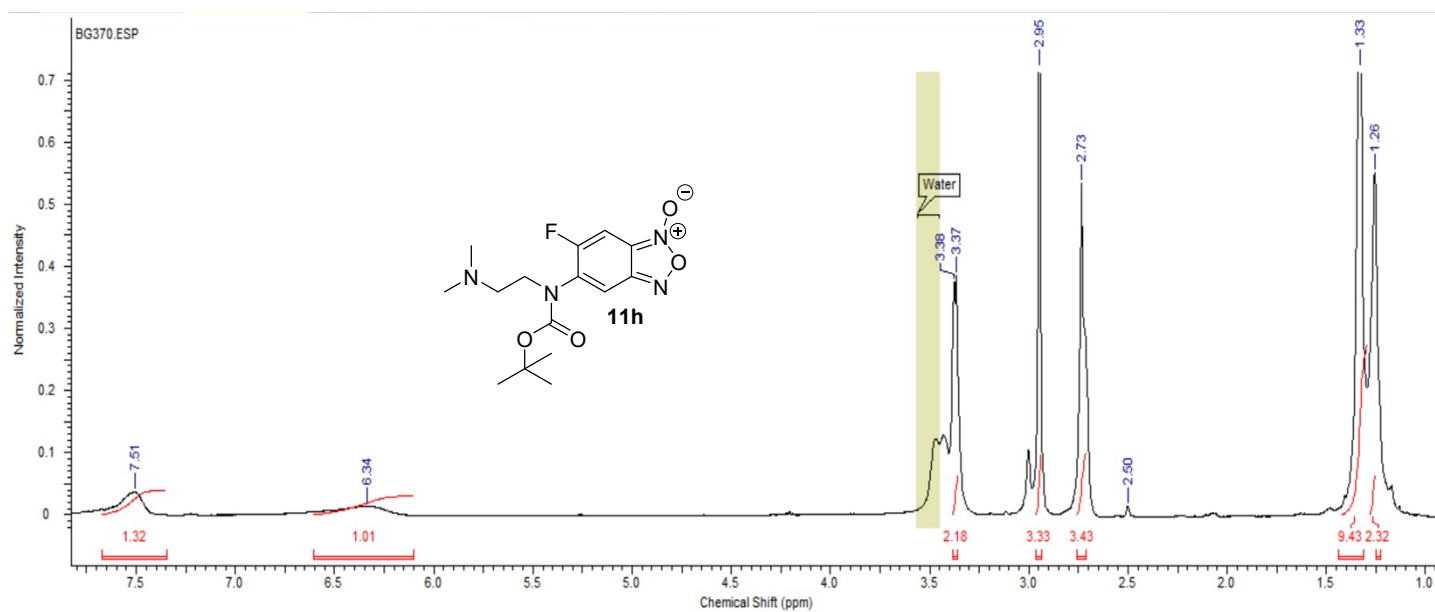

Figure S42. Copy of <sup>13</sup>C NMR spectrum of the derivative **11h**.

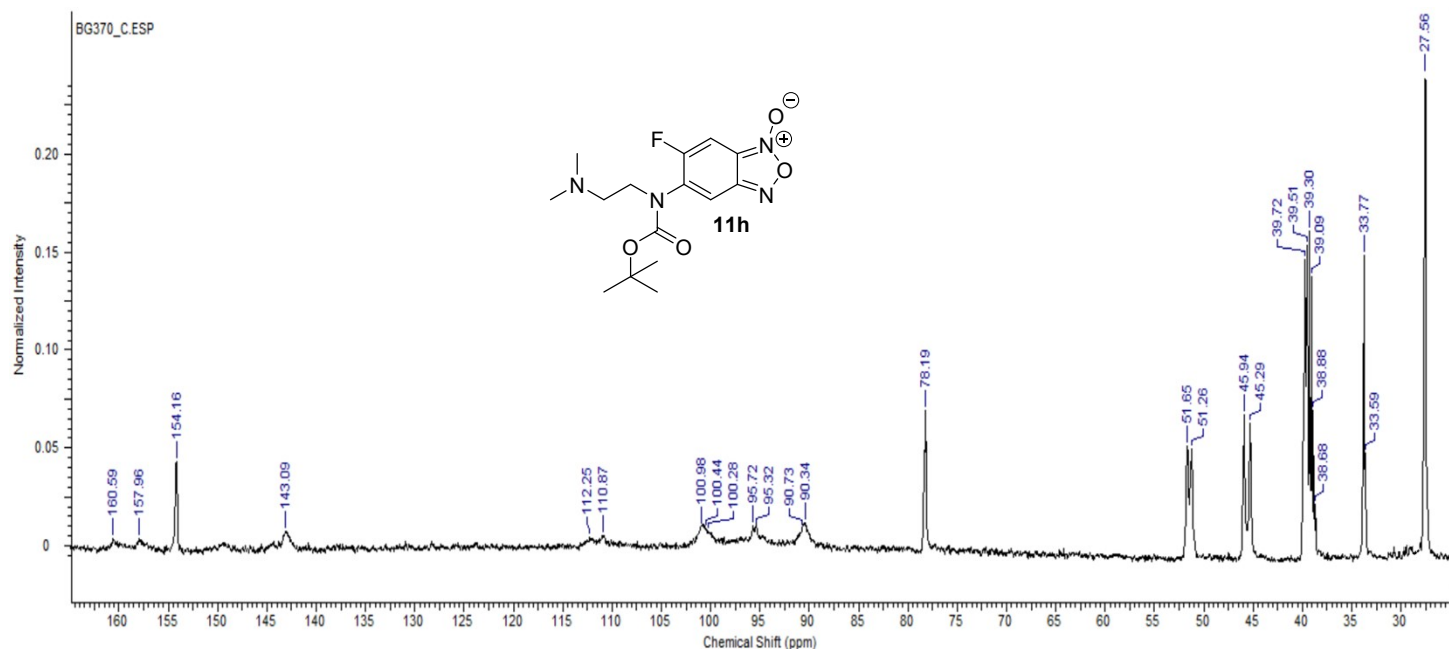

Figure S43. Copy of  $^1\text{H}$  NMR spectrum of the derivative **12a**.

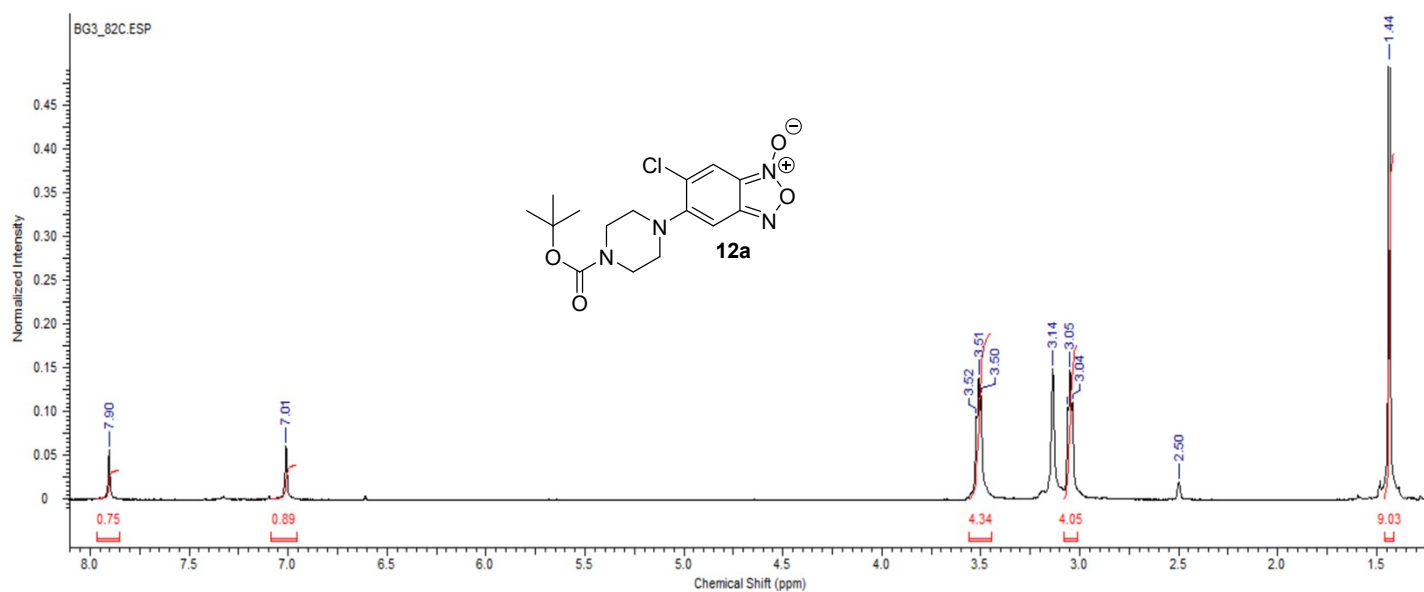

Figure S44. Copy of  $^{13}\text{C}$  NMR spectrum of the derivative **12a**.

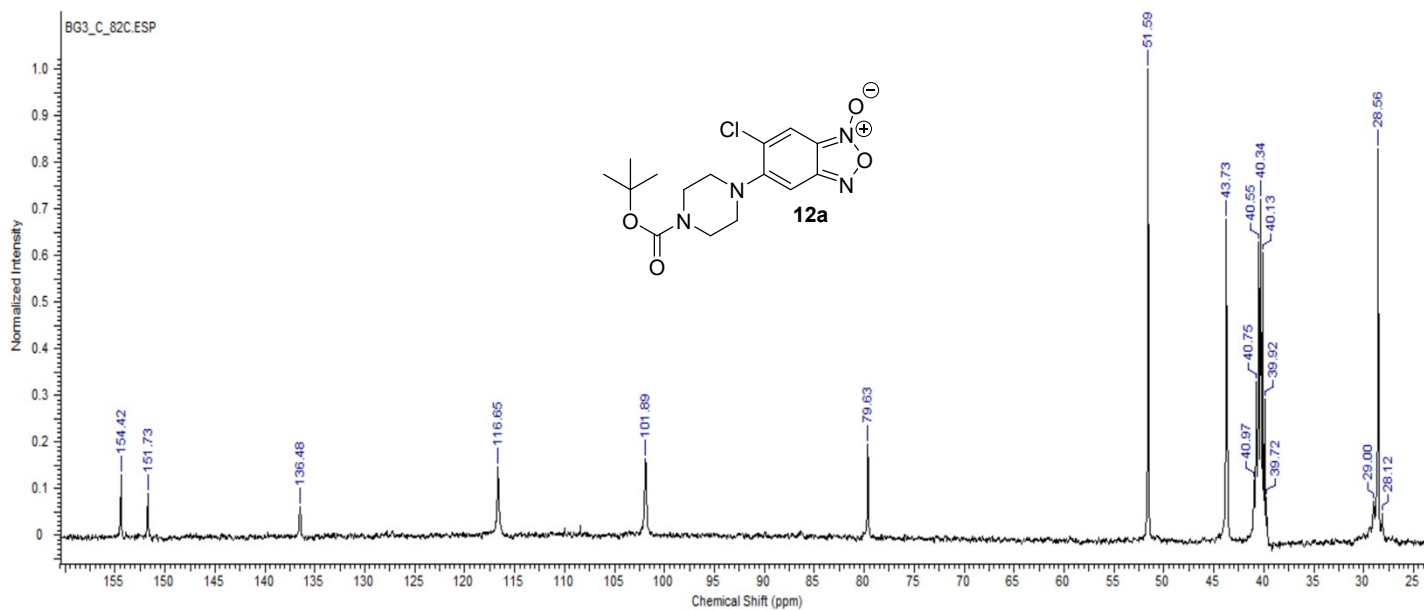

Figure S45. Copy of  $^1\text{H}$  NMR spectrum of the derivative **12b**.

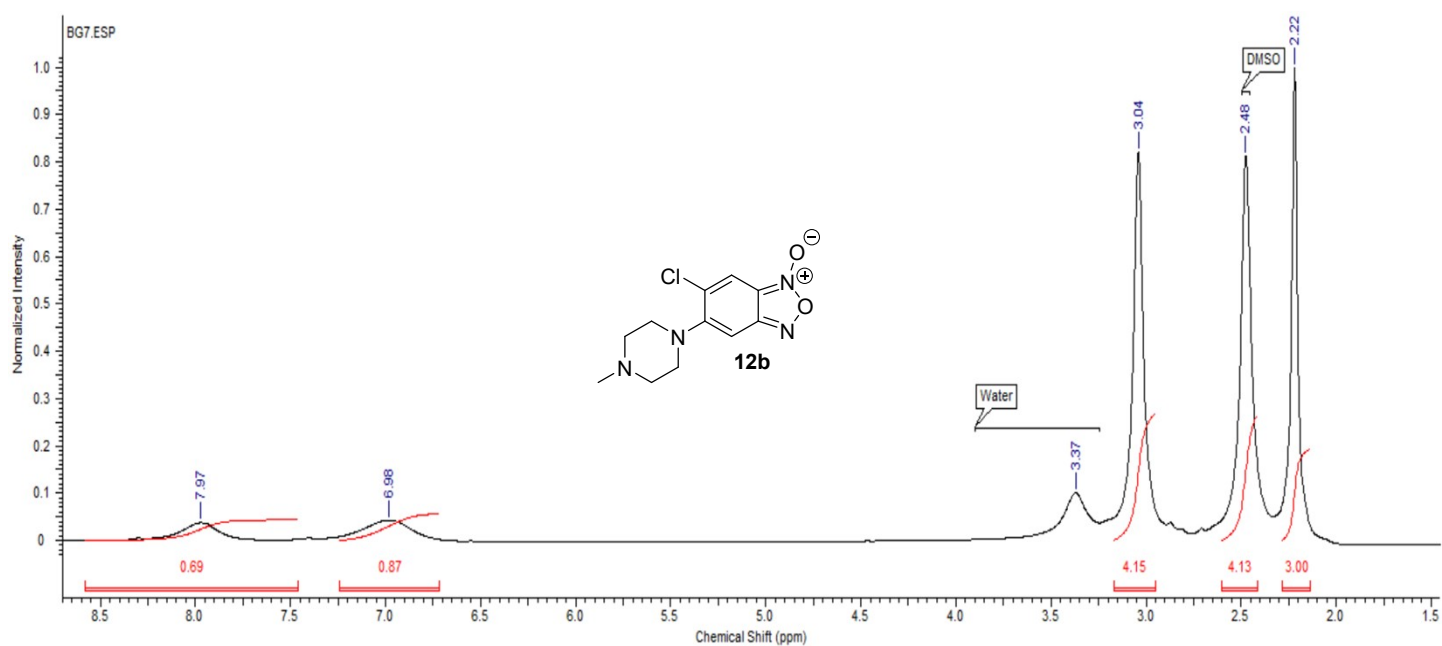

Figure S46. Copy of  $^{13}\text{C}$  NMR spectrum of the derivative **12b**.

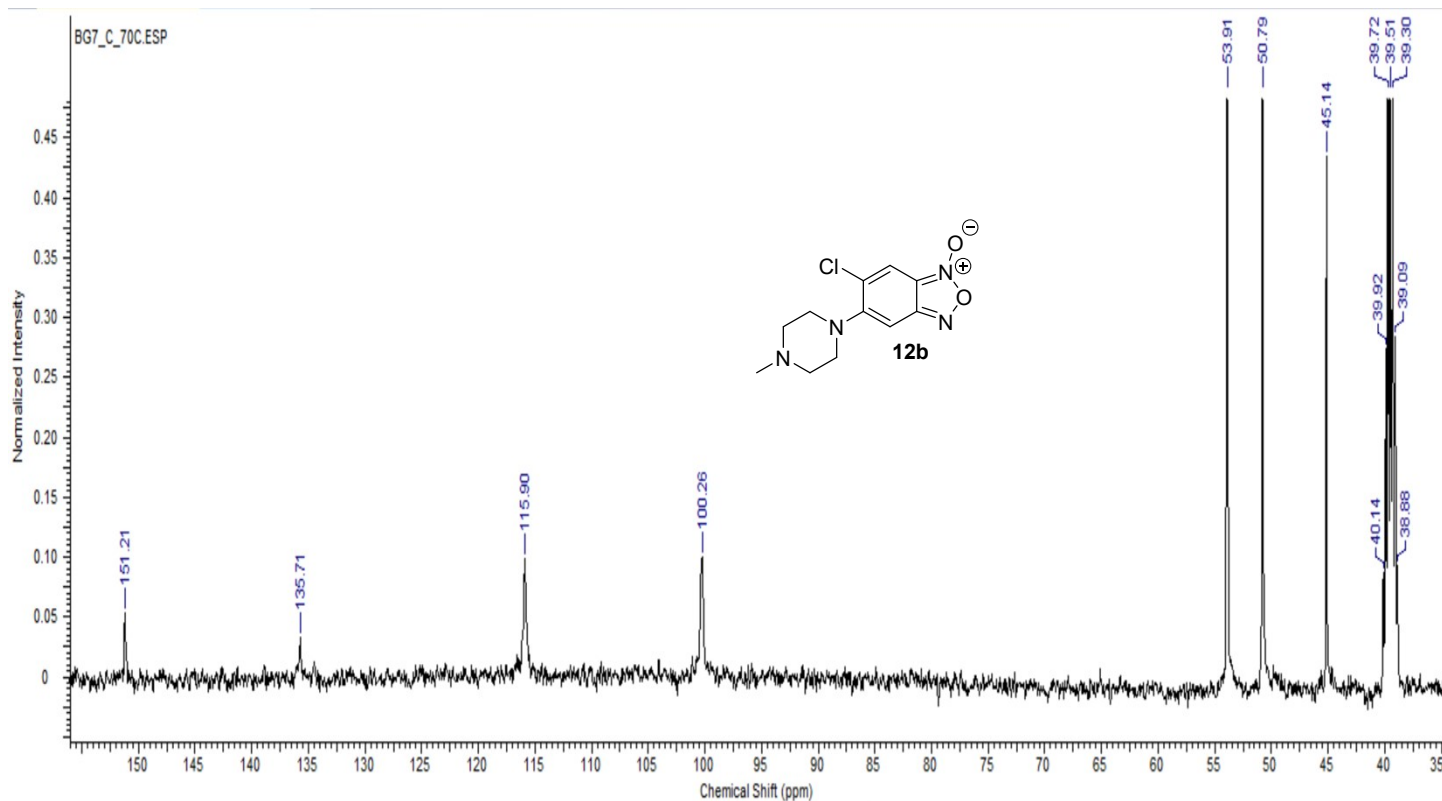



Figure S47. Copy of  $^1\text{H}$  NMR spectrum of the derivative **12g**.

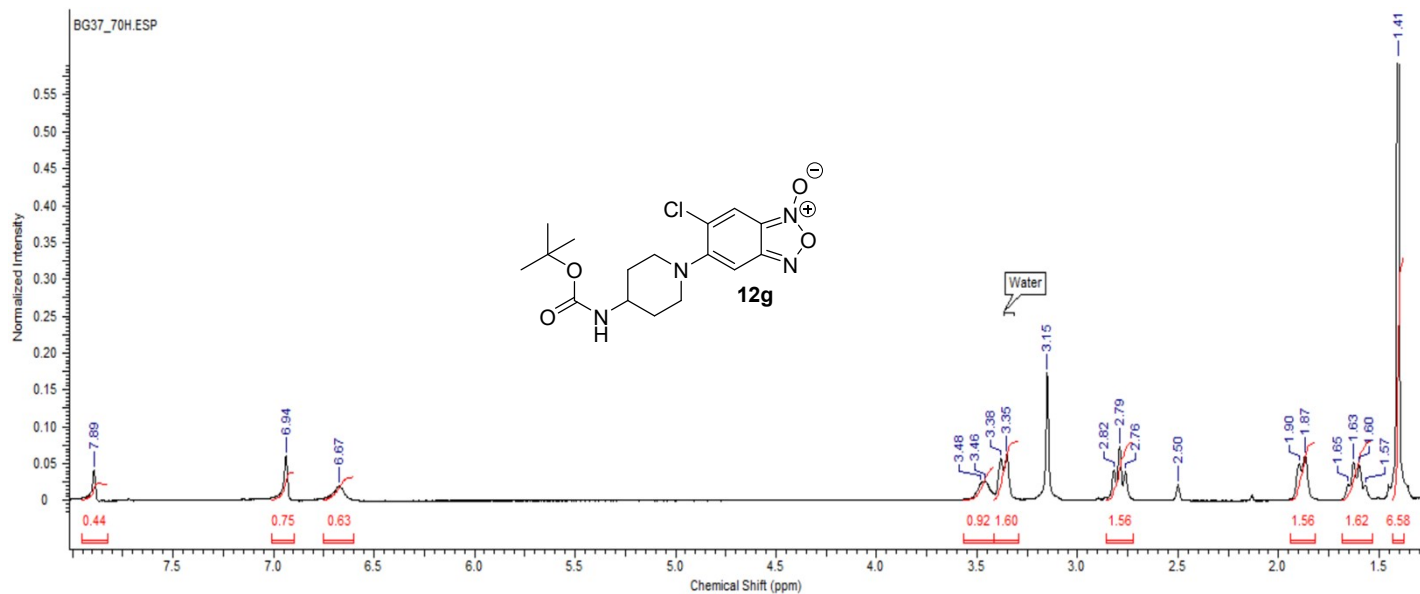

Figure S48. Copy of  $^{13}\text{C}$  NMR spectrum of the derivative **12g**.

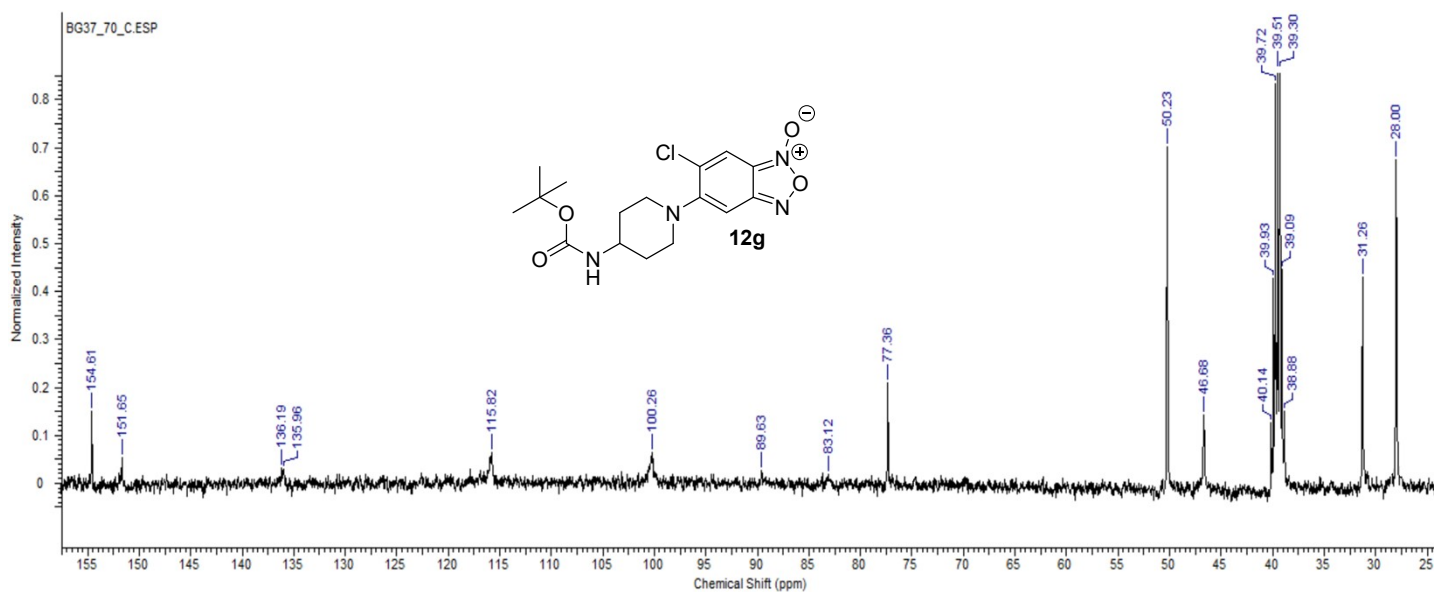

Figure S49. Copy of  $^1\text{H}$  NMR spectrum of the derivative **13a**.

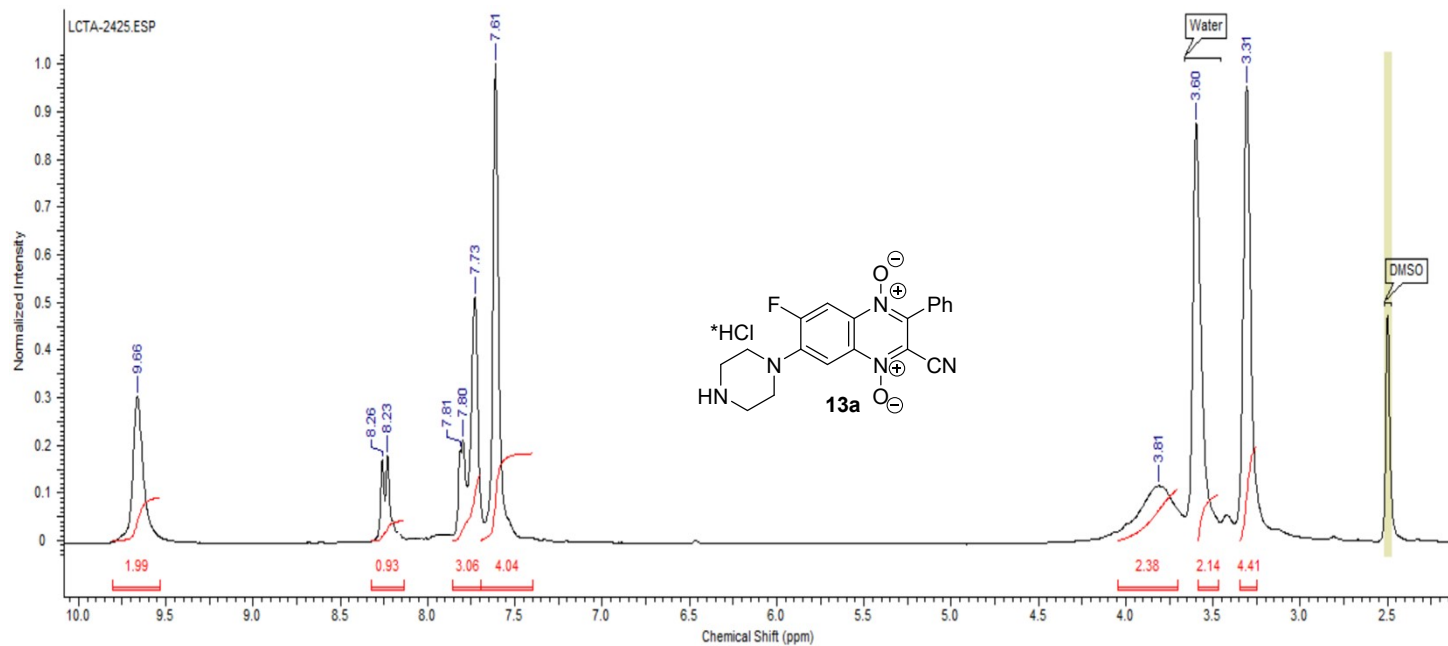

Figure S50. Copy of  $^{13}\text{C}$  NMR spectrum of the derivative **13a**.

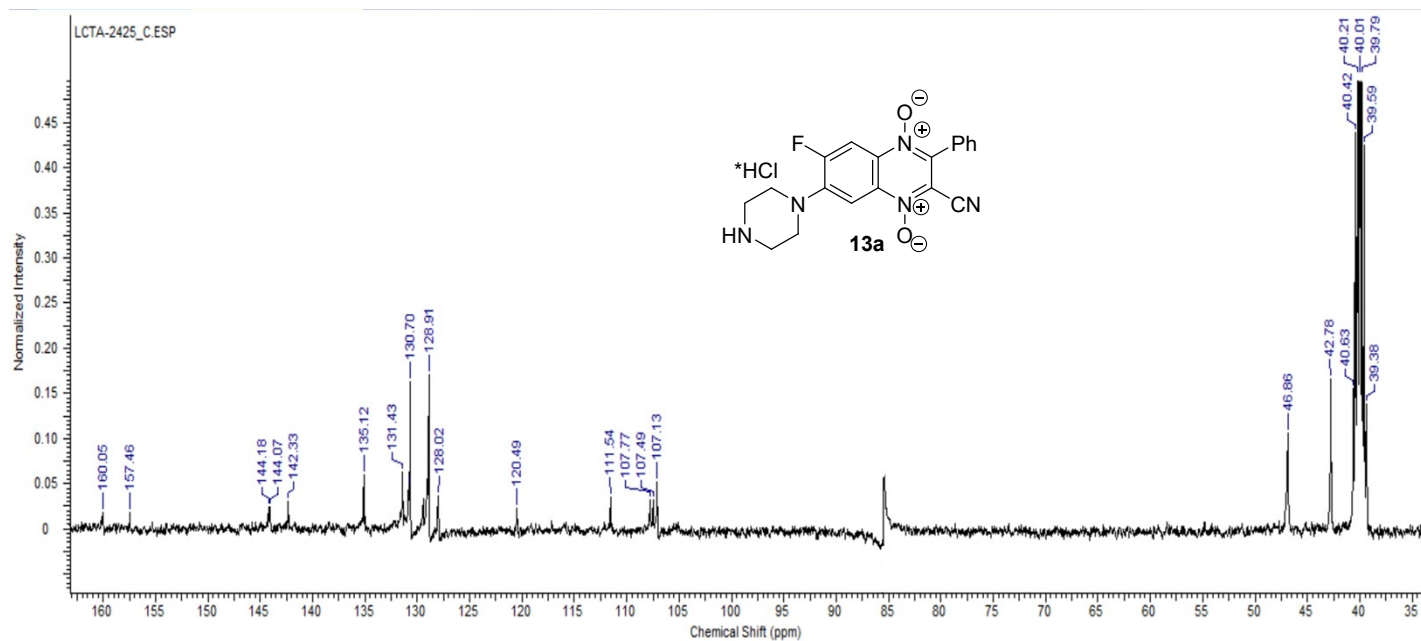

Figure S51. Copy of  $^1\text{H}$  NMR spectrum of the derivative **13b**.

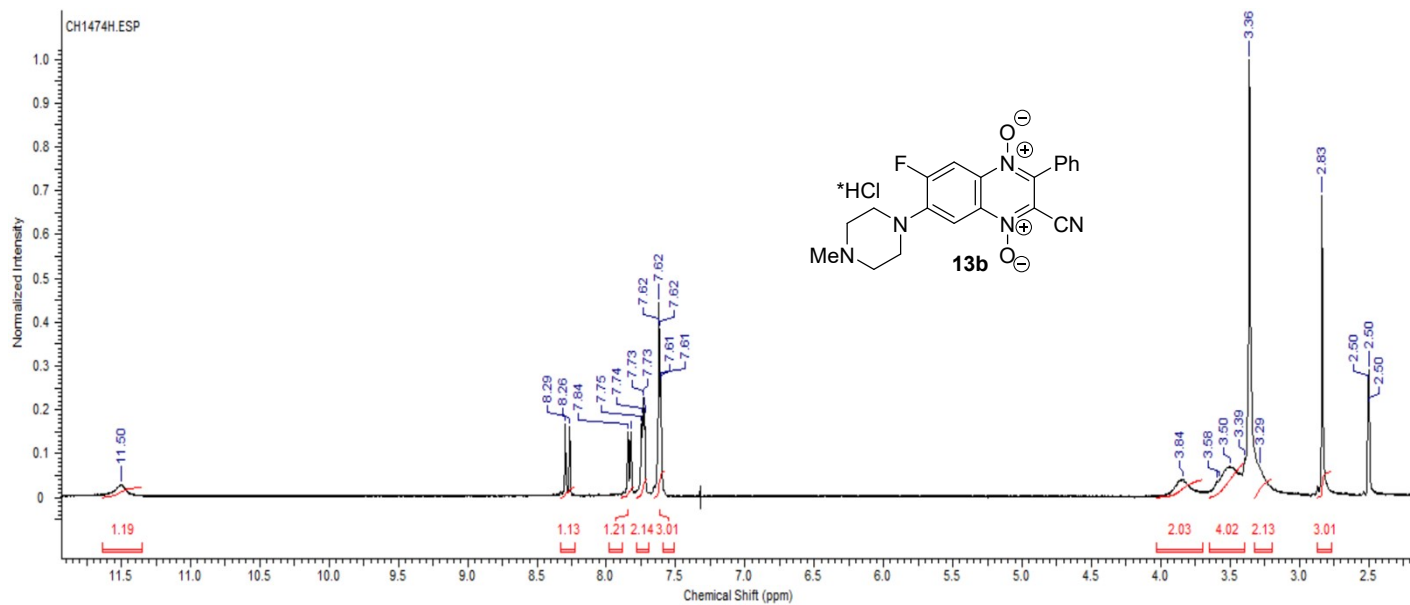

Figure S52. Copy of  $^{13}\text{C}$  NMR spectrum of the derivative **13b**.

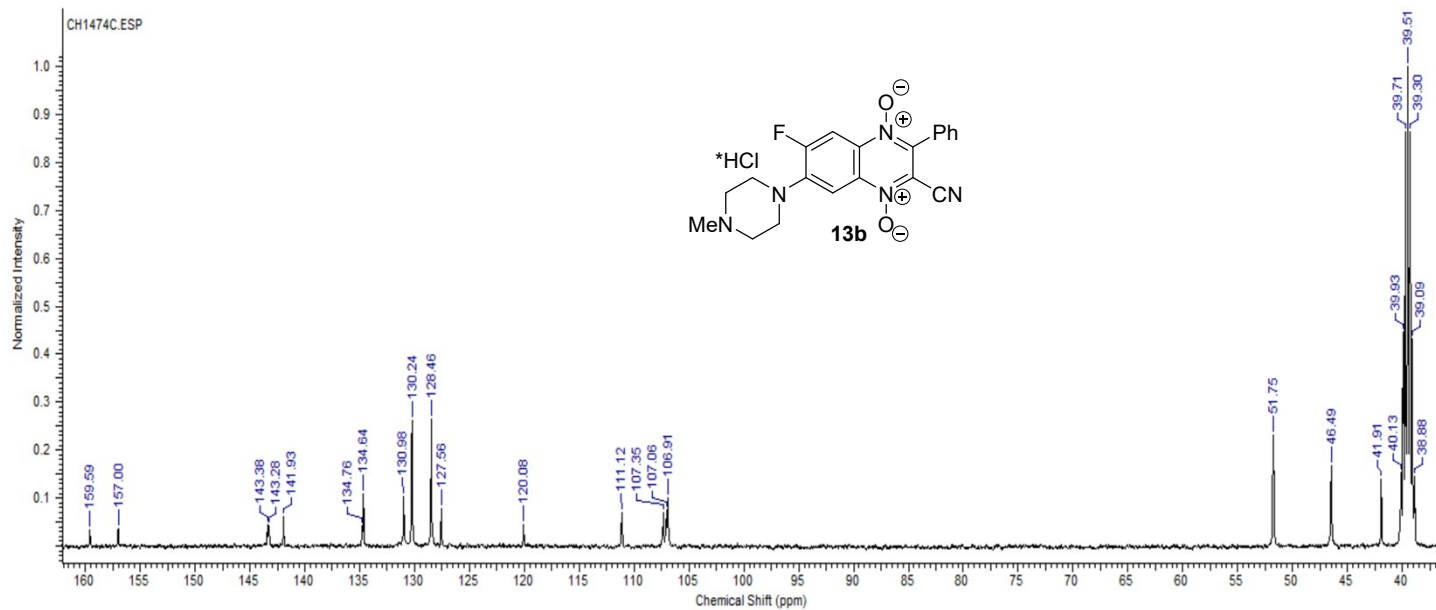

Figure S53. Copy of  $^1\text{H}$  NMR spectrum of the derivative **13c**.

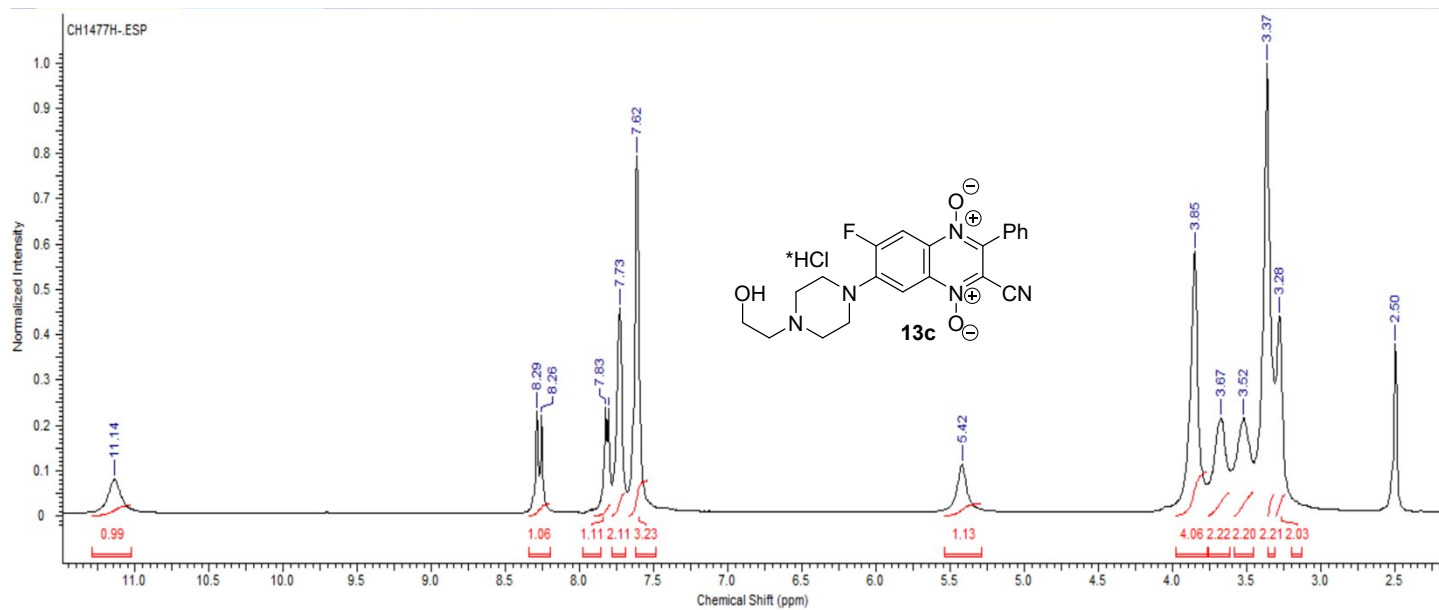

Figure S54. Copy of  $^{13}\text{C}$  NMR spectrum of the derivative **13c**.

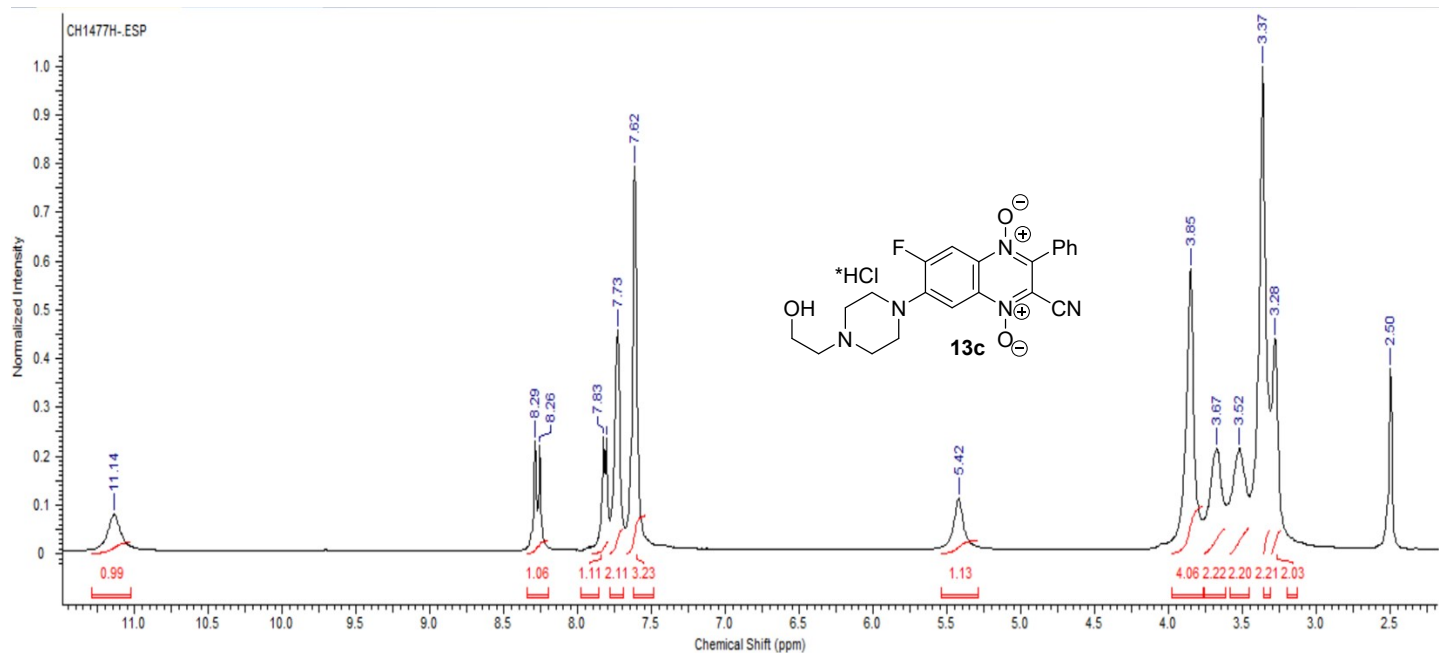

Figure S55. Copy of  $^1\text{H}$  NMR spectrum of the derivative **13d**.

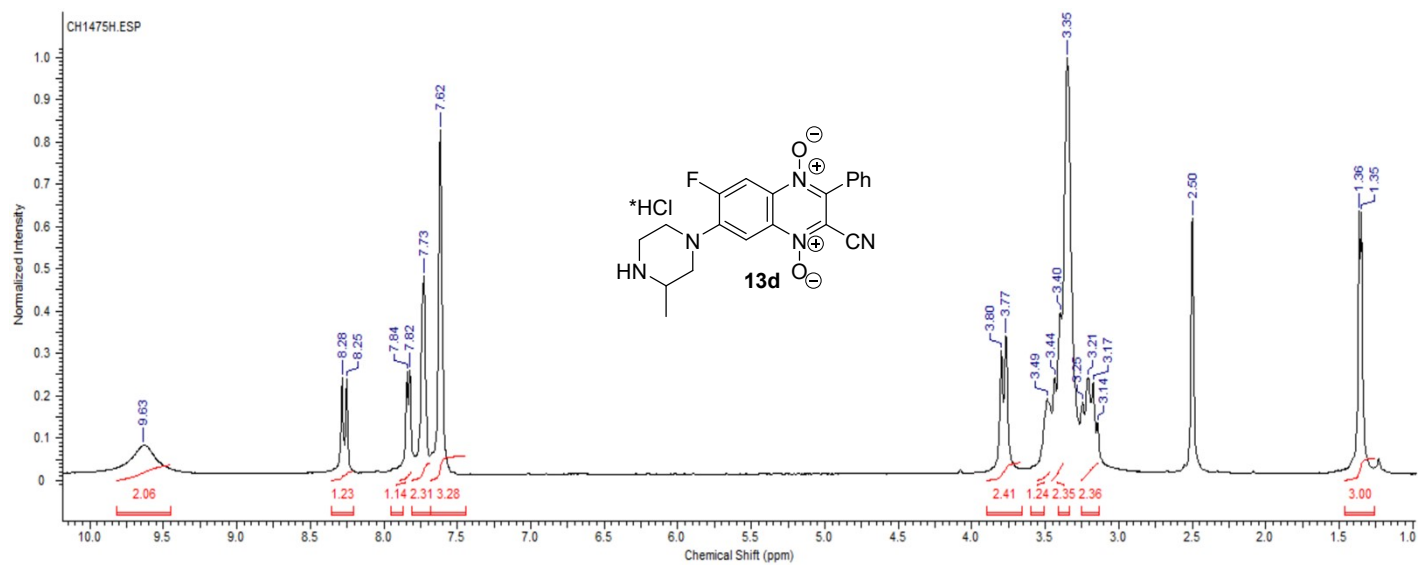

Figure S56. Copy of  $^{13}\text{C}$  NMR spectrum of the derivative **13d**.

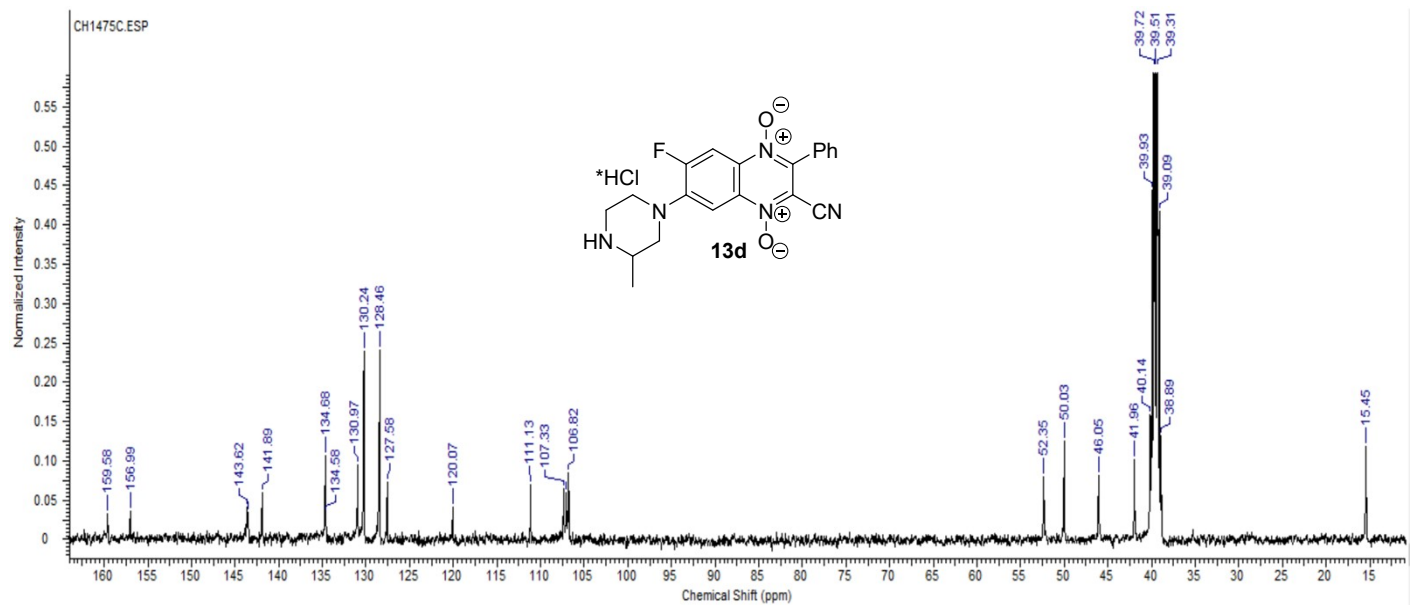

Figure S57. Copy of  $^1\text{H}$  NMR spectrum of the derivative **13e**.

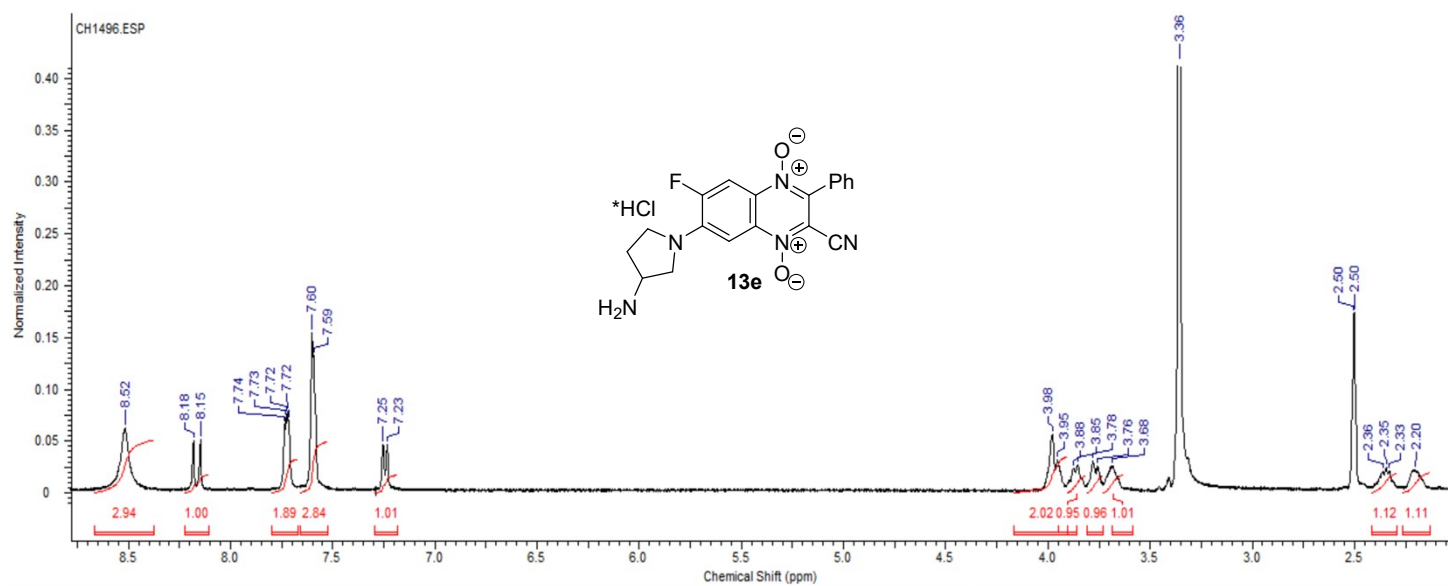

Figure S58. Copy of  $^{13}\text{C}$  NMR spectrum of the derivative **13e**.

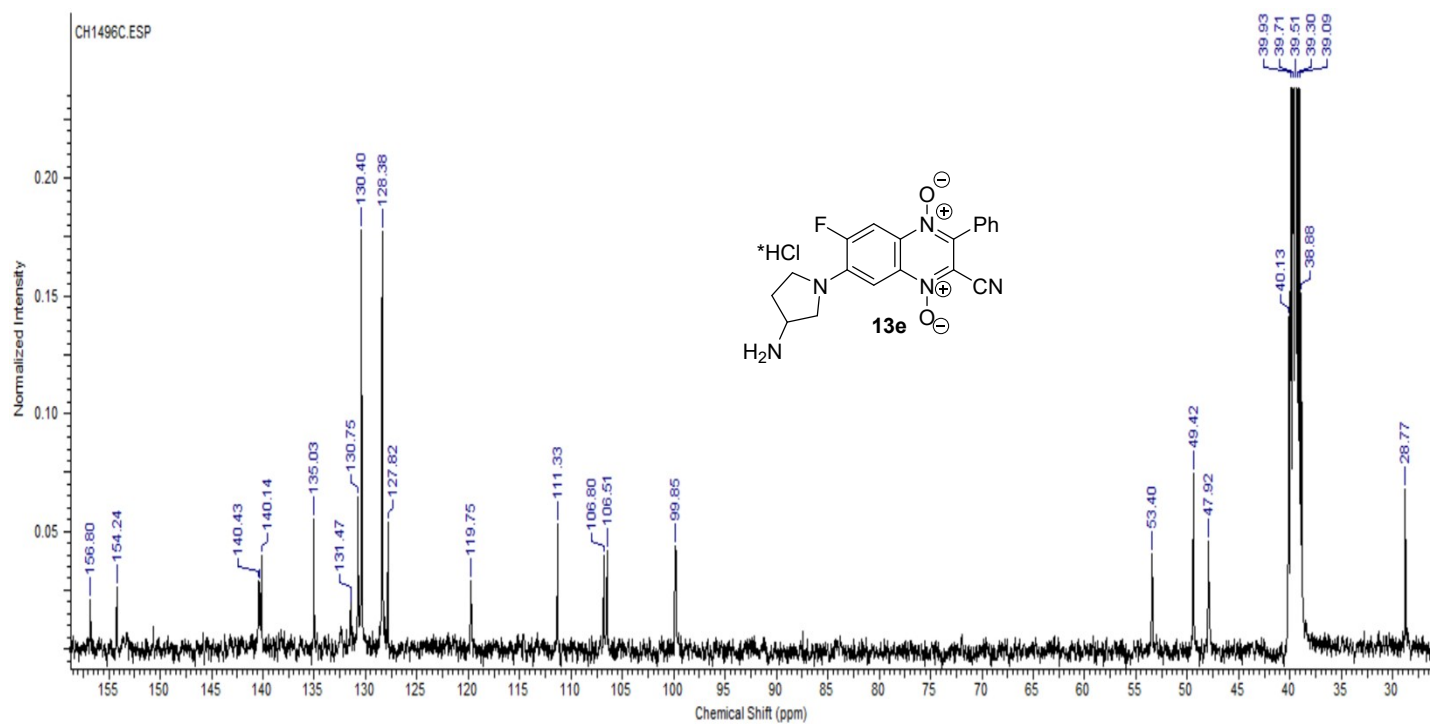

Figure S59. Copy of  $^1\text{H}$  NMR spectrum of the derivative **13f**.

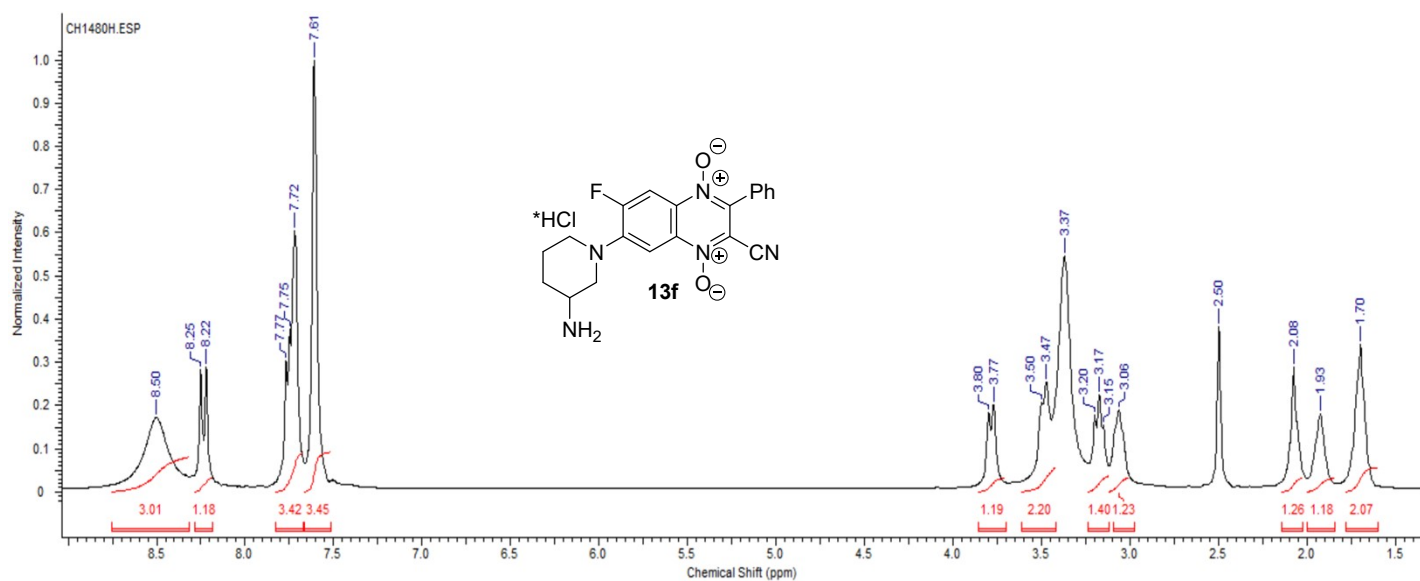

Figure S60. Copy of  $^{13}\text{C}$  NMR spectrum of the derivative **13f**.

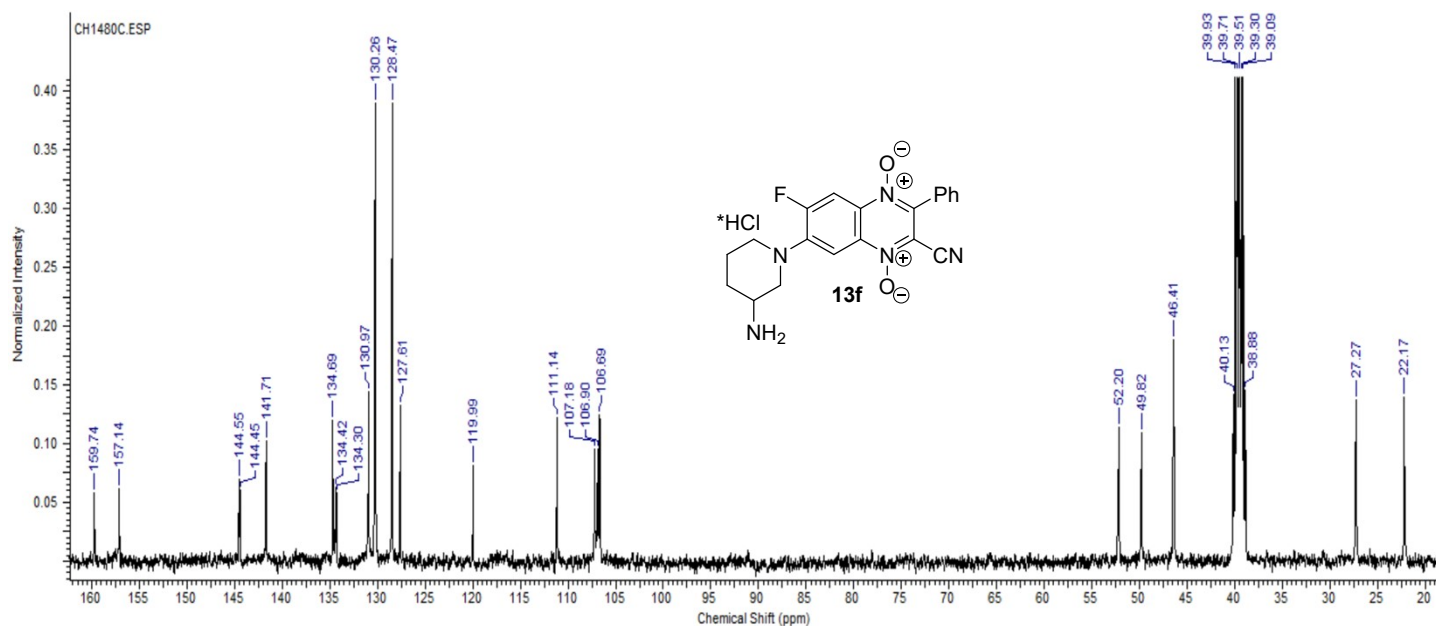

Figure S61. Copy of  $^1\text{H}$  NMR spectrum of the derivative **13g**.

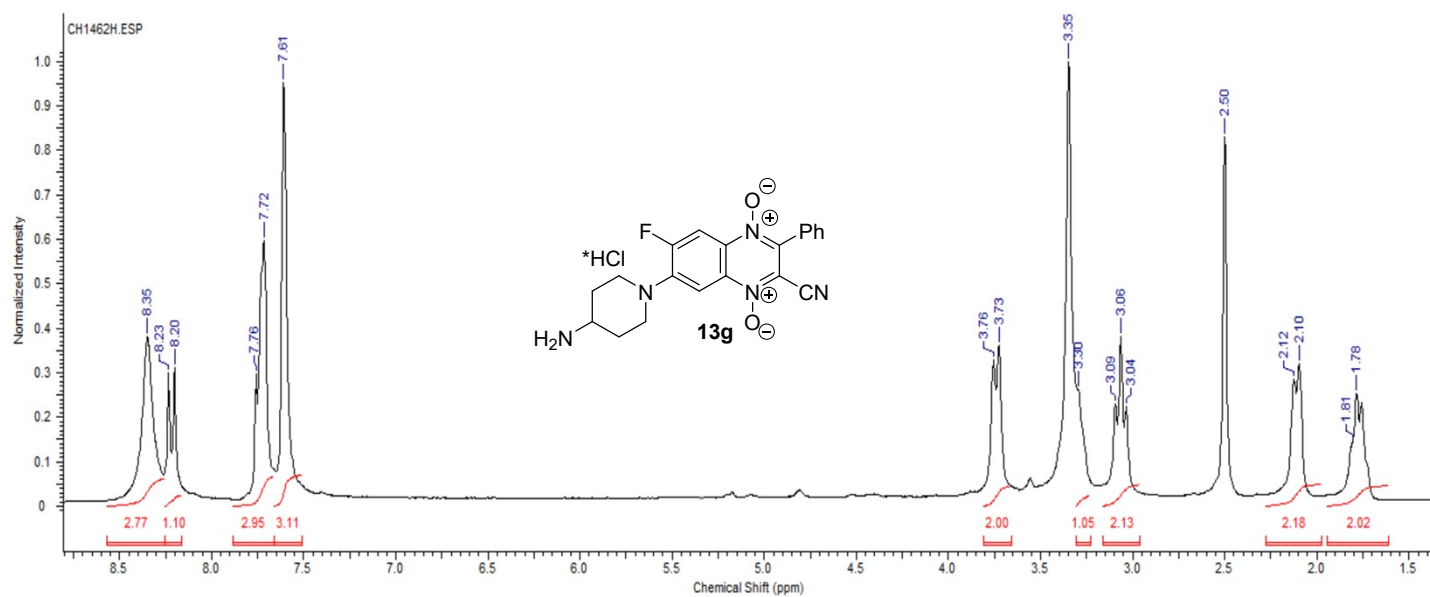

Figure S62. Copy of  $^{13}\text{C}$  NMR spectrum of the derivative **13g**.

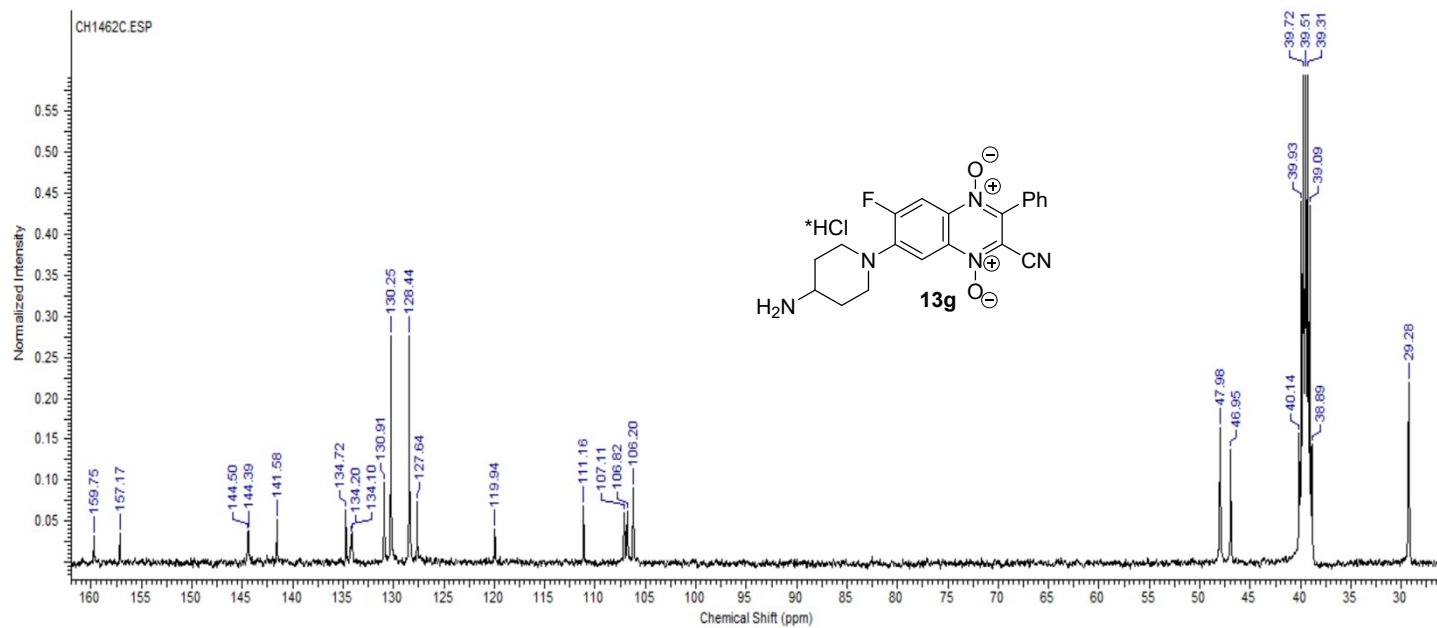



Figure S63. Copy of  $^1\text{H}$  NMR spectrum of the derivative **13h**.

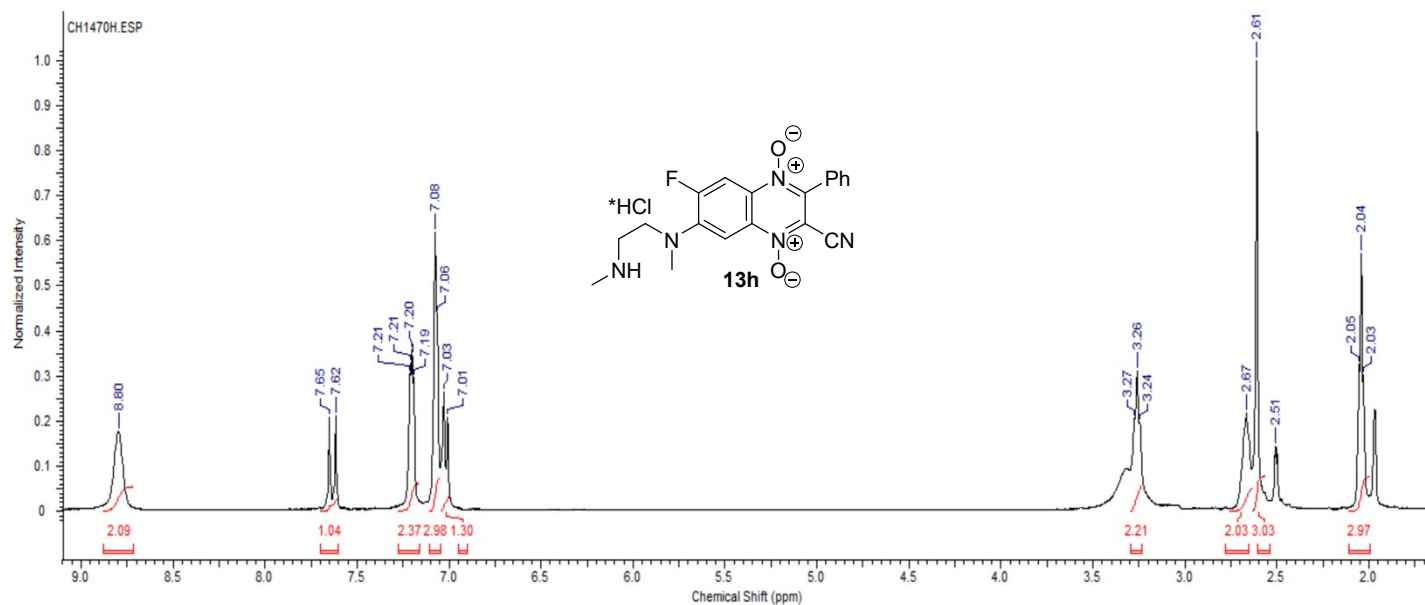

Figure S64. Copy of  $^{13}\text{C}$  NMR spectrum of the derivative **13h**.

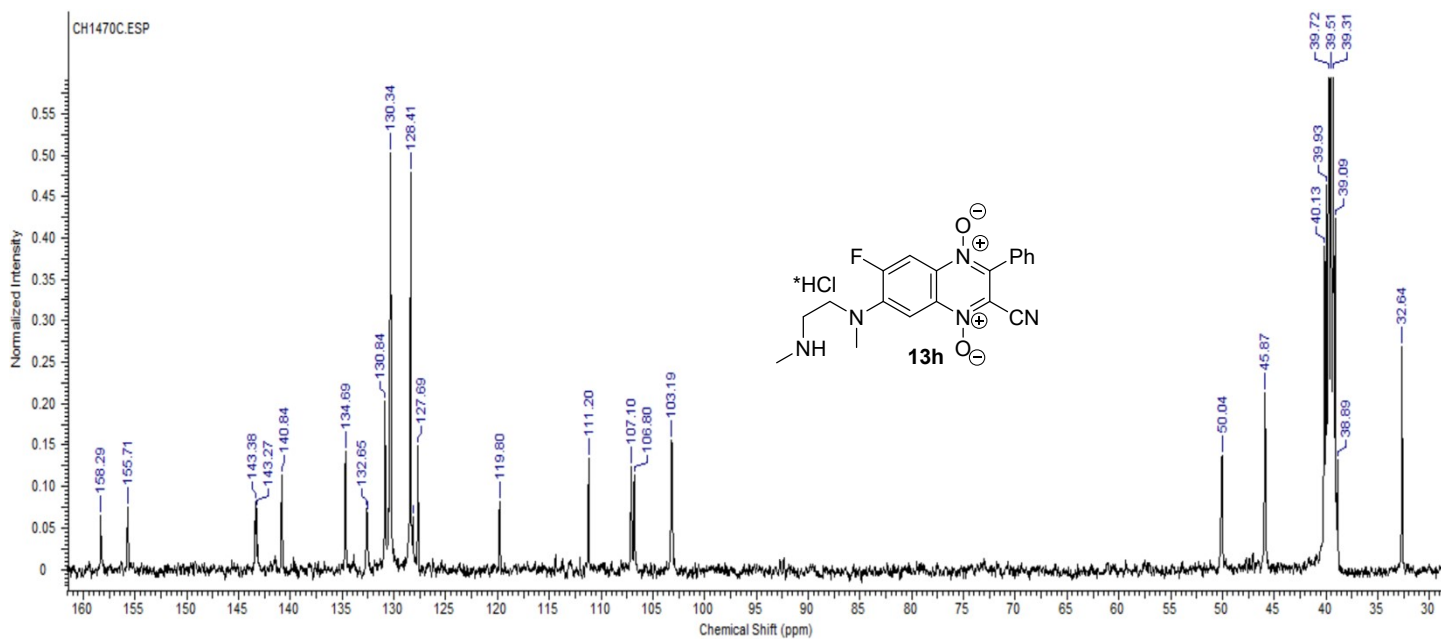

Figure S65. Copy of  $^1\text{H}$  NMR spectrum of the derivative **14a**.

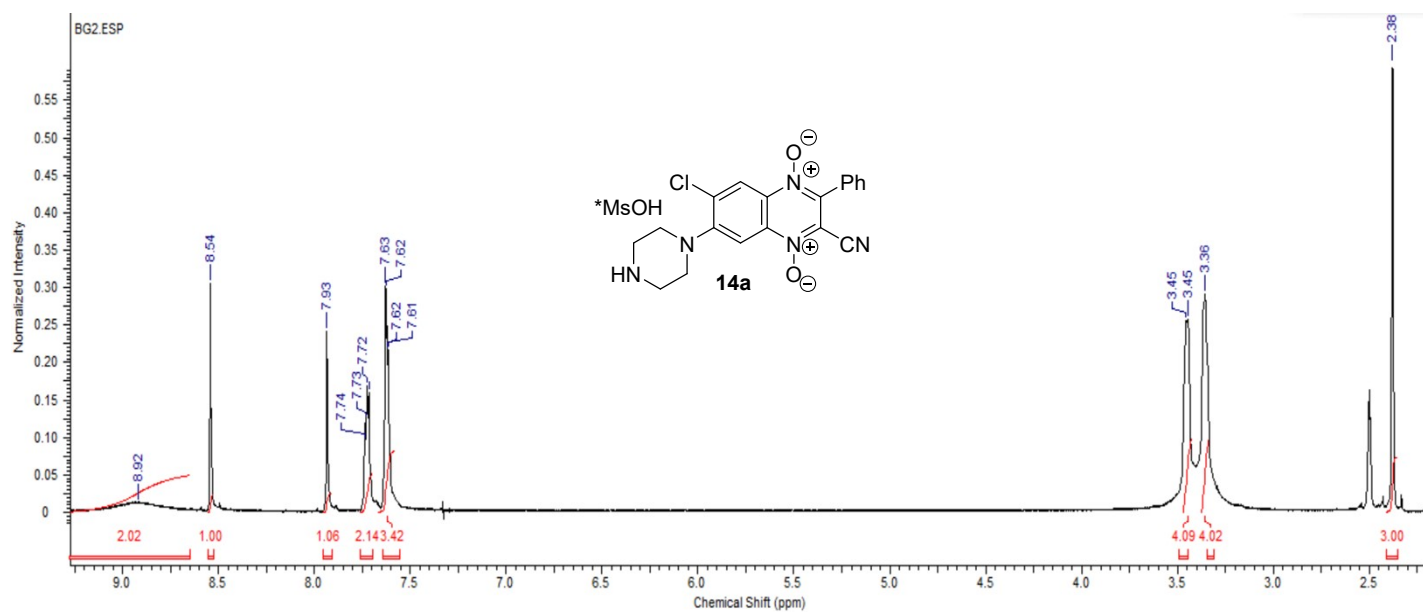

Figure S66. Copy of  $^{13}\text{C}$  NMR spectrum of the derivative **14a**.

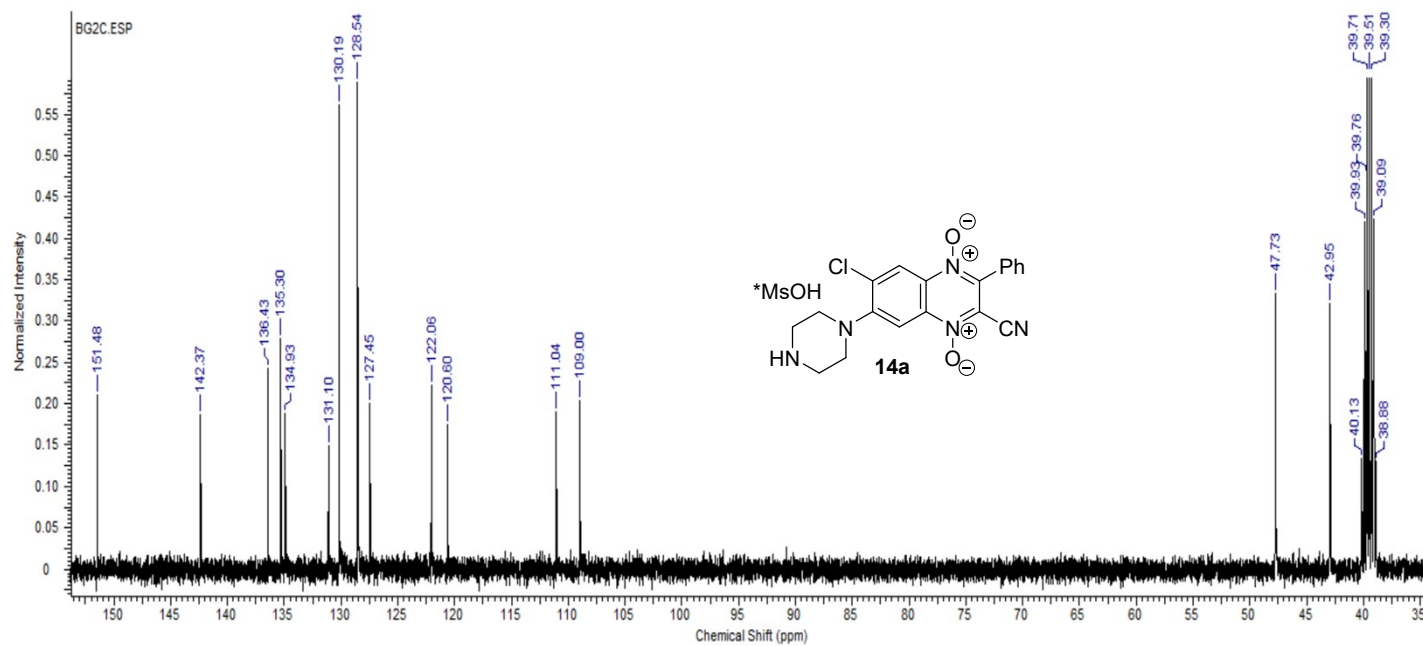

Figure S67. Copy of  $^1\text{H}$  NMR spectrum of the derivative **14b**.

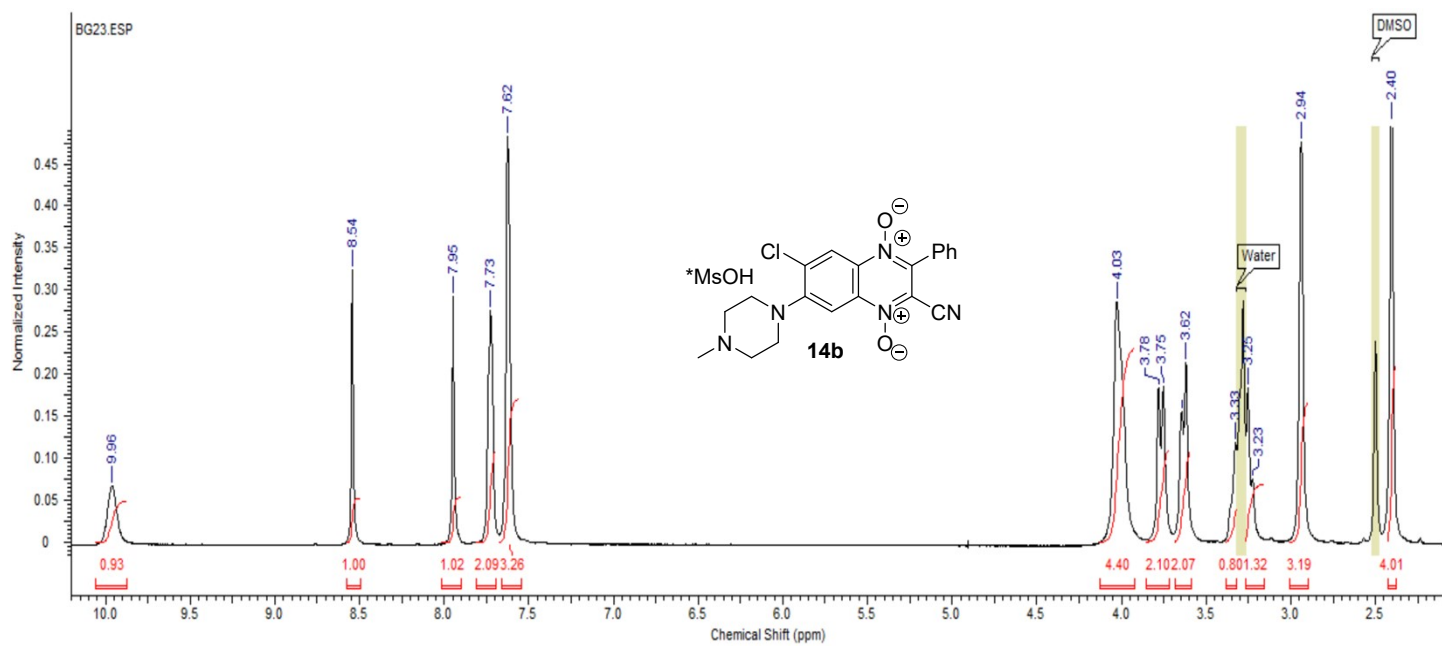

Figure S68. Copy of  $^{13}\text{C}$  NMR spectrum of the derivative **14b**.

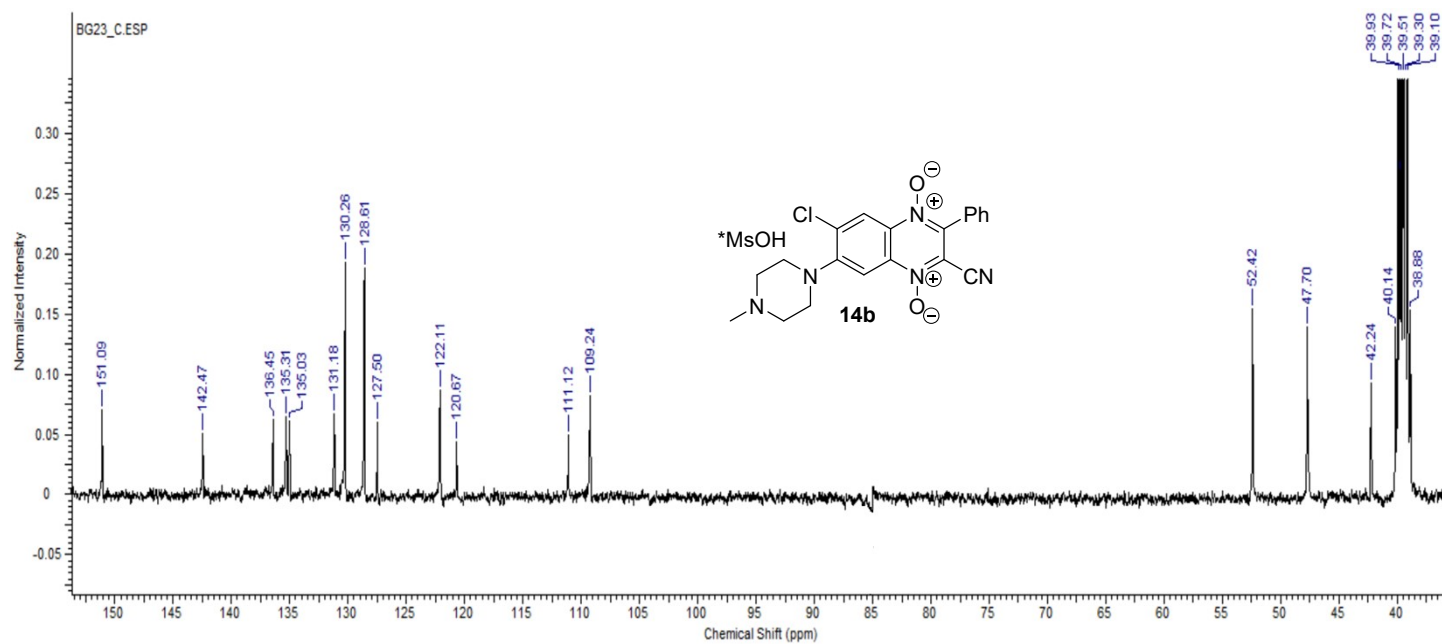

Figure S69. Copy of  $^1\text{H}$  NMR spectrum of the derivative **14g**.

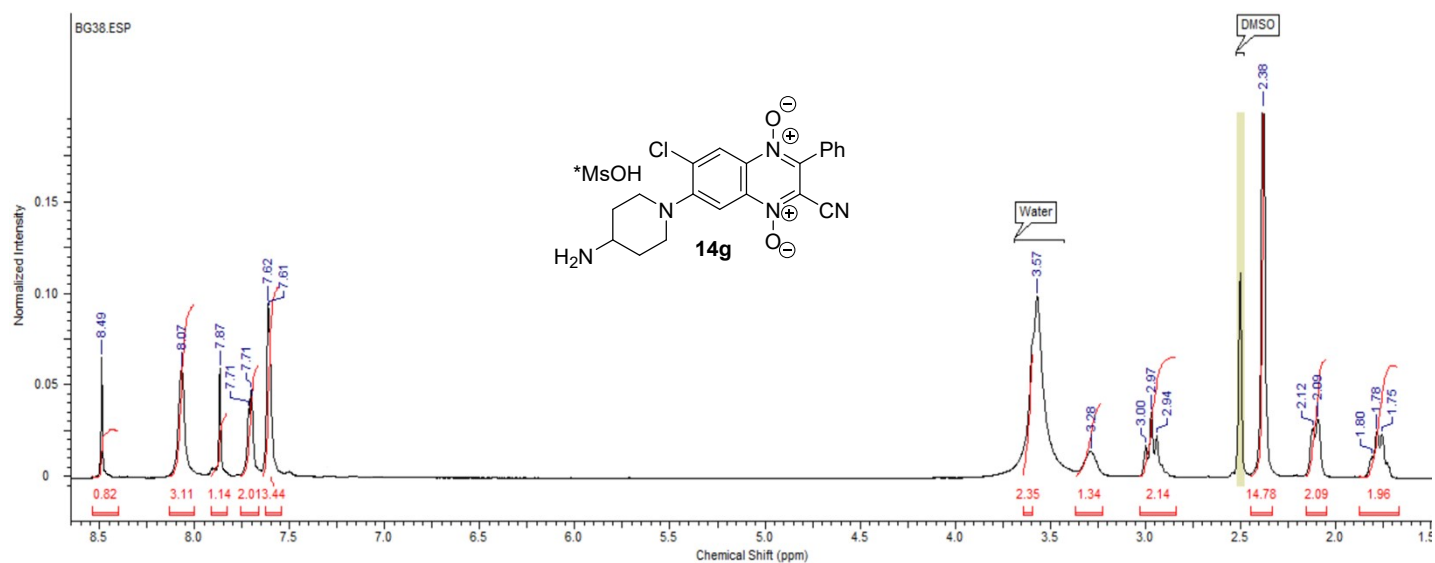

Figure S70. Copy of  $^{13}\text{C}$  NMR spectrum of the derivative **14g**.

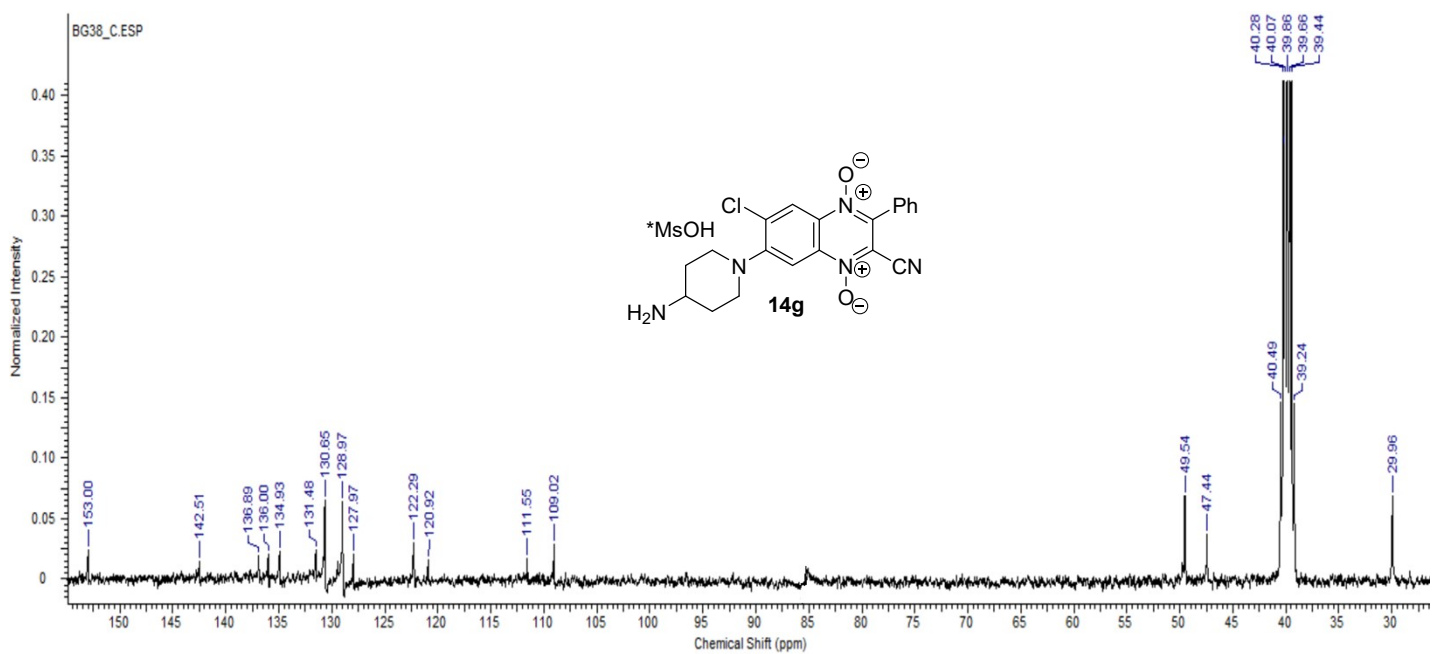

**Table S1.**  $^{13}\text{C}$  chemical shifts ( $\delta_{\text{C}}$ , ppm) and characteristic increments ( $I^{\text{C}}$ ) for the  $^{13}\text{C}$  chemical shift differences (relative to 3-phenylquinoxaline-2-carbonitrile 1,4-dioxide<sup>8</sup>) for the piperazine group for **4b–c** and **13–14a**.

| Position | <b>4b</b>                   |                | <b>4c</b>           |                | <b>13a</b>                  |                | <b>14a</b>          |                |
|----------|-----------------------------|----------------|---------------------|----------------|-----------------------------|----------------|---------------------|----------------|
|          | $\delta_{\text{C}}$ (J, Hz) | $I^{\text{C}}$ | $\delta_{\text{C}}$ | $I^{\text{C}}$ | $\delta_{\text{C}}$ (J, Hz) | $I^{\text{C}}$ | $\delta_{\text{C}}$ | $I^{\text{C}}$ |
| C-2      | 118.8                       | -1.6           | 119.4               | -1.0           | 120.5                       | +0.1           | 120.6               | +0.2           |
| C-3      | 142.9                       | +0.2           | 143.3               | +0.6           | 142.3                       | -0.4           | 142.4               | -0.3           |
| C-9      | 131.9 (10.7)                | -5.5           | 133.4               | -4.0           | 135.1                       | -2.3           | 136.4               | -1.0           |
| C-10     | 136.9                       | -2.5           | 138.6               | -0.8           | 130.8 (13.8)                | -8.6           | 135.3               | -4.1           |

### Copies of HRMS ESI Analysis

Figure S71. Copy of HRMS ESI analysis of the derivatives 6.

**+MS, 0.1-0.3min #(4-15)**

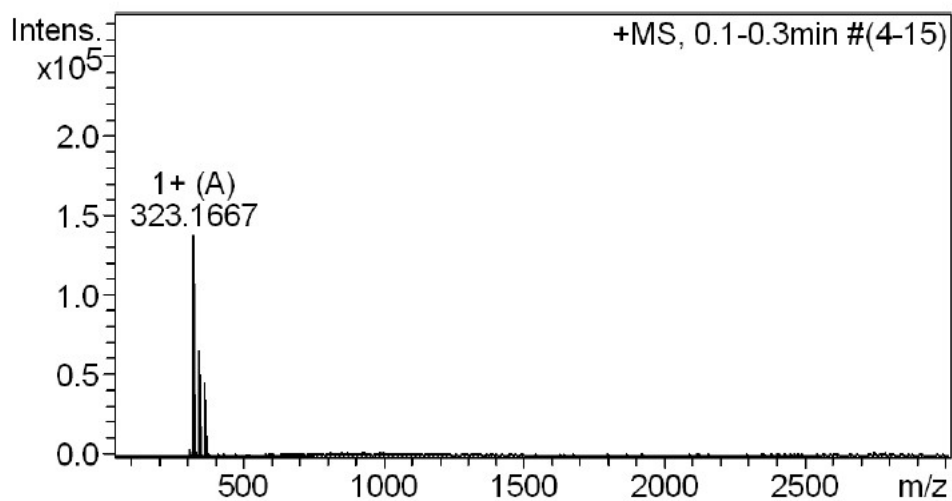

| # | m/z      | Res.  | S/N    | I      | I %   |
|---|----------|-------|--------|--------|-------|
| 1 | 323.1667 | 10491 | 1184.0 | 138173 | 100.0 |
| 2 | 324.1701 | 11068 | 245.2  | 28731  | 20.8  |
| 3 | 345.1481 | 12043 | 524.0  | 65562  | 47.4  |
| 4 | 346.1513 | 10555 | 86.1   | 10837  | 7.8   |
| 5 | 361.1235 | 10516 | 349.0  | 45655  | 33.0  |

Figure S72. Copy of HRMS ESI analysis of the derivatives 3.

**+MS, 0.1-0.3min #(4-17)**

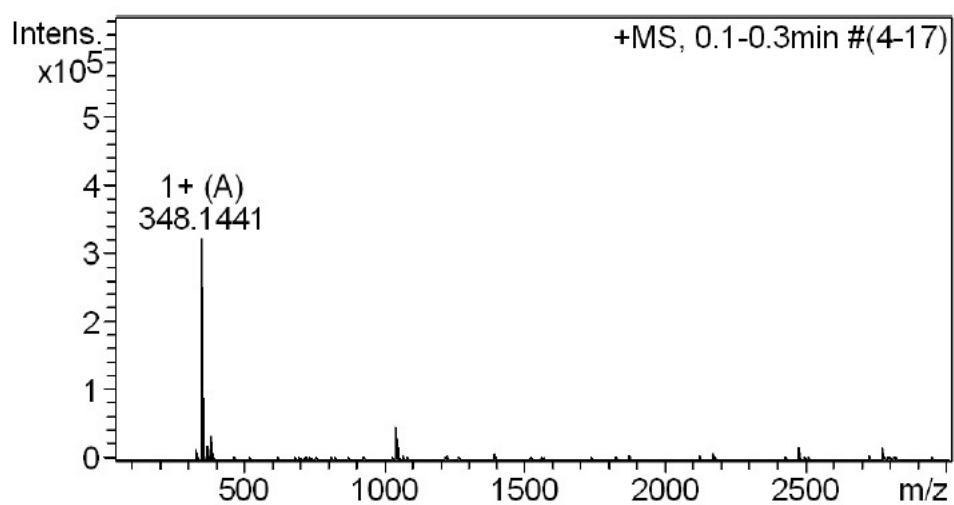

| # | m/z       | Res.  | S/N    | I      | I %   |
|---|-----------|-------|--------|--------|-------|
| 1 | 348.1441  | 10507 | 4549.4 | 323109 | 100.0 |
| 2 | 349.1470  | 10479 | 1005.8 | 71684  | 22.2  |
| 3 | 386.0987  | 11765 | 402.8  | 32340  | 10.0  |
| 4 | 1042.4199 | 12987 | 271.1  | 47264  | 14.6  |
| 5 | 1043.4241 | 11425 | 171.7  | 29963  | 9.3   |

Figure S73. Copy of HRMS ESI analysis of the derivatives **9a**.

**+MS, 0.2-0.9min #(10-54)**

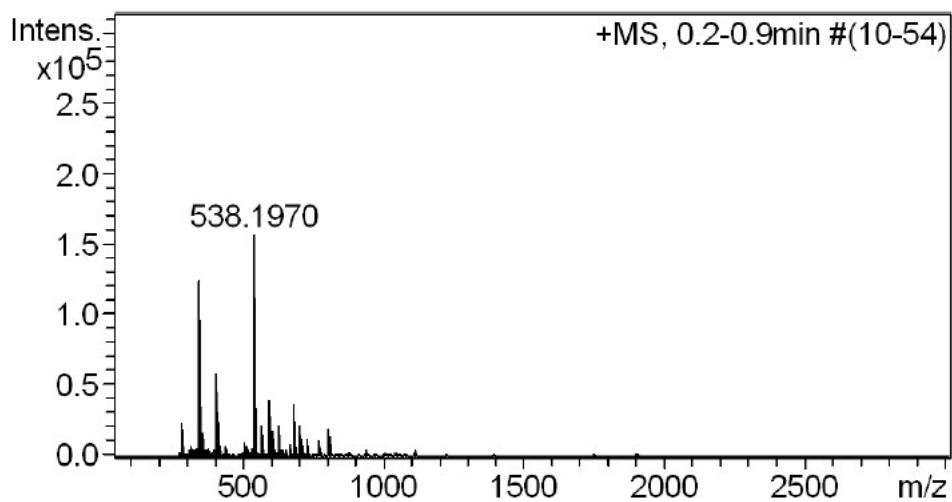

| #  | m/z      | Res. | S/N    | I      | I %   |
|----|----------|------|--------|--------|-------|
| 1  | 341.1615 | 6186 | 2400.5 | 124409 | 79.6  |
| 2  | 407.1279 | 6647 | 849.3  | 58537  | 37.4  |
| 3  | 537.6982 | 7465 | 434.7  | 44717  | 28.6  |
| 4  | 538.1970 | 7409 | 1520.7 | 156325 | 100.0 |
| 5  | 538.6981 | 7474 | 833.3  | 85759  | 54.9  |
| 6  | 539.1972 | 7466 | 1031.7 | 106137 | 67.9  |
| 7  | 539.6984 | 7516 | 501.9  | 51691  | 33.1  |
| 8  | 540.1958 | 7498 | 451.8  | 46536  | 29.8  |
| 9  | 596.5933 | 7646 | 388.5  | 39528  | 25.3  |
| 10 | 681.3122 | 7832 | 364.0  | 36324  | 23.2  |



**Figure S74.** Copy of HRMS ESI analysis of the derivatives **9c**.

**+MS, 0.0-0.1min #(2-6)**

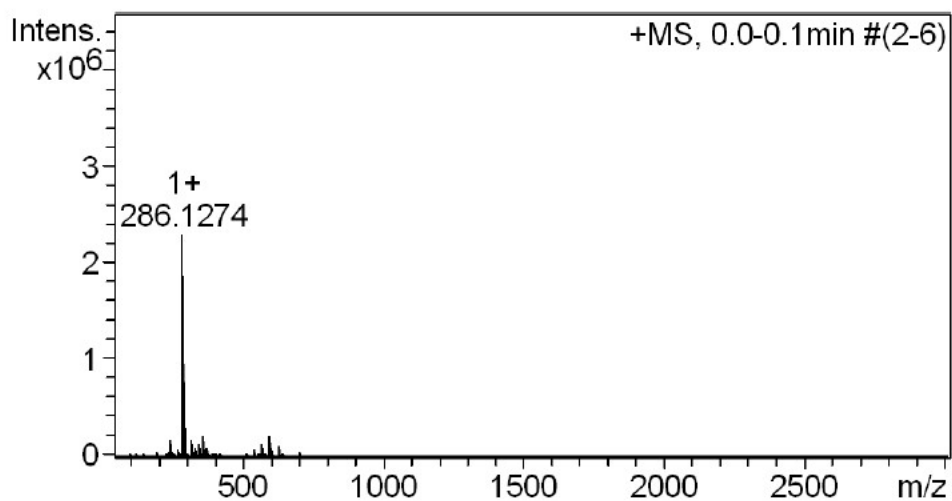

| #  | m/z      | Res.  | S/N    | I       | I %   |
|----|----------|-------|--------|---------|-------|
| 1  | 241.0994 | 8849  | 279.4  | 165378  | 7.2   |
| 2  | 285.5196 | 7452  | 465.7  | 337865  | 14.8  |
| 3  | 285.6874 | 5215  | 237.4  | 172574  | 7.5   |
| 4  | 285.8654 | 4690  | 206.7  | 150411  | 6.6   |
| 5  | 286.1274 | 13215 | 3150.3 | 2288924 | 100.0 |
| 6  | 287.1255 | 10478 | 1296.2 | 945975  | 41.3  |
| 7  | 314.3248 | 10264 | 184.3  | 150065  | 6.6   |
| 8  | 358.3499 | 10242 | 231.7  | 200397  | 8.8   |
| 9  | 568.5367 | 10931 | 217.6  | 114785  | 5.0   |
| 10 | 596.5670 | 11585 | 403.2  | 197296  | 8.6   |

Figure S75. Copy of HRMS ESI analysis of the derivatives **9d**.

+MS, 0.1-0.3min #(4-18)

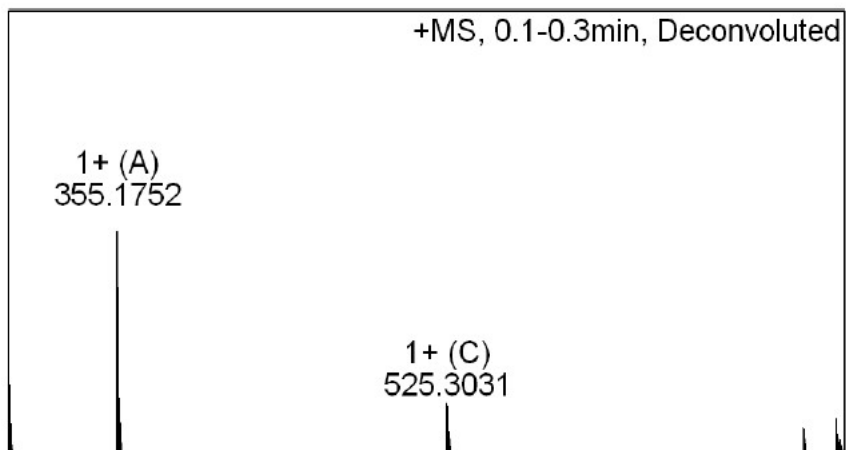

| # | m/z      | Res. | S/N | I     | I%    |
|---|----------|------|-----|-------|-------|
| 1 | 299.1131 |      |     | 28241 | 35.4  |
| 2 | 355.1752 |      |     | 79705 | 100.0 |
| 3 | 525.3031 |      |     | 16442 | 20.6  |
| 4 | 709.3426 |      |     | 8367  | 10.5  |
| 5 | 726.3561 |      |     | 11800 | 14.8  |

Figure S76. Copy of HRMS ESI analysis of the derivatives **9e**.

**+MS, 0.0-0.1min #(2-6)**

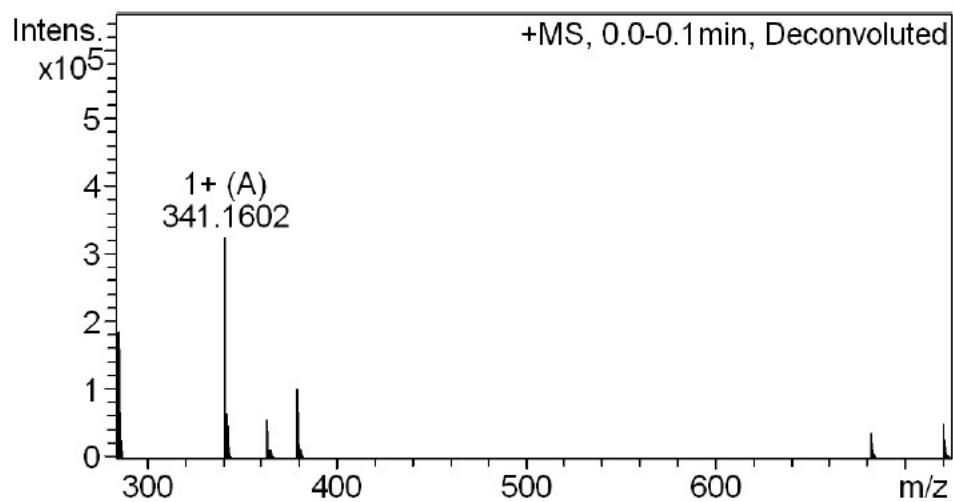

| # | m/z      | Res. | S/N | I      | I %   |
|---|----------|------|-----|--------|-------|
| 1 | 285.1067 |      |     | 188810 | 57.6  |
| 2 | 341.1602 |      |     | 328025 | 100.0 |
| 3 | 363.1260 |      |     | 57258  | 17.5  |
| 4 | 379.1140 |      |     | 102691 | 31.3  |
| 5 | 681.3132 |      |     | 36198  | 11.0  |
| 6 | 719.2680 |      |     | 50911  | 15.5  |

**Figure S77.** Copy of HRMS ESI analysis of the derivatives **9f**.

**+MS, 0.0-0.1min #(2-8)**

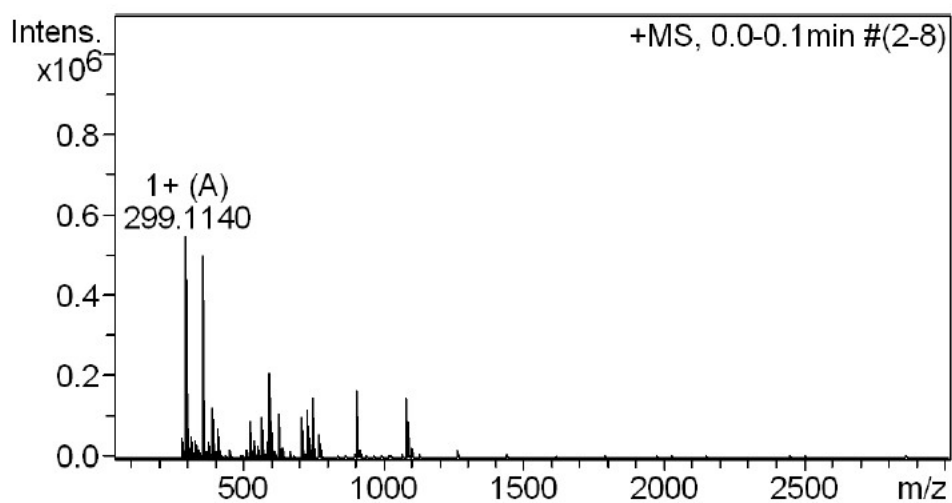

| #  | m/z       | Res. | S/N    | I      | I %   | FWHM   |
|----|-----------|------|--------|--------|-------|--------|
| 1  | 299.1140  | 5083 | 4484.2 | 546241 | 100.0 | 0.0588 |
| 2  | 355.1753  | 5514 | 3231.3 | 498293 | 91.2  | 0.0644 |
| 3  | 358.3645  | 6013 | 894.1  | 138079 | 25.3  | 0.0596 |
| 4  | 393.1296  | 6251 | 794.2  | 123863 | 22.7  | 0.0629 |
| 5  | 596.5926  | 7055 | 1300.8 | 208096 | 38.1  | 0.0846 |
| 6  | 747.2982  | 7569 | 944.9  | 144953 | 26.5  | 0.0987 |
| 7  | 905.4062  | 7959 | 1232.3 | 167370 | 30.6  | 0.1138 |
| 8  | 905.9061  | 8107 | 1201.1 | 163081 | 29.9  | 0.1117 |
| 9  | 1082.4914 | 8141 | 1002.7 | 127968 | 23.4  | 0.1330 |
| 10 | 1082.9904 | 8502 | 1132.3 | 144472 | 26.4  | 0.1274 |

Figure S78. Copy of HRMS ESI analysis of the derivatives **9g**.

**+MS, 0.1-0.9min #(5-56)**

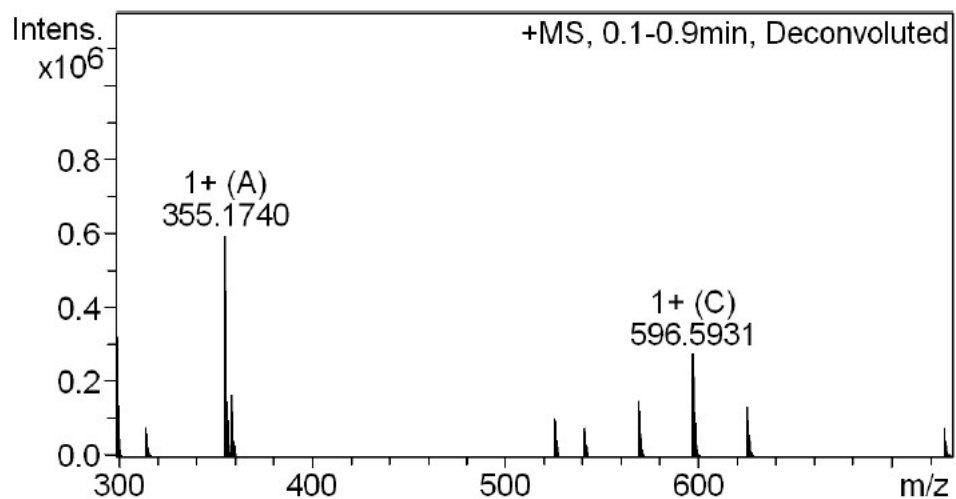

| #  | m/z      | Res. | S/N | I      | I %   |
|----|----------|------|-----|--------|-------|
| 1  | 299.1118 |      |     | 375742 | 62.7  |
| 2  | 314.3364 |      |     | 81458  | 13.6  |
| 3  | 355.1740 |      |     | 599323 | 100.0 |
| 4  | 358.3635 |      |     | 174195 | 29.1  |
| 5  | 525.3037 |      |     | 105914 | 17.7  |
| 6  | 540.5301 |      |     | 79141  | 13.2  |
| 7  | 568.5614 |      |     | 153397 | 25.6  |
| 8  | 596.5931 |      |     | 279540 | 46.6  |
| 9  | 624.6231 |      |     | 136199 | 22.7  |
| 10 | 726.3692 |      |     | 78817  | 13.2  |

Figure S79. Copy of HRMS ESI analysis of the derivatives **9h**.

**+MS, 0.0-0.1min #(2-8)**

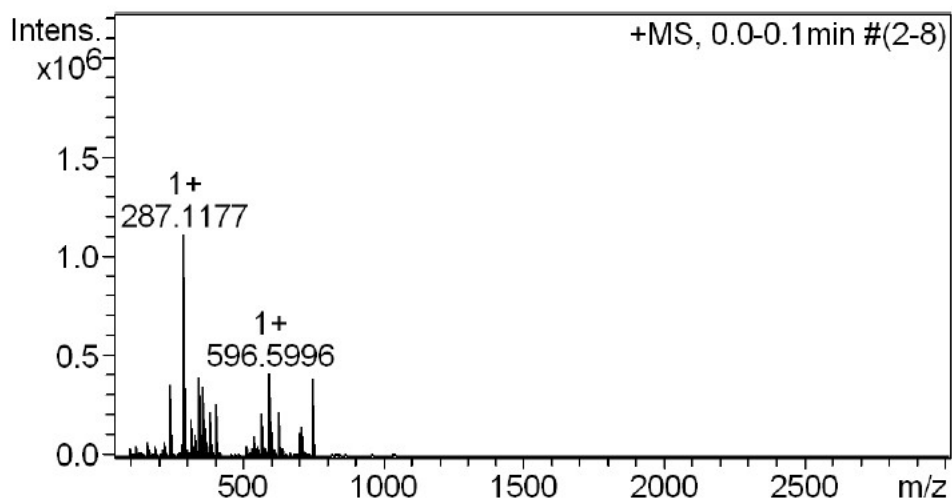

| #  | m/z      | I       | I %   |
|----|----------|---------|-------|
| 1  | 243.1273 | 349825  | 31.6  |
| 2  | 287.1177 | 1107864 | 100.0 |
| 3  | 343.1791 | 395890  | 35.7  |
| 4  | 358.3692 | 347849  | 31.4  |
| 5  | 381.1345 | 220083  | 19.9  |
| 6  | 405.1004 | 258392  | 23.3  |
| 7  | 568.5675 | 213342  | 19.3  |
| 8  | 596.5996 | 411364  | 37.1  |
| 9  | 624.6299 | 216912  | 19.6  |
| 10 | 747.2730 | 381052  | 34.4  |

Figure S80. Copy of HRMS ESI analysis of the derivatives **10a**.

**+MS, 0.1-0.3min #(4-18)**

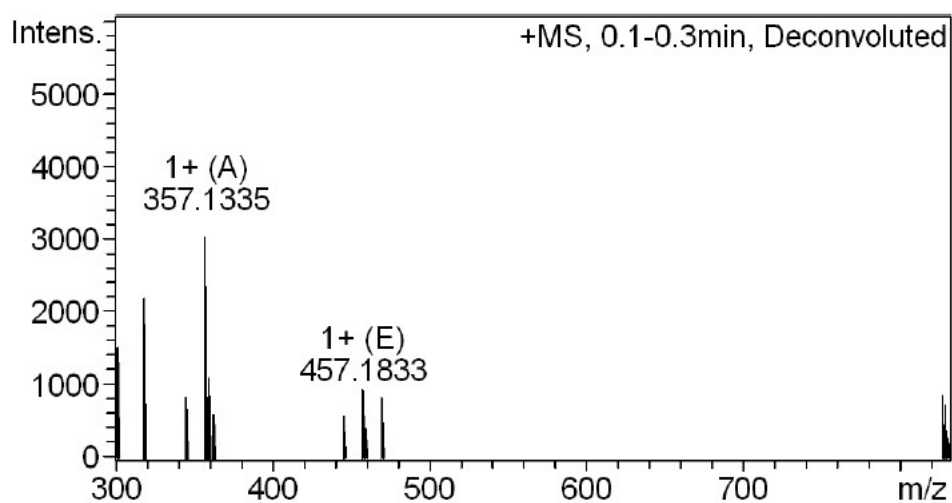

| #  | m/z      | Res. | S/N | I    | I %   |
|----|----------|------|-----|------|-------|
| 1  | 301.0711 |      |     | 1611 | 49.1  |
| 2  | 318.3005 |      |     | 2422 | 73.8  |
| 3  | 345.0605 |      |     | 866  | 26.4  |
| 4  | 357.1335 |      |     | 3283 | 100.0 |
| 5  | 359.1312 |      |     | 1155 | 35.2  |
| 6  | 362.3269 |      |     | 670  | 20.4  |
| 7  | 457.1833 |      |     | 951  | 29.0  |
| 8  | 469.1845 |      |     | 872  | 26.6  |
| 9  | 825.3071 |      |     | 888  | 27.0  |
| 10 | 827.3023 |      |     | 755  | 23.0  |

Figure S81. Copy of HRMS ESI analysis of the derivatives **10g**.

**+MS, 0.1-0.3min #(4-17)**

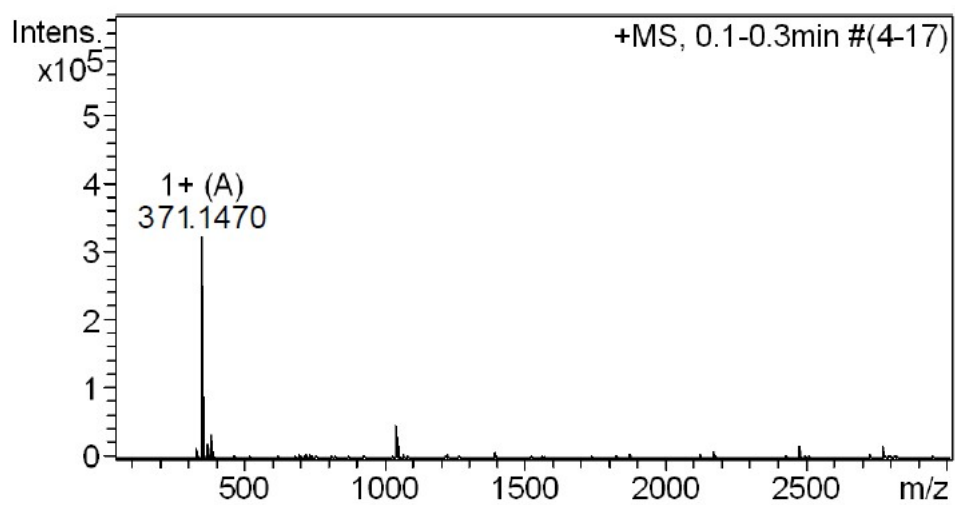

| # | m/z       | Res.  | S/N    | I      | I %   |
|---|-----------|-------|--------|--------|-------|
| 1 | 371.1470  | 10507 | 4549.4 | 323109 | 100.0 |
| 2 | 349.4199  | 10479 | 1005.8 | 71684  | 22.2  |
| 3 | 386.0987  | 11765 | 402.8  | 32340  | 10.0  |
| 4 | 1042.2873 | 12987 | 271.1  | 47264  | 14.6  |
| 5 | 1043.4241 | 11425 | 171.7  | 29963  | 9.3   |



Figure S82. Copy of HRMS ESI analysis of the derivatives 6.

+MS, 0.1-0.5min #(5-27)

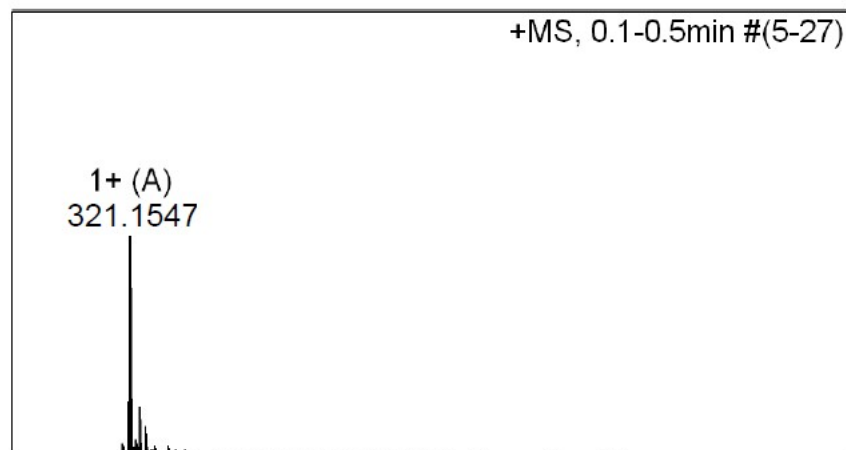

| # | m/z      | Res. | S/N    | I     | I %   |
|---|----------|------|--------|-------|-------|
| 1 | 321.1547 | 8146 | 1447.4 | 26111 | 100.0 |
| 2 | 323.1701 | 8022 | 346.5  | 6118  | 23.4  |
| 3 | 324.1739 | 7723 | 266.2  | 4855  | 18.6  |
| 4 | 345.1506 | 7926 | 241.0  | 5371  | 20.6  |

**Figure S83.** Copy of HRMS ESI analysis of the derivatives **11a**.

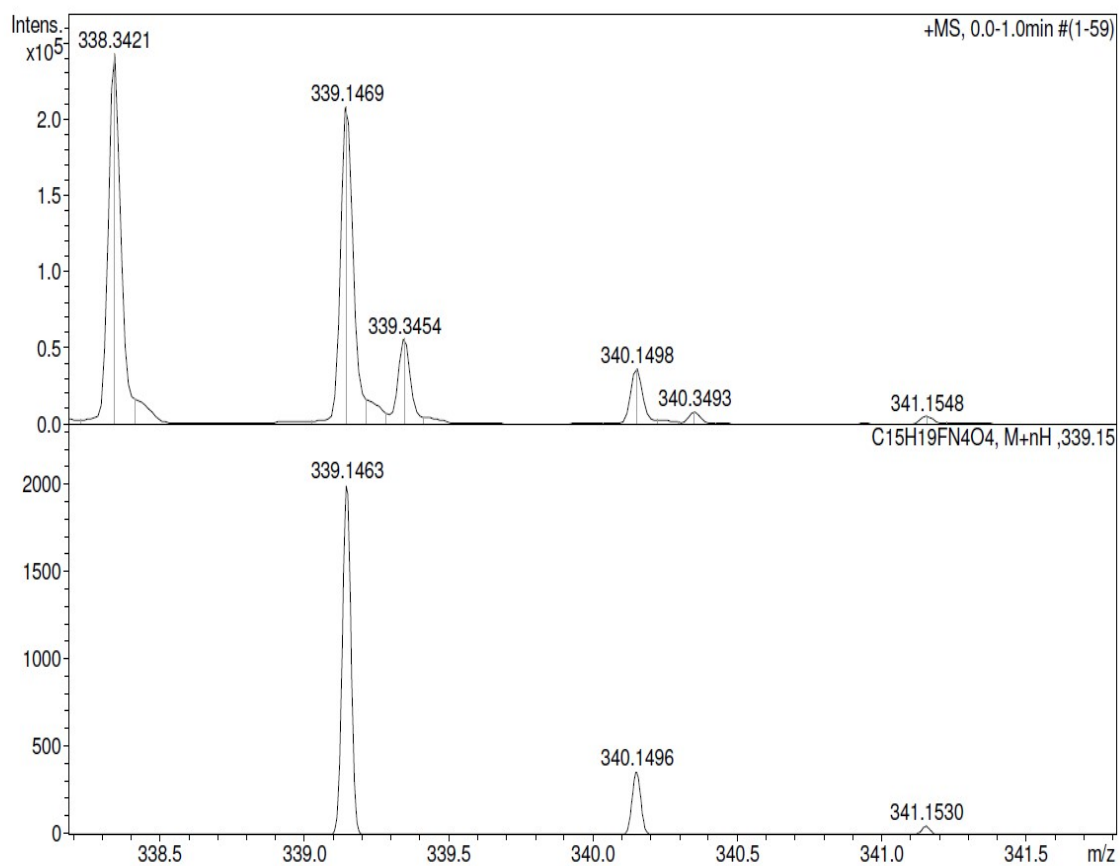

**Figure S84.** Copy of HRMS ESI analysis of the derivatives **11b**.

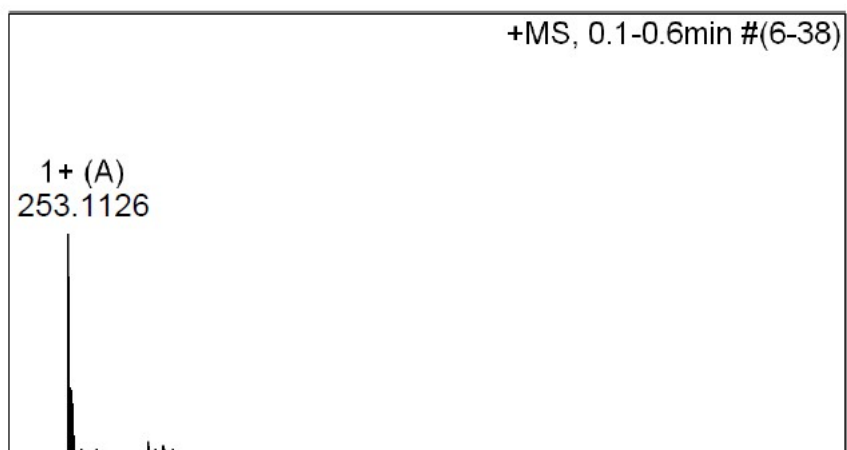

| # | m/z      | I     | I %   |
|---|----------|-------|-------|
| 1 | 253.1126 | 43917 | 100.0 |
| 2 | 254.1153 | 5964  | 13.6  |
| 3 | 255.1264 | 2900  | 6.6   |
| 4 | 269.1068 | 12812 | 29.2  |
| 5 | 270.1115 | 1830  | 4.2   |
| 6 | 537.2022 | 2520  | 5.7   |
| 7 | 596.5955 | 1875  | 4.3   |

**Figure S85.** Copy of HRMS ESI analysis of the derivatives **11c**.

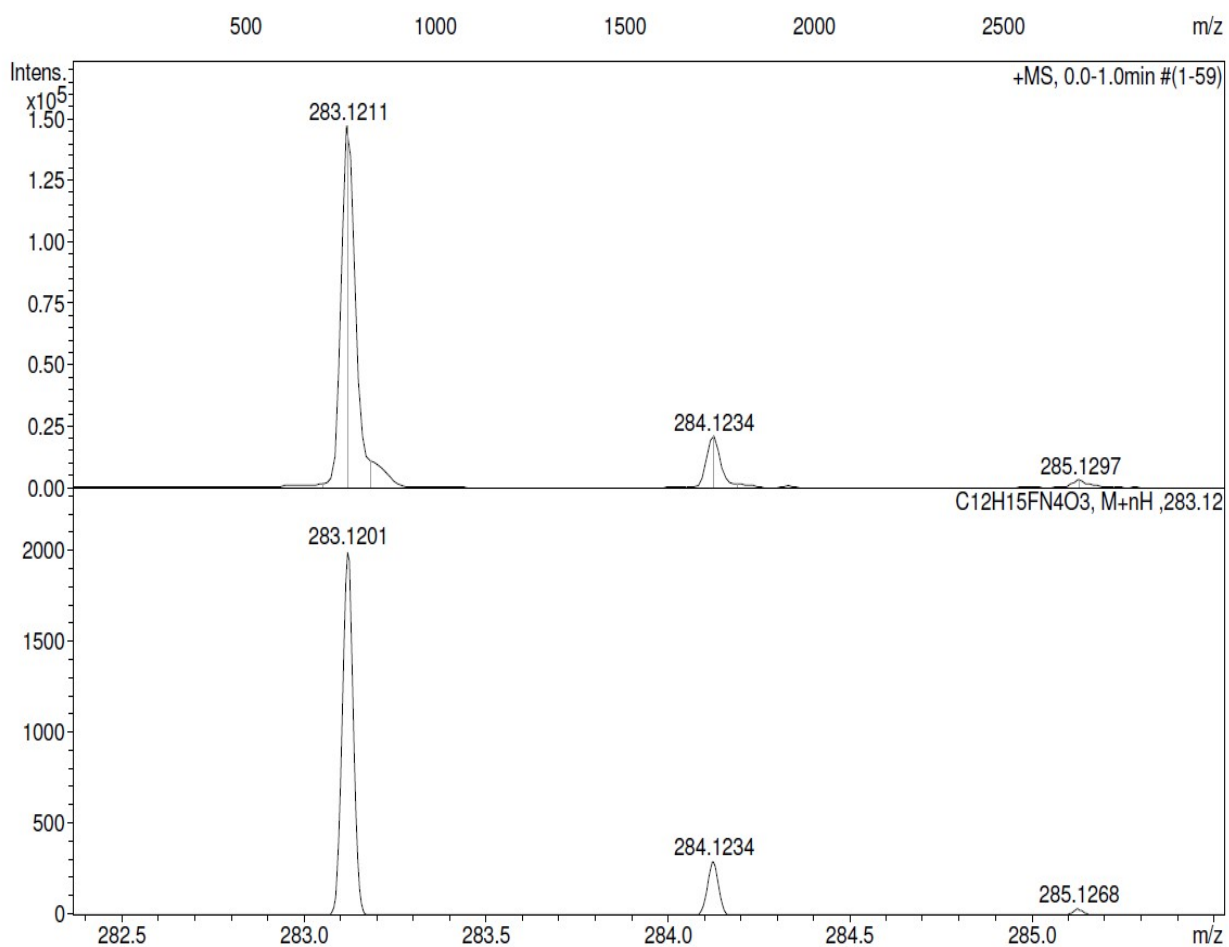

**Figure S86.** Copy of HRMS ESI analysis of the derivatives **11d**.

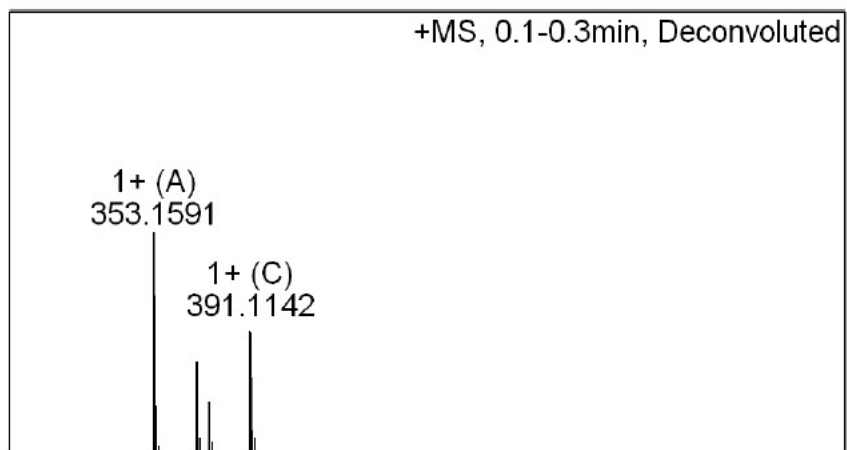

| # | m/z      | Res. | S/N | I    | I%    |
|---|----------|------|-----|------|-------|
| 1 | 353.1591 |      |     | 7416 | 100.0 |
| 2 | 370.1853 |      |     | 3472 | 46.8  |
| 3 | 375.1400 |      |     | 1736 | 23.4  |
| 4 | 391.1142 |      |     | 4330 | 58.4  |

**Figure S87.** Copy of HRMS ESI analysis of the derivatives **11e**.

**+MS, 0.1-0.5min #(7-27)**

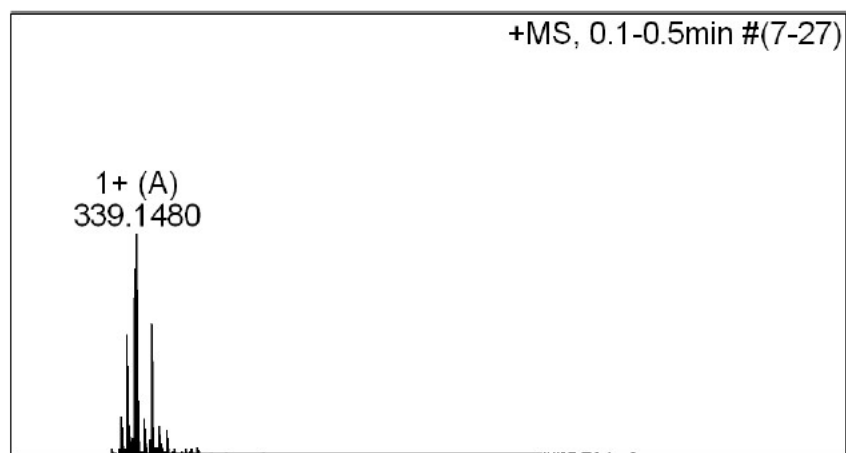

| # | m/z      | Res. | S/N   | I     | I %   |
|---|----------|------|-------|-------|-------|
| 1 | 319.0638 | 7519 | 388.8 | 7650  | 54.1  |
| 2 | 339.1480 | 7736 | 588.8 | 14134 | 100.0 |
| 3 | 375.1244 | 7834 | 270.8 | 8437  | 59.7  |
| 4 | 377.1115 | 7654 | 176.6 | 5521  | 39.1  |

**Figure S88.** Copy of HRMS ESI analysis of the derivatives **11f**.

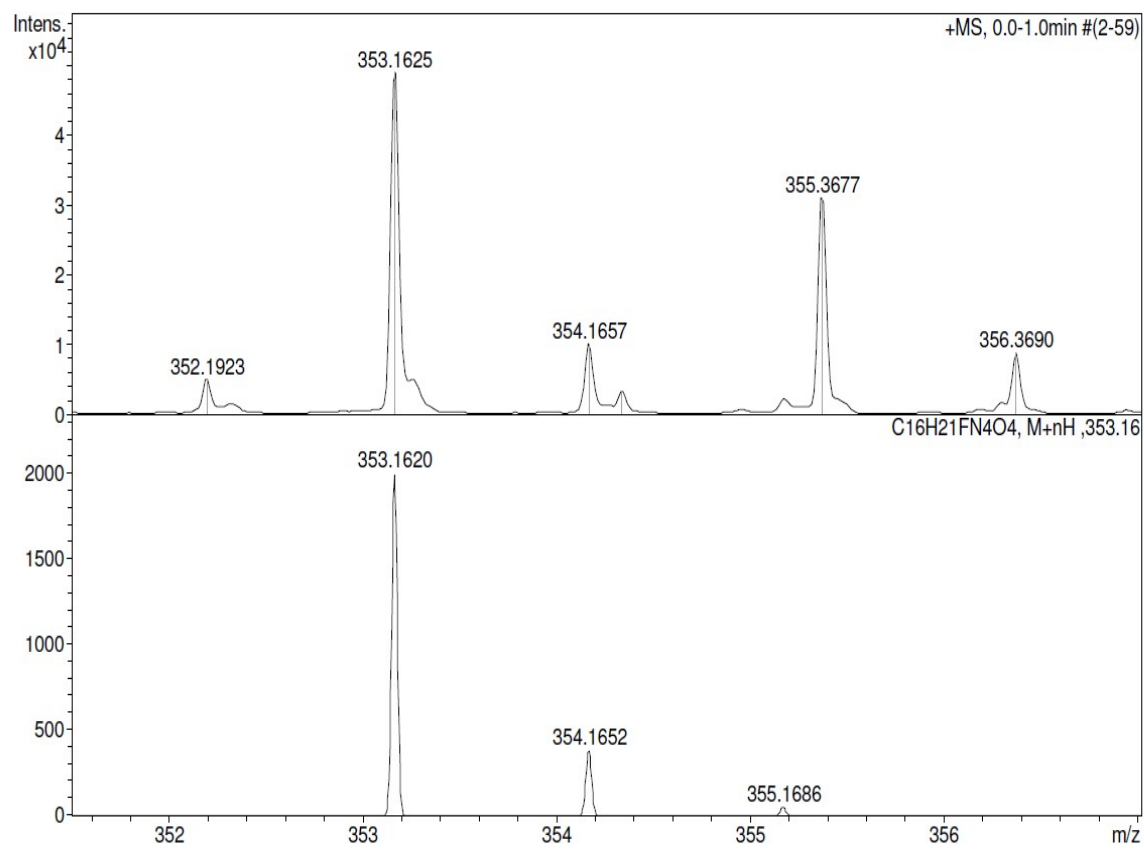

**Figure S89.** Copy of HRMS ESI analysis of the derivatives **11g**.

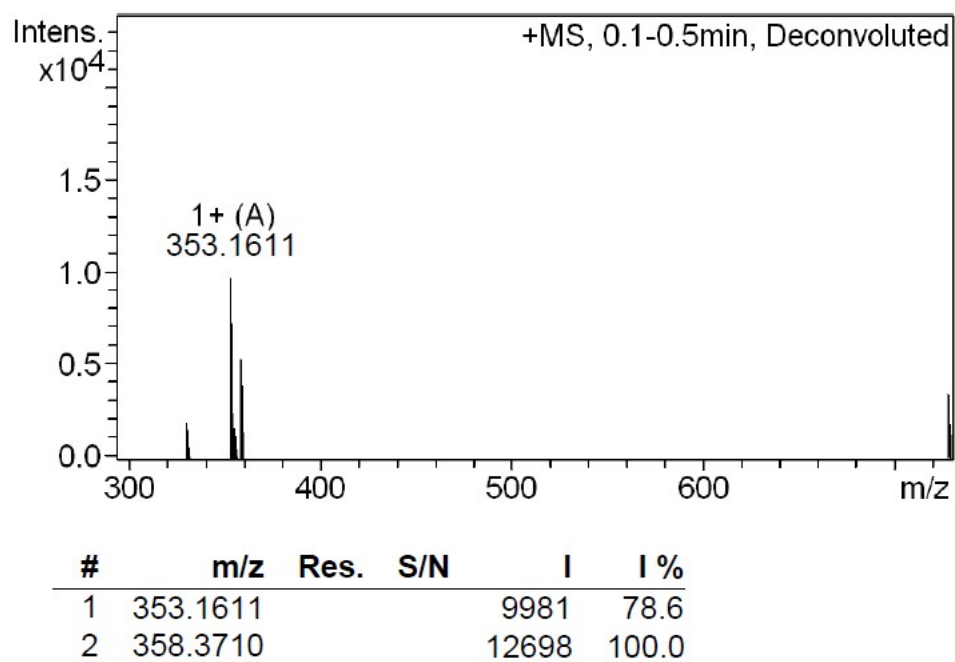



Figure S90. Copy of HRMS ESI analysis of the derivatives **11h**.

+MS, 0.1-0.5min #(5-27)

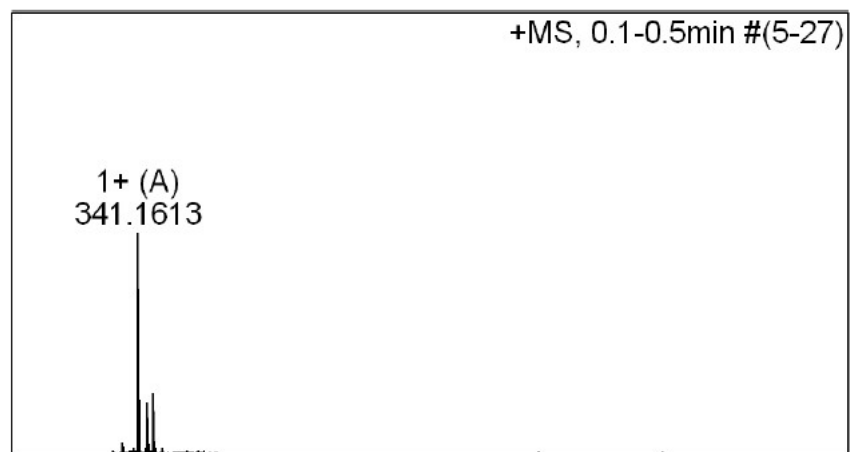

| # | m/z      | Res. | S/N    | I     | I %   |
|---|----------|------|--------|-------|-------|
| 1 | 341.1613 | 8349 | 1862.3 | 49932 | 100.0 |
| 2 | 342.1639 | 8044 | 338.7  | 9166  | 18.4  |
| 3 | 363.1412 | 8508 | 364.5  | 11685 | 23.4  |
| 4 | 379.1153 | 8442 | 395.1  | 13837 | 27.7  |

**Figure S91.** Copy of HRMS ESI analysis of the derivatives **12a**.

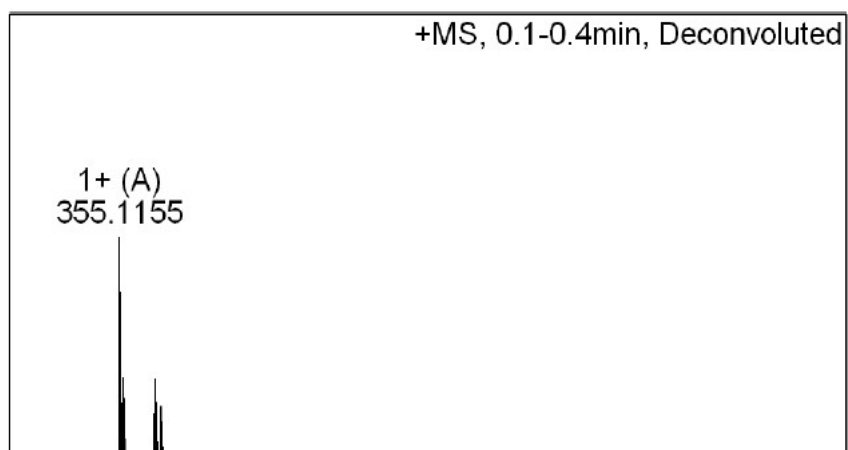

| # | m/z      | Res. | S/N | I     | I%    |
|---|----------|------|-----|-------|-------|
| 1 | 355.1155 |      |     | 69565 | 100.0 |
| 2 | 357.1136 |      |     | 25547 | 36.7  |
| 3 | 374.1391 |      |     | 24889 | 35.8  |
| 4 | 377.0968 |      |     | 16095 | 23.1  |

Figure S92. Copy of HRMS ESI analysis of the derivatives **12b**.

+MS, 0.2-2.0min #(11-120)

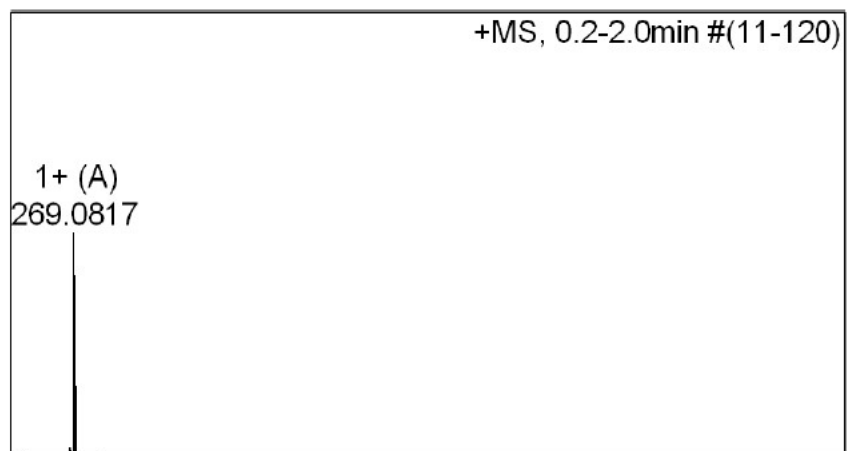

| # | m/z      | I       | I %   |
|---|----------|---------|-------|
| 1 | 258.1736 | 32261   | 2.6   |
| 2 | 269.0817 | 1258314 | 100.0 |
| 3 | 270.0831 | 150913  | 12.0  |
| 4 | 271.0792 | 381093  | 30.3  |
| 5 | 272.0813 | 50373   | 4.0   |

**Figure S93.** Copy of HRMS ESI analysis of the derivatives **12g**.

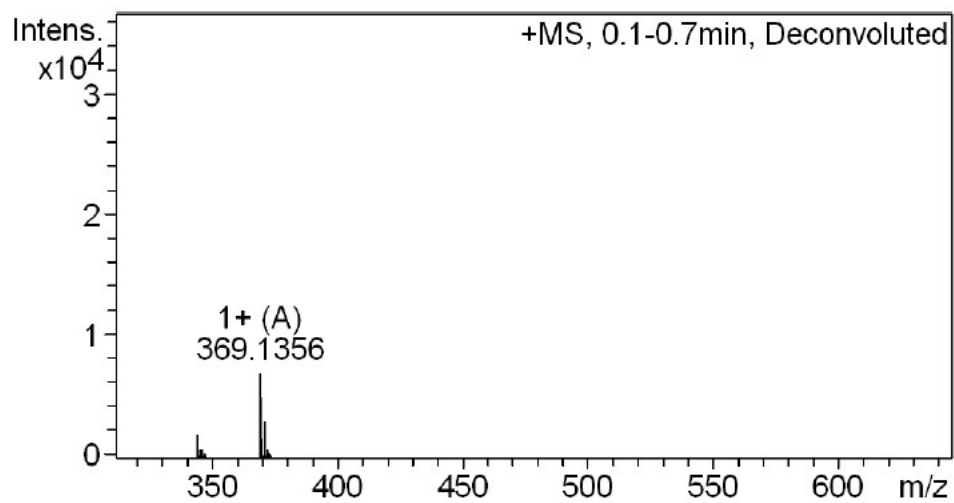

| # | m/z      | Res. | S/N | I    | I%    |
|---|----------|------|-----|------|-------|
| 1 | 369.1356 |      |     | 7297 | 100.0 |
| 2 | 371.1334 |      |     | 2917 | 15.9  |

Figure S94. Copy of HRMS ESI analysis of the derivatives **13a**.

**+MS, 0.0-0.2min #(2-11)**

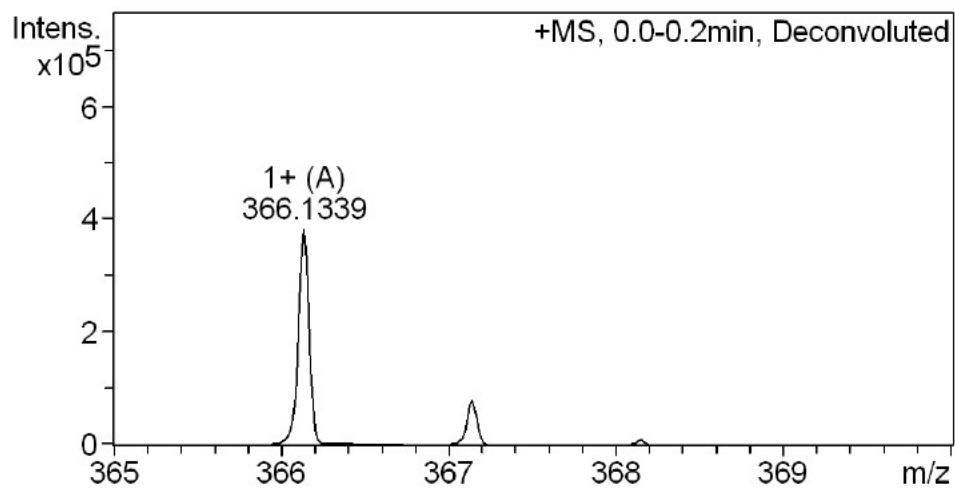

| # | m/z      | Res. | S/N    | I     | I% |
|---|----------|------|--------|-------|----|
| 1 | 366.1339 |      | 384624 | 100.0 |    |

Figure S95. Copy of HRMS ESI analysis of the derivatives **13b**.

**+MS, 0.0-0.2min #(2-12)**

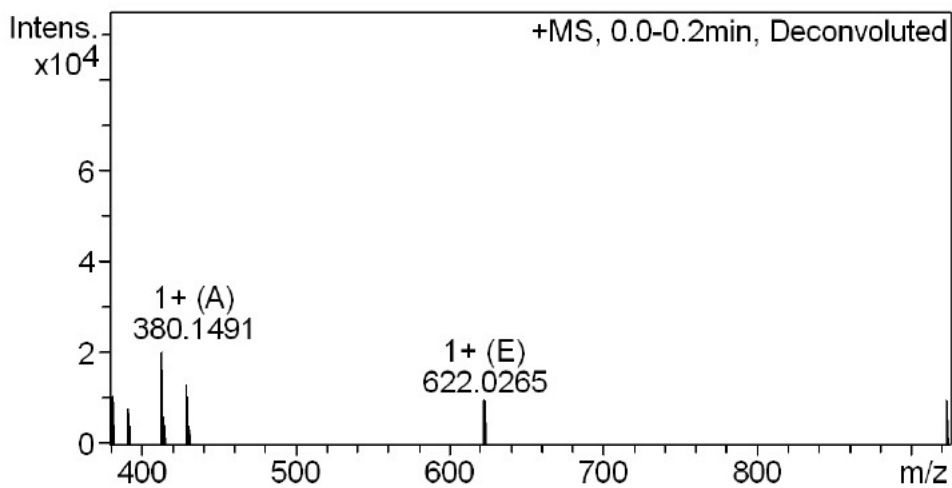

| # | m/z      | Res. | S/N | I     | I %   |
|---|----------|------|-----|-------|-------|
| 1 | 380.1488 |      |     | 49242 | 100.0 |
| 2 | 391.2805 |      |     | 7882  | 16.0  |
| 3 | 413.2630 |      |     | 20647 | 41.9  |
| 4 | 429.2354 |      |     | 13356 | 27.1  |
| 5 | 622.0265 |      |     | 9571  | 19.4  |
| 6 | 922.0062 |      |     | 10780 | 21.9  |

Figure S96. Copy of HRMS ESI analysis of the derivatives 13c.

+MS, 0.0-0.2min #(2-12)

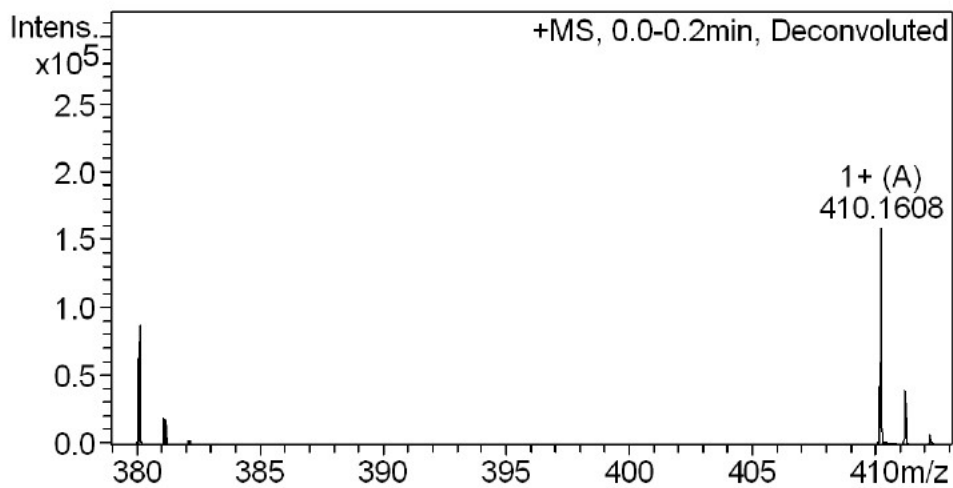

| # | m/z      | Res. | S/N | I      | I%    |
|---|----------|------|-----|--------|-------|
| 1 | 380.1504 |      |     | 87953  | 55.1  |
| 2 | 410.1608 |      |     | 159636 | 100.0 |

Figure S97. Copy of HRMS ESI analysis of the derivatives **13d**.

**+MS, 0.0-0.2min #(2-12)**

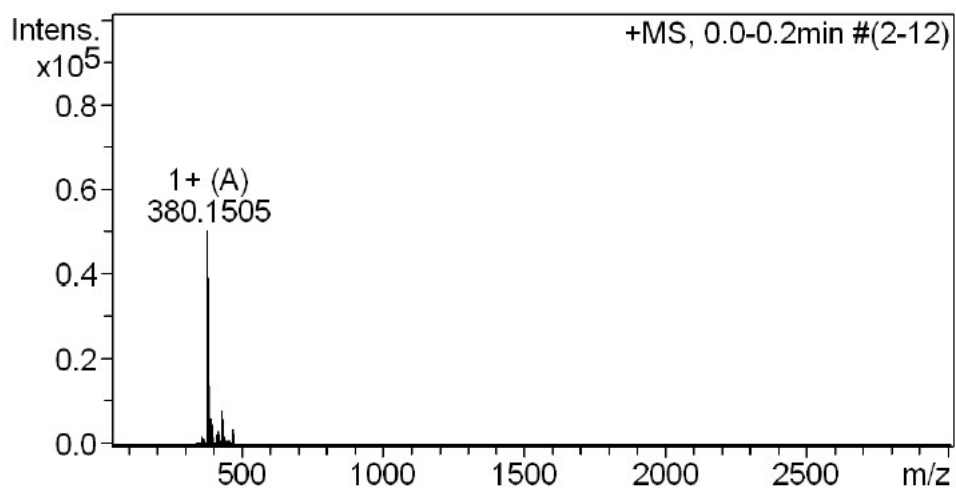

| # | m/z      | Res.  | S/N   | I     | I %   |
|---|----------|-------|-------|-------|-------|
| 1 | 380.1505 | 8777  | 975.2 | 50279 | 100.0 |
| 2 | 381.1529 | 6749  | 214.3 | 11104 | 22.1  |
| 3 | 391.2816 | 7260  | 112.7 | 6061  | 12.1  |
| 4 | 413.2659 | 7579  | 40.4  | 2356  | 4.7   |
| 5 | 421.1741 | 10829 | 50.0  | 2985  | 5.9   |
| 6 | 429.2353 | 7645  | 127.1 | 7741  | 15.4  |



**Figure S98.** Copy of HRMS ESI analysis of the derivatives **13e**.

**+MS, 0.0-0.3min #(2-16)**

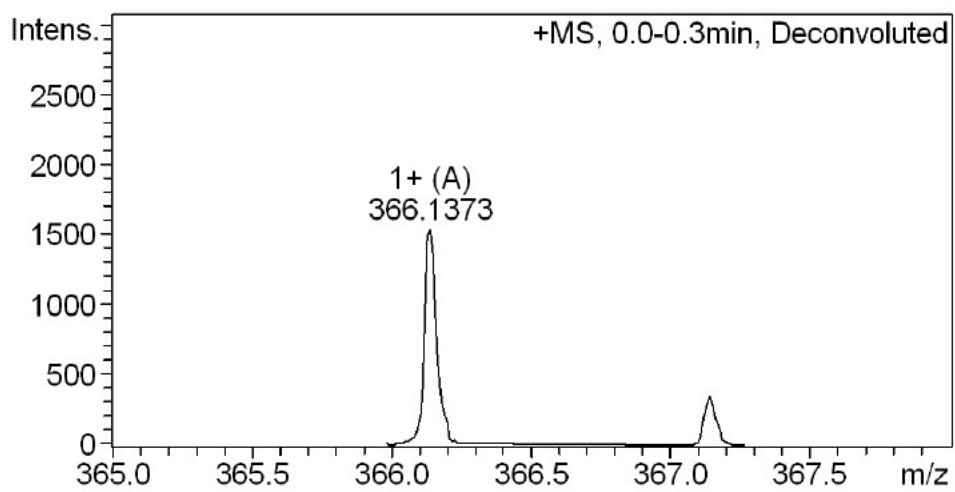

| # | m/z      | Res. | S/N | I    | I%    |
|---|----------|------|-----|------|-------|
| 1 | 366.1373 |      |     | 1545 | 100.0 |

Figure S99. Copy of HRMS ESI analysis of the derivatives 13f.

+MS, 0.0-0.2min #(2-12)

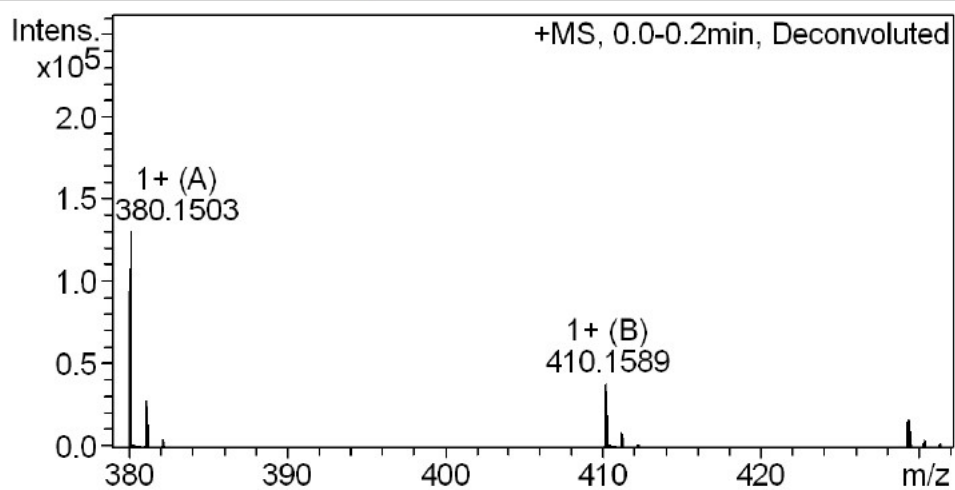

| # | m/z      | Res. | S/N | I      | I%    |
|---|----------|------|-----|--------|-------|
| 1 | 380.1501 |      |     | 131624 | 100.0 |
| 2 | 410.1589 |      |     | 41115  | 31.2  |
| 3 | 429.2359 |      |     | 17399  | 13.2  |

**Figure S100.** Copy of HRMS ESI analysis of the derivatives **13g**.

**+MS, 0.1-0.2min #(3-12)**

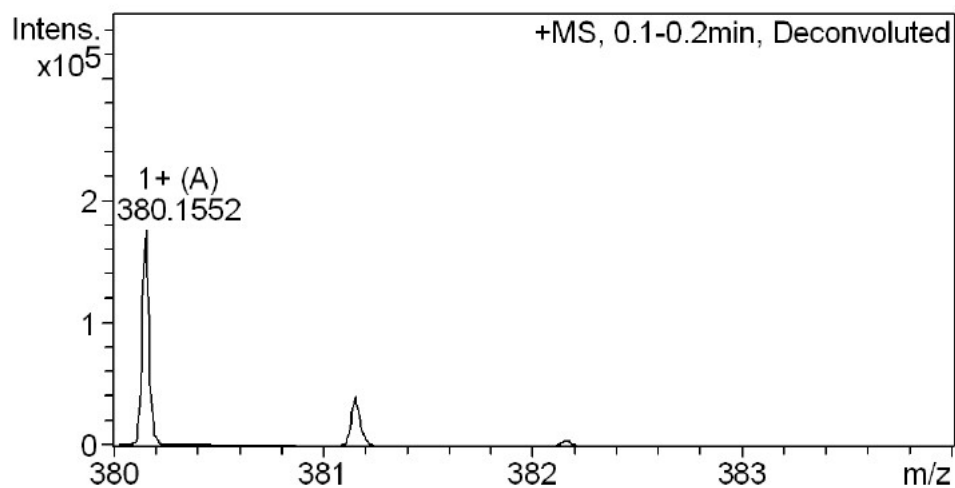

| # | m/z      | Res. | S/N | I      | I%    |
|---|----------|------|-----|--------|-------|
| 1 | 380.1544 |      |     | 185072 | 100.0 |

**Figure S101.** Copy of HRMS ESI analysis of the derivatives **13h**.

**+MS, 0.0-0.2min #(2-11)**

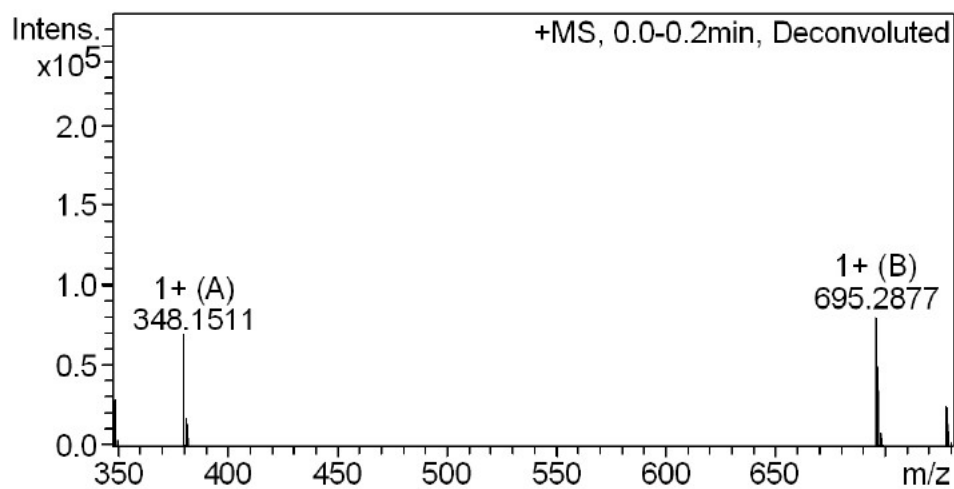

| # | m/z      | Res. | S/N | I      | I%    |
|---|----------|------|-----|--------|-------|
| 1 | 348.1507 |      |     | 135065 | 100.0 |
| 2 | 380.1568 |      |     | 72628  | 53.8  |
| 3 | 695.2877 |      |     | 81033  | 60.0  |
| 4 | 727.2929 |      |     | 24782  | 18.3  |

**Figure S102.** Copy of HRMS ESI analysis of the derivatives **14a**.

**+MS, 0.1-0.3min #(3-16)**

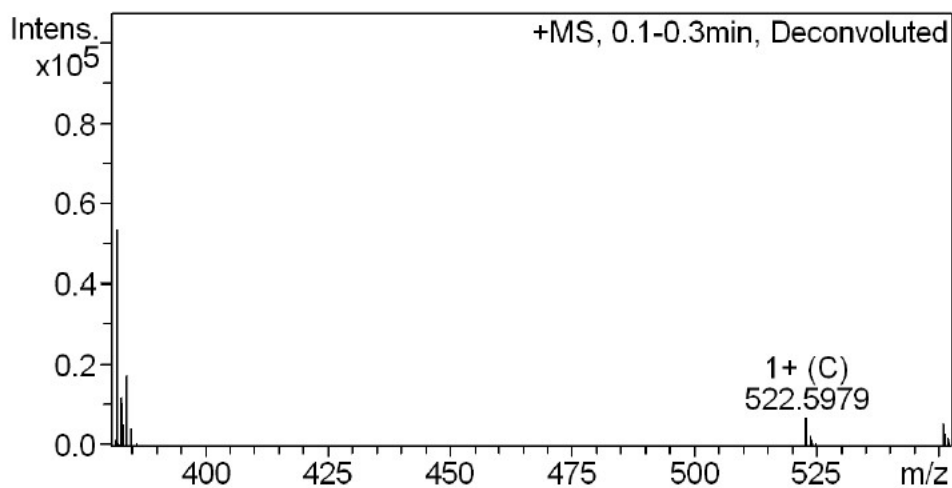

| # | m/z      | Res. | S/N | I     | I%    |
|---|----------|------|-----|-------|-------|
| 1 | 382.1086 |      |     | 56623 | 100.0 |
| 2 | 384.1055 |      |     | 17602 | 31.1  |
| 3 | 522.5979 |      |     | 7201  | 12.7  |
| 4 | 550.6308 |      |     | 6284  | 11.1  |

**Figure S103.** Copy of HRMS ESI analysis of the derivatives **14b**.

**+MS, 0.1-0.1min #(3-8)**

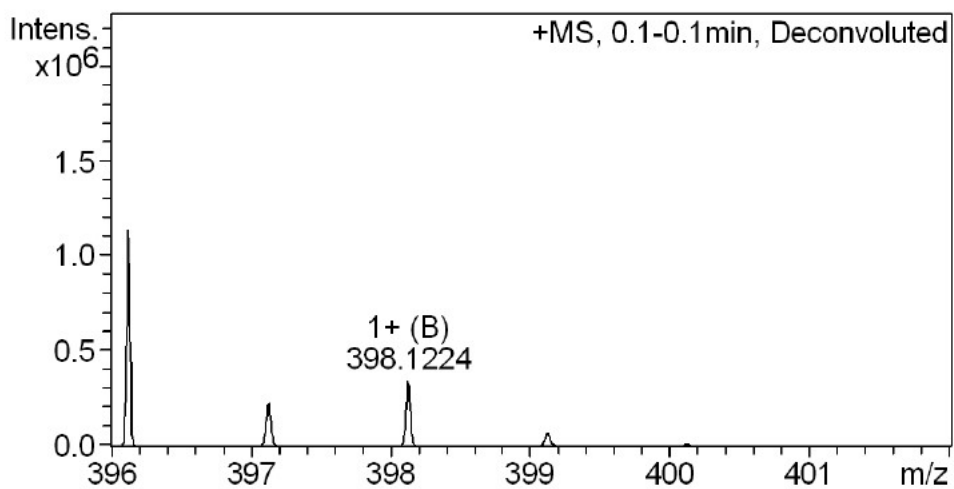

| # | m/z      | Res. | S/N | I       | I %   |
|---|----------|------|-----|---------|-------|
| 1 | 396.1255 |      |     | 1137519 | 100.0 |
| 2 | 398.1224 |      |     | 365607  | 32.1  |

Figure S104. Copy of HRMS ESI analysis of the derivatives 14g.

+MS, 0.0-0.1min #(2-4)

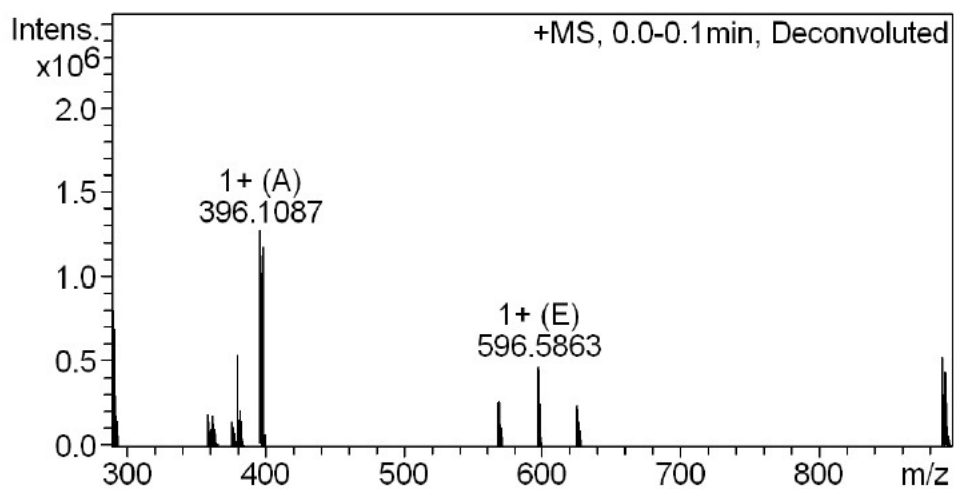

| #  | m/z      | Res. | S/N | I       | I%    |
|----|----------|------|-----|---------|-------|
| 1  | 290.9614 |      |     | 817120  | 64.1  |
| 2  | 359.0622 |      |     | 189521  | 14.9  |
| 3  | 380.1145 |      |     | 548338  | 43.0  |
| 4  | 382.1122 |      |     | 214165  | 16.8  |
| 5  | 396.1087 |      |     | 1274941 | 100.0 |
| 6  | 568.5549 |      |     | 273014  | 21.4  |
| 7  | 596.5863 |      |     | 489719  | 38.4  |
| 8  | 624.6170 |      |     | 244564  | 19.2  |
| 9  | 887.2170 |      |     | 536545  | 42.1  |
| 10 | 889.2124 |      |     | 450347  | 35.3  |

## Copies of HPLC Analysis

**Figure S105.** Copy HPLC analysis of the derivative **3**.

**a** Compound **3** prepared from quinoxaline 1,4-dioxide **2** ( $R_1=H$ ,  $R_2=F$ ) as described in [10]

**b** Compound **3** prepared as described in **Scheme 1**

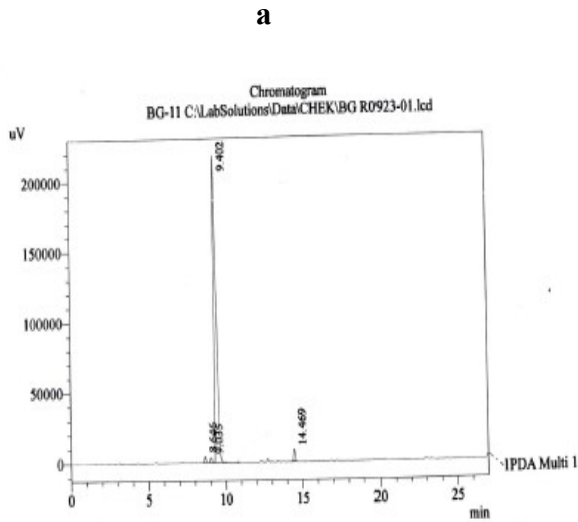

1 PDA Multi 1 / 360nm 4nm

| Peak# | Ret. Time | Area    | Height | Area %  |
|-------|-----------|---------|--------|---------|
| 1     | 8.646     | 31039   | 4329   | 1.252   |
| 2     | 9.035     | 29715   | 3596   | 1.199   |
| 3     | 9.402     | 2359039 | 217226 | 95.148  |
| 4     | 14.469    | 59535   | 8658   | 2.401   |
| Total |           | 2479328 | 233809 | 100.000 |

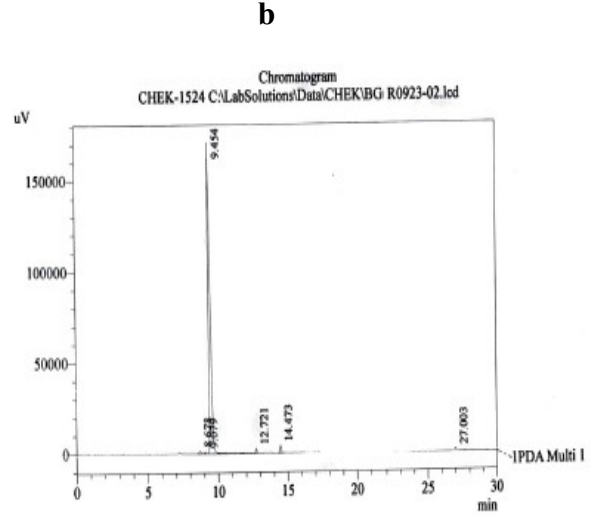

1 PDA Multi 1 / 360nm 4nm

| Peak# | Ret. Time | Area    | Height | Area %  |
|-------|-----------|---------|--------|---------|
| 1     | 8.678     | 12957   | 1614   | 0.735   |
| 2     | 9.079     | 10517   | 1126   | 0.597   |
| 3     | 9.454     | 1681663 | 171300 | 95.395  |
| 4     | 12.721    | 17831   | 2672   | 1.011   |
| 5     | 14.473    | 30036   | 4304   | 1.704   |
| 6     | 27.003    | 9841    | 1284   | 0.558   |
| Total |           | 1762845 | 182300 | 100.000 |

Method Filename : FOS Av.lcm 23.09.2021 12:28:24

| Time  | Unit       | Command | Value |
|-------|------------|---------|-------|
| 0.01  | Pumps      | B.Conc  | 20    |
| 30.00 | Pumps      | B.Conc  | 60    |
| 33.00 | Pumps      | B.Conc  | 20    |
| 45.00 | Controller | Stop    |       |

Method Filename : FOS Av.lcm 23.09.2021 13:18:44

| Time  | Unit       | Command | Value |
|-------|------------|---------|-------|
| 0.01  | Pumps      | B.Conc  | 20    |
| 30.00 | Pumps      | B.Conc  | 60    |
| 33.00 | Pumps      | B.Conc  | 20    |
| 45.00 | Controller | Stop    |       |

Shimadzu LC-20 AD; System - FOS Colon- Kromasil-100-5mkm. C-18, 4,6x250 mm. N 62511  
Elution: A - H3PO4 0,01M pH 2,6; B - MeCN, fl - 1.0 ml/min, loop 20 mkl

Shimadzu LC-20 AD; System - FOS Colon- Kromasil-100-5mkm. C-18, 4,6x250 mm. N 62511  
Elution: A - H3PO4 0,01M pH 2,6; B - MeCN, fl - 1.0 ml/min, loop 20 mkl



Figure S106. Copy HPLC analysis of the derivative 13a.

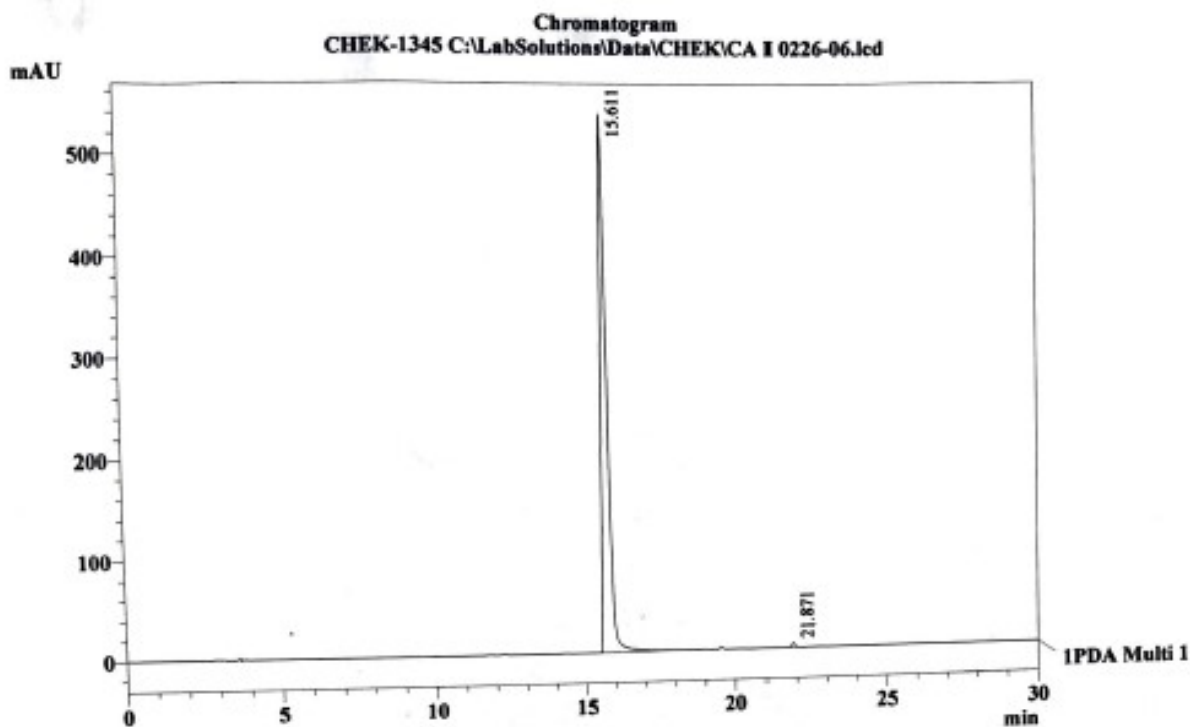

1 PDA Multi 1 / 294nm 4nm

PeakTable

PDA Ch1 294nm 4nm

| Peak# | Ret. Time | Area    | Height | Area %  |
|-------|-----------|---------|--------|---------|
| 1     | 15.611    | 7505673 | 538266 | 99.566  |
| 2     | 21.871    | 32699   | 4659   | 0.434   |
| Total |           | 7538372 | 542925 | 100.000 |

| Method         |            |         |       |
|----------------|------------|---------|-------|
| <<LC Program>> | Unit       | Command | Value |
| Time           | Pumps      | B.Conc  | 15    |
| 0.10           | Pumps      | B.Conc  | 40    |
| 20.00          | Pumps      | B.Conc  | 70    |
| 30.00          | Pumps      | B.Conc  | 15    |
| 33.00          | Pumps      | B.Conc  |       |
| 45.00          | Controller | Stop    |       |

Method Filename : FOS Av.lcm

Shimadzu LC-20AD; 2-System FOS, Colon Kromasil 100-C18, size 5µm, 4,6\*250mm, N 62512  
 Elution: A - H3PO4 0.01M pH 2.6; B - MeCN, fl. 1,0 ml/min, loop 20µl.

Figure S107. Copy HPLC analysis of the derivative 13b.

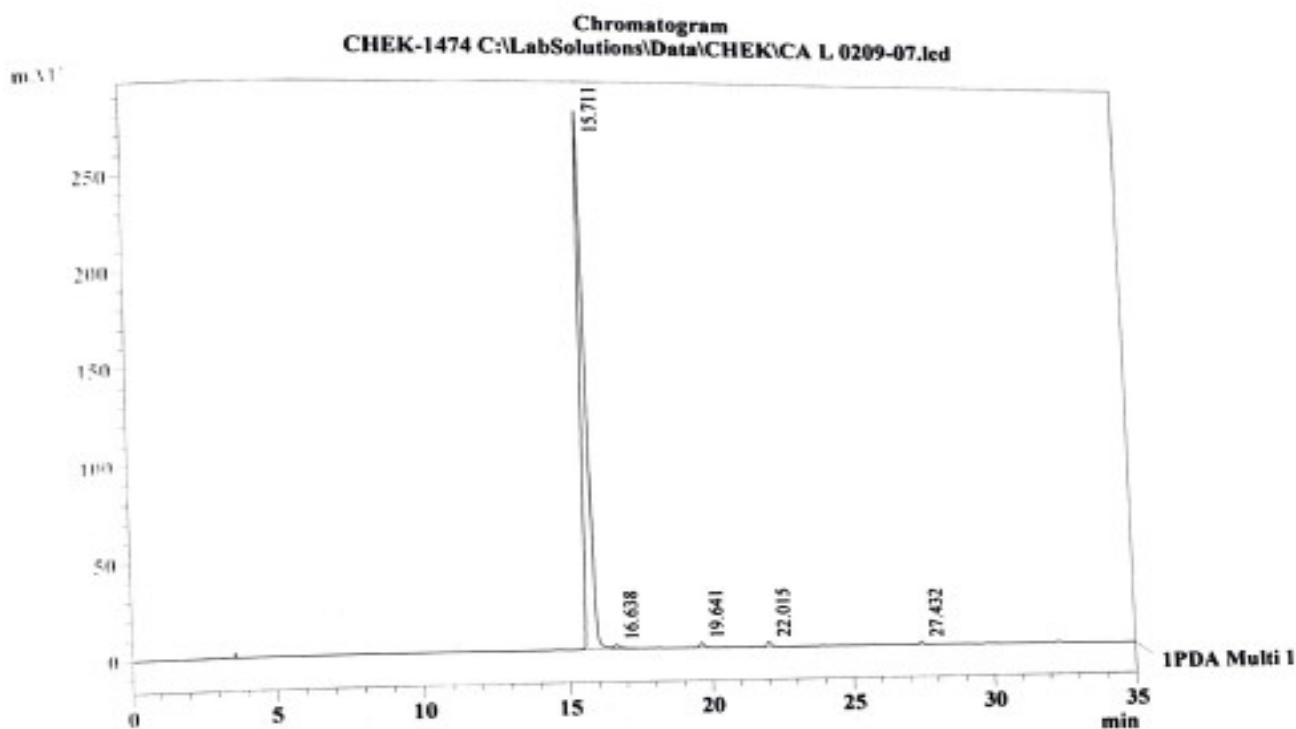

1 PDA Multi 1 / 290nm 4nm

PeakTable

PDA Ch1 290nm 4nm

| Peak # | Ret. Time | Area    | Height | Area %  |
|--------|-----------|---------|--------|---------|
| 1      | 15.711    | 3221582 | 281274 | 97.672  |
| 2      | 16.638    | 16986   | 1511   | 0.515   |
| 3      | 19.641    | 23291   | 2536   | 0.706   |
| 4      | 22.015    | 26181   | 2720   | 0.794   |
| 5      | 27.432    | 10320   | 1551   | 0.313   |
| Total  |           | 3298360 | 289593 | 100.000 |

|                |            | Method  |       |
|----------------|------------|---------|-------|
| <<LC Program>> | Unit       | Command | Value |
| Time           |            | B.Conc  | 15    |
| 0.10           | Pumps      | B.Conc  | 40    |
| 20.00          | Pumps      | B.Conc  | 70    |
| 30.00          | Pumps      | B.Conc  | 15    |
| 33.00          | Pumps      |         |       |
| 45.00          | Controller | Stop    |       |

Method Filename : FOS Av.lcm

Shimadzu LC-20AD; 2-System FOS, Colon Kromasil 100-C18, size 5µm, 4,6\*250mm, N 86912  
 Eluent: A - H3PO4 0.01M pH 2.6; B - MeCN, fl. 1.0 ml/min, loop 20µl.

Figure S108. Copy HPLC analysis of the derivative 13c.

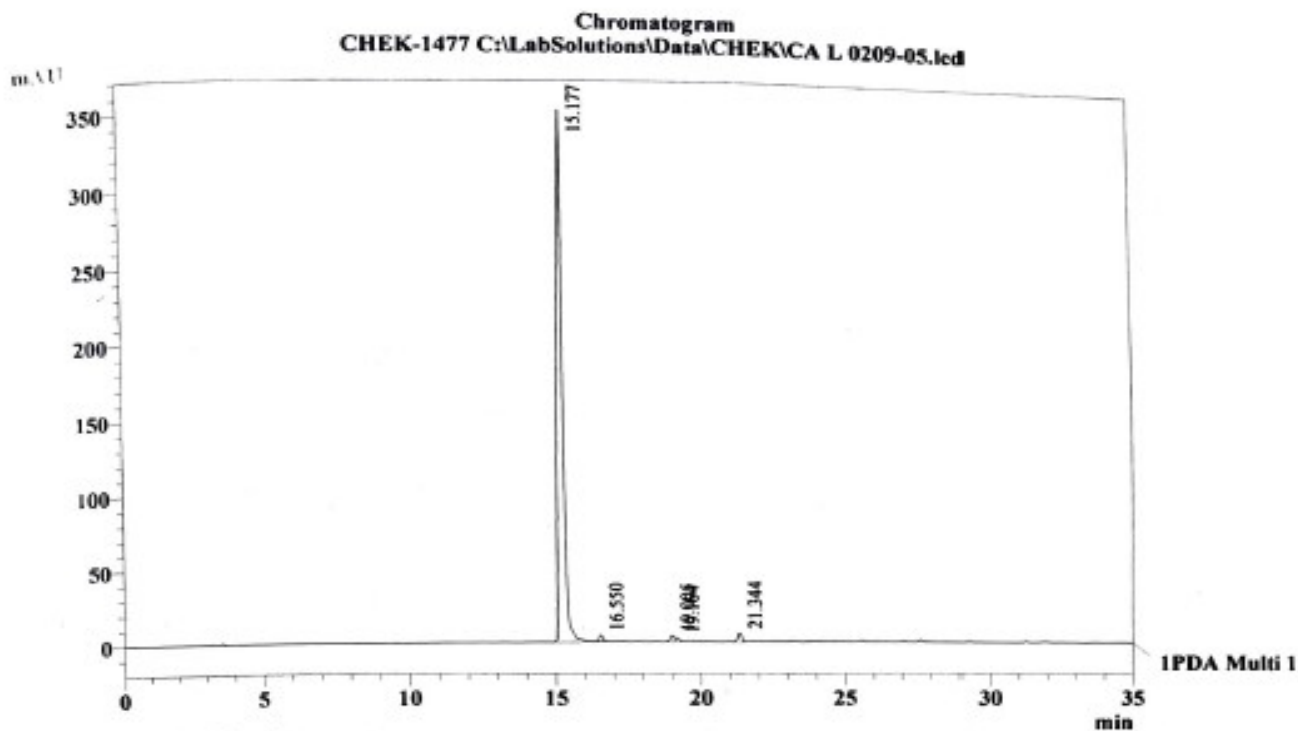

1 PDA Multi 1 / 290nm 4nm

PeakTable

PDA Ch1 290nm 4nm

| Peak# | Ret. Time | Area    | Height | Area %  |
|-------|-----------|---------|--------|---------|
| 1     | 15.177    | 4146836 | 350548 | 96.756  |
| 2     | 16.550    | 32828   | 3927   | 0.766   |
| 3     | 19.005    | 36713   | 3821   | 0.857   |
| 4     | 19.164    | 21933   | 2689   | 0.512   |
| 5     | 21.344    | 47561   | 5519   | 1.110   |
| Total |           | 4285871 | 366503 | 100.000 |

<<LC Program>>

| Time  | Unit       | Command | Value |
|-------|------------|---------|-------|
| 0.10  | Pumps      | B.Conc  | 15    |
| 20.00 | Pumps      | B.Conc  | 40    |
| 30.00 | Pumps      | B.Conc  | 70    |
| 33.00 | Pumps      | B.Conc  | 15    |
| 45.00 | Controller | Stop    |       |

Method Filename : FOS Av.lcm

Shimadzu LC-20AD; 2-System FOS, Colon Kromasil 100-C18, size 5µm, 4,6\*250mm, N 86912  
 Elution: A - H3PO4 0.01M pH 2.6; B - MeCN, fl. 1,0 ml/min, loop 20µl.

Figure S109. Copy HPLC analysis of the derivative 13d.

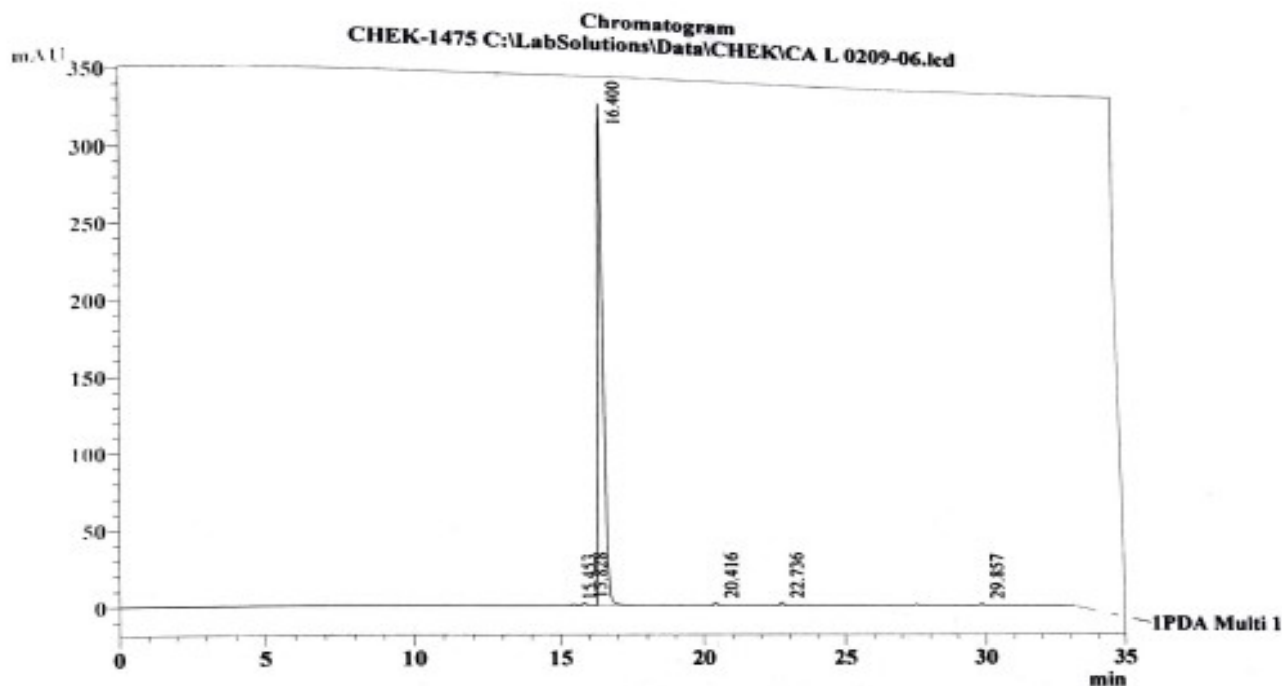

1 PDA Multi 1 / 290nm 4nm

PeakTable

PDA Ch1 290nm 4nm

| Peak# | Ret. Time | Area    | Height | Area %  |
|-------|-----------|---------|--------|---------|
| 1     | 15.453    | 14912   | 1063   | 0.371   |
| 2     | 15.828    | 17387   | 2006   | 0.432   |
| 3     | 16.400    | 3942125 | 332461 | 98.019  |
| 4     | 20.416    | 17626   | 1987   | 0.438   |
| 5     | 22.736    | 18688   | 2134   | 0.465   |
| 6     | 29.857    | 11054   | 1759   | 0.275   |
| Total |           | 4021792 | 341409 | 100.000 |

| <<I.C Program>> |            |         |       |
|-----------------|------------|---------|-------|
| Time            | Unit       | Command | Value |
| 0.10            | Pumps      | B.Conc  | 15    |
| 20.00           | Pumps      | B.Conc  | 40    |
| 30.00           | Pumps      | B.Conc  | 70    |
| 33.00           | Pumps      | B.Conc  | 15    |
| 45.00           | Controller | Stop    |       |

Method Filename : FOS Av.lcm

Shimadzu LC-20AD; 2-System FOS, Colon Kromasil 100-C18, size 5µm, 4,6\*250mm, N 86912  
 Elution: A - H3PO4 0.01M pH 2.6; B - MeCN, fl. 1.0 ml/min, loop 20µl.

Figure S110. Copy HPLC analysis of the derivative 13e.

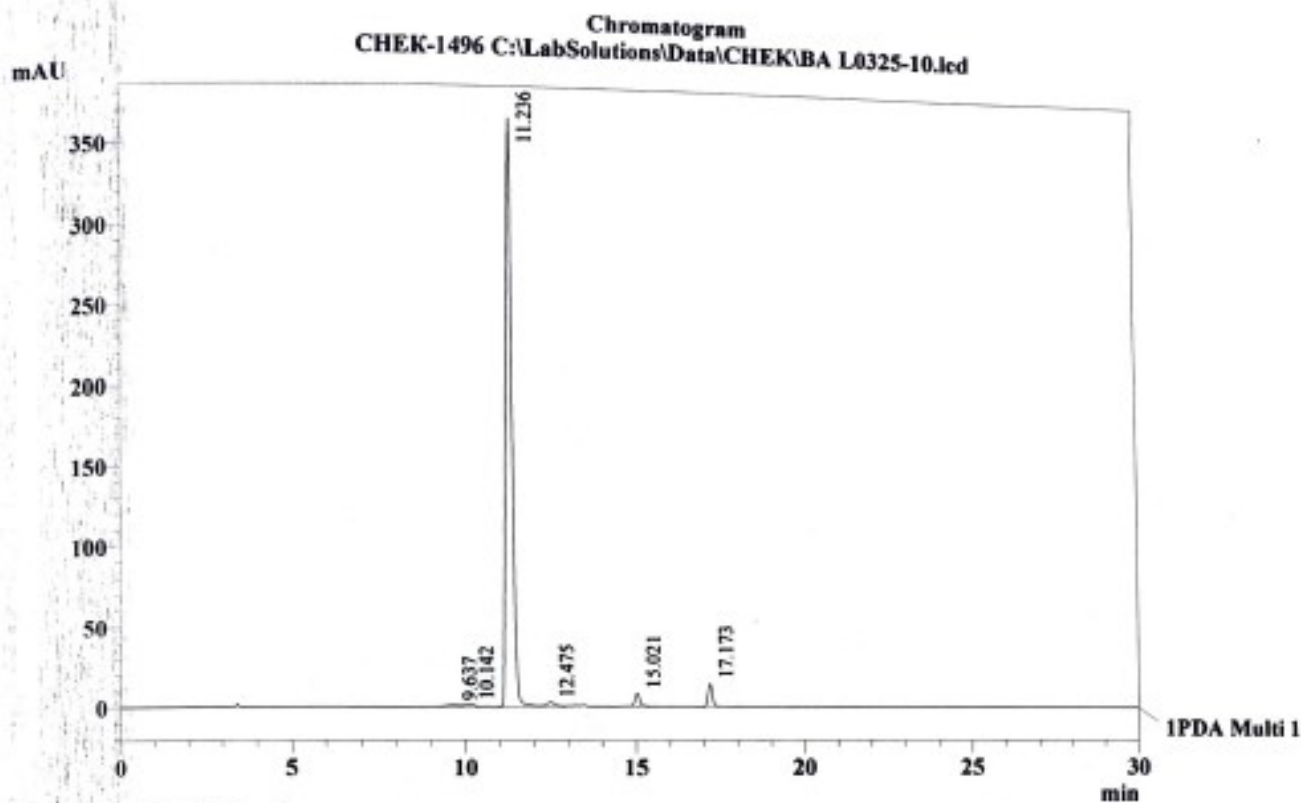

1 PDA Multi 1 / 300nm 4nm

PeakTable

PDA Ch1 300nm 4nm

| Peak# | Ret. Time | Area    | Height | Area %  |
|-------|-----------|---------|--------|---------|
| 1     | 9.637     | 29688   | 989    | 0.609   |
| 2     | 10.142    | 30974   | 1715   | 0.636   |
| 3     | 11.236    | 4550228 | 366255 | 93.362  |
| 4     | 12.475    | 48296   | 2787   | 0.991   |
| 5     | 15.021    | 84025   | 8431   | 1.724   |
| 6     | 17.173    | 130534  | 14623  | 2.678   |
| Total |           | 4873746 | 394799 | 100.000 |

Method

<<LC Program>>

| Time  | Unit       | Command | Value |
|-------|------------|---------|-------|
| 0.10  | Pumps      | B.Conc  | 20    |
| 30.00 | Pumps      | B.Conc  | 60    |
| 33.00 | Pumps      | B.Conc  | 20    |
| 43.00 | Controller | Stop    |       |

Method Filename : FOS Bv.lcm

Shimadzu LC-20AD; 2-System FOS, Colon Kromasil 100-C18, size 5µm, 4,6\*250mm, N 86912  
Elution: A - H3PO4 0.01M pH 2.6; B - MeCN, fl. 1,0 ml/min, loop 20µl.

Figure S111. Copy HPLC analysis of the derivative 13f.

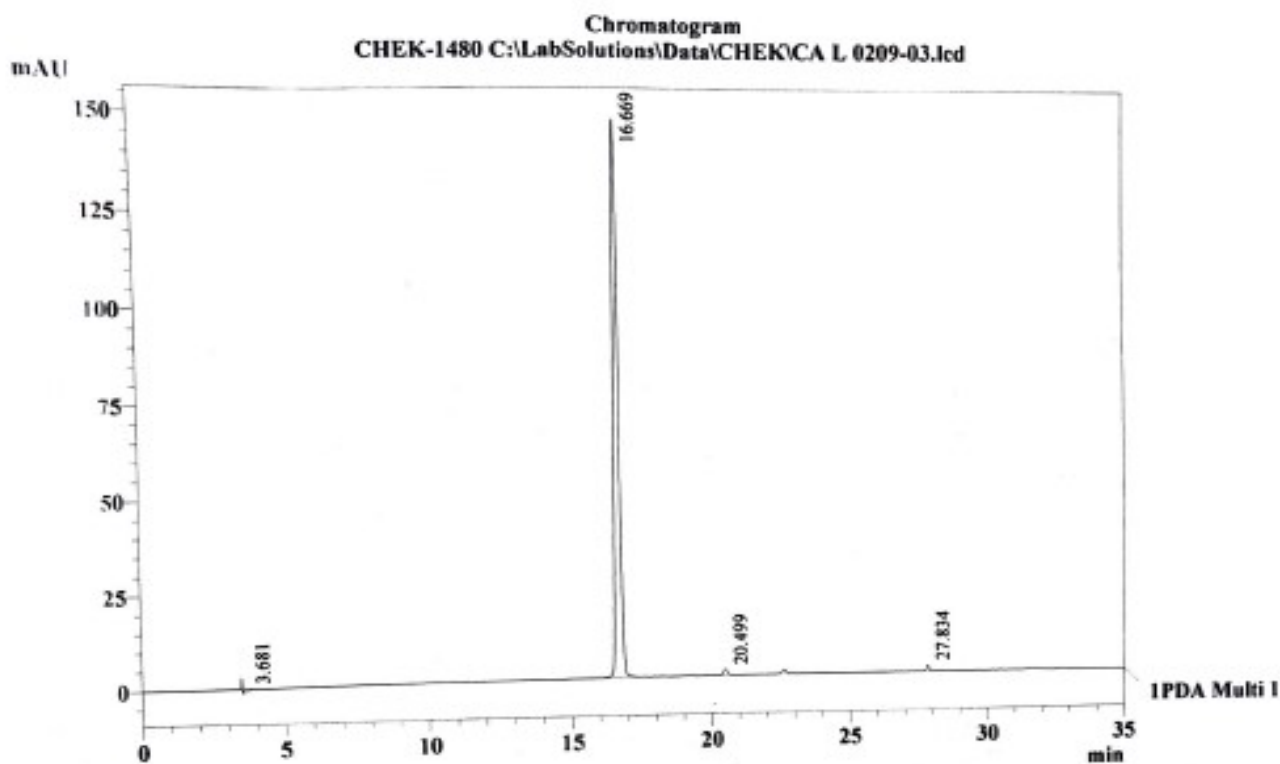

1 PDA Multi I / 290nm 4nm

PeakTable

PDA Ch1 290nm 4nm

| Peak# | Ret. Time | Area    | Height | Area %  |
|-------|-----------|---------|--------|---------|
| 1     | 3.681     | 10073   | 805    | 0.573   |
| 2     | 16.669    | 1723323 | 146937 | 98.044  |
| 3     | 20.499    | 13562   | 1595   | 0.772   |
| 4     | 27.834    | 10753   | 1751   | 0.612   |
| Total |           | 1757712 | 151087 | 100.000 |

|                |            | Method  |       |
|----------------|------------|---------|-------|
| <<LC Program>> | Unit       | Command | Value |
| Time           | Pumps      | B.Conc  | 15    |
| 0.10           | Pumps      | B.Conc  | 40    |
| 20.00          | Pumps      | B.Conc  | 70    |
| 30.00          | Pumps      | B.Conc  | 15    |
| 33.00          | Pumps      | B.Conc  | 15    |
| 45.00          | Controller | Stop    |       |

Method Filename : FOS Av.lem

Shimadzu LC-20AD; 2-System FOS, Colon Kromasil 100-C18, size 5µm, 4,6\*250mm, N 86912  
Elution: A - H3PO4 0.01M pH 2.6; B - MeCN, fl. 1,0 ml/min, loop 20µl.

Figure S112. Copy HPLC analysis of the derivative 13g.

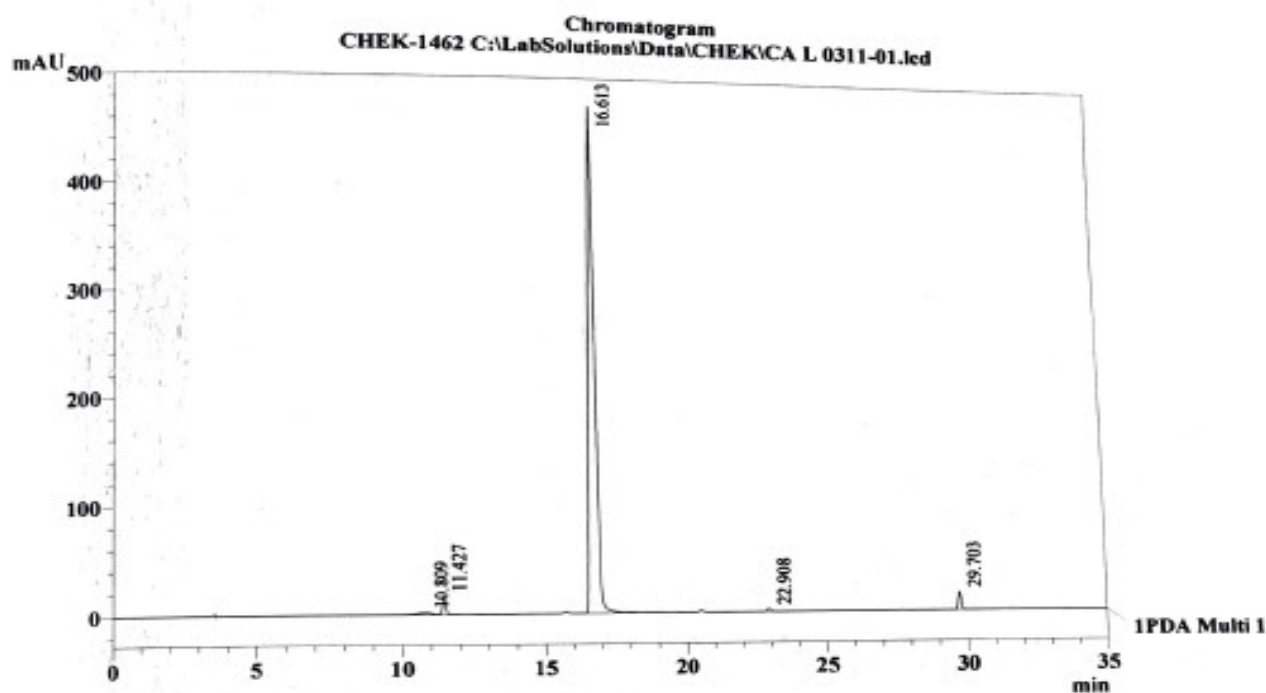

1 PDA Multi 1 / 298nm 4nm

PeakTable

PDA Ch1 298nm 4nm

| Peak# | Ret. Time | Area    | Height | Area %  |
|-------|-----------|---------|--------|---------|
| 1     | 10.809    | 58271   | 1728   | 0.795   |
| 2     | 11.427    | 132338  | 16936  | 1.807   |
| 3     | 16.613    | 7001975 | 473677 | 95.585  |
| 4     | 22.908    | 22119   | 2471   | 0.302   |
| 5     | 29.703    | 110656  | 16629  | 1.511   |
| Total |           | 7325359 | 511440 | 100.000 |

Method

<<LC Program>>

| Time  | Unit       | Command | Value |
|-------|------------|---------|-------|
| 0.10  | Pumps      | B.Conc  | 15    |
| 20.00 | Pumps      | B.Conc  | 40    |
| 30.00 | Pumps      | B.Conc  | 70    |
| 33.00 | Pumps      | B.Conc  | 15    |
| 45.00 | Controller | Stop    |       |

Method Filename : FOS Av.lcm

Shimadzu LC-20AD; 2-System FOS, Colon Kromasil 100-C18, size 5µm, 4,6\*250mm, N 86912  
Elution: A - H<sub>3</sub>PO<sub>4</sub> 0.01M pH 2.6; B - MeCN, fl. 1.0 ml/min, loop 20µl.

Figure S113. Copy HPLC analysis of the derivative 13h.

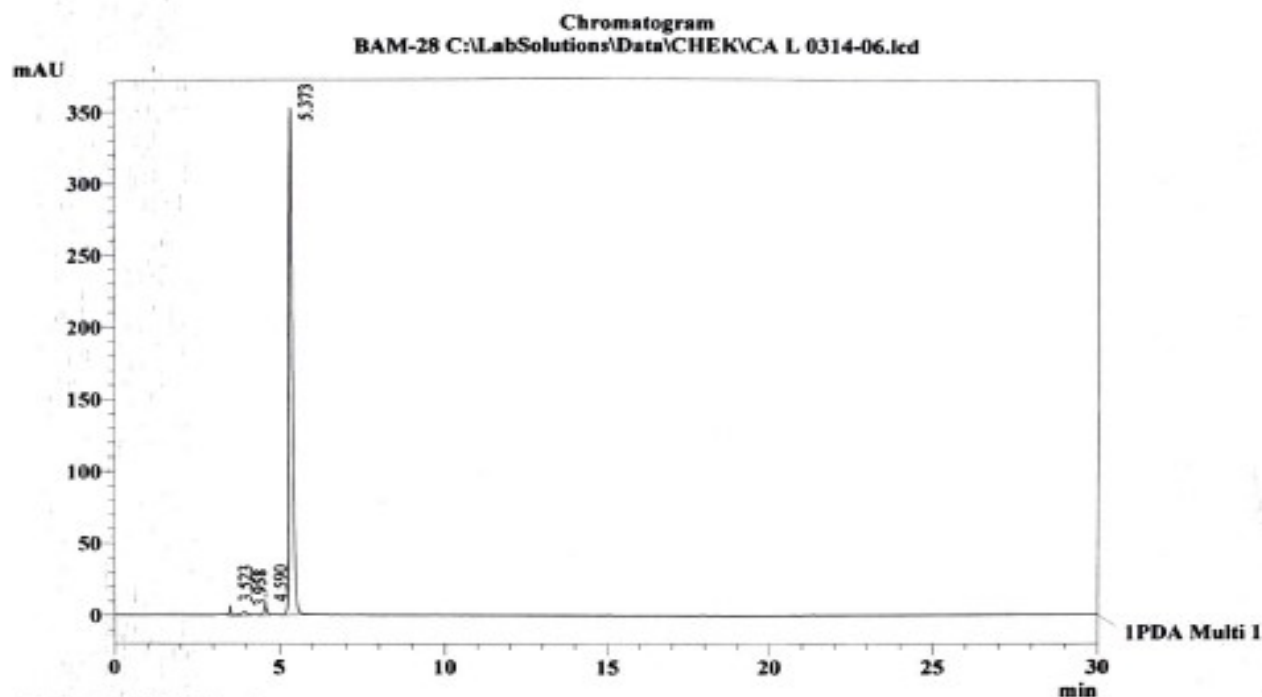

1 PDA Multi I / 335nm 4nm

PeakTable

PDA Ch1 335nm 4nm

| Peak# | Ret. Time | Area    | Height | Area %  |
|-------|-----------|---------|--------|---------|
| 1     | 3.523     | 25023   | 6981   | 0.926   |
| 2     | 3.958     | 39531   | 3345   | 1.463   |
| 3     | 4.590     | 44279   | 6801   | 1.638   |
| 4     | 5.373     | 2593718 | 352686 | 95.973  |
| Total |           | 2702551 | 369814 | 100.000 |

| <<LC Program>> |            | Method  |       |
|----------------|------------|---------|-------|
| Time           | Unit       | Command | Value |
| 0.10           | Pumps      | B.Conc  | 30    |
| 30.00          | Pumps      | B.Conc  | 70    |
| 32.00          | Pumps      | B.Conc  | 30    |
| 43.00          | Controller | Stop    |       |

Method Filename : FOS B.lcm

Shimadzu LC-20AD; 2-System FOS, Colon Kromasil 100-C18, size 5µm, 4,6\*250mm, N 86912  
Elution: A - H<sub>3</sub>PO<sub>4</sub> 0.01M pH 2.6; B - MeCN, fl. 1,0 ml/min, loop 20µl.



Figure S114. Copy HPLC analysis of the derivative 14a.

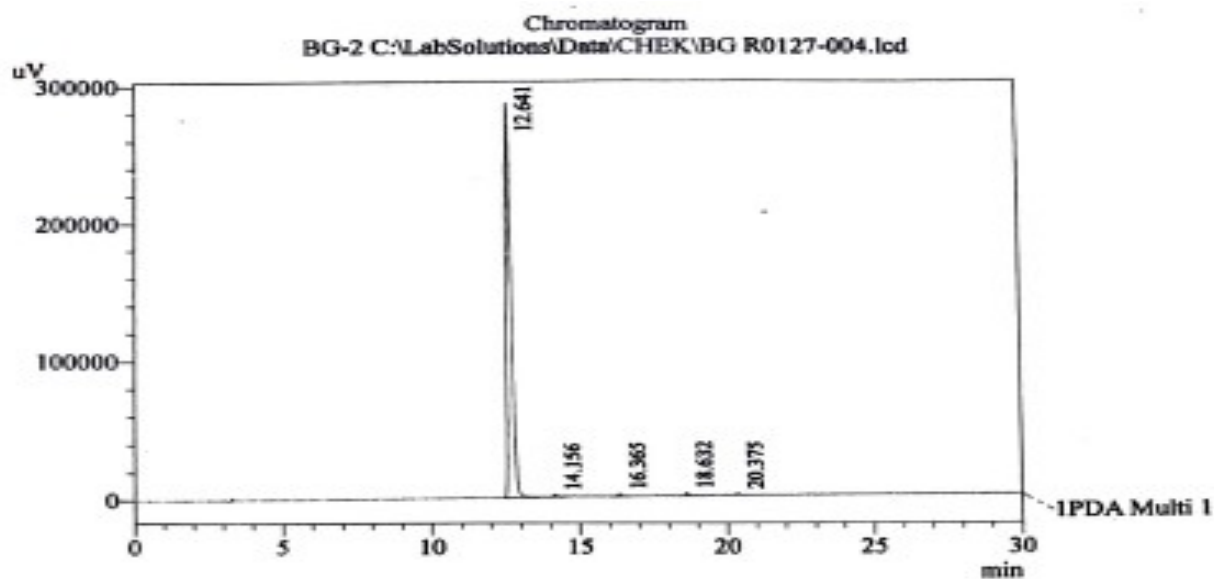

1 PDA Multi 1 / 290nm 4nm  
PDA Ch1 290nm 4nm

| Peak# | Ret. Time | Area    | Height | Area %  |
|-------|-----------|---------|--------|---------|
| 1     | 12.641    | 3308849 | 285189 | 98.464  |
| 2     | 14.156    | 18139   | 1426   | 0.540   |
| 3     | 16.365    | 13052   | 1671   | 0.388   |
| 4     | 18.632    | 16172   | 1987   | 0.481   |
| 5     | 20.375    | 4251    | 1222   | 0.127   |
| Total |           | 3360462 | 291494 | 100.000 |

Method Filename : FOS Av1.lcm 27.01.2021 15:04:11

| Time  | Unit       | Command | Value |
|-------|------------|---------|-------|
| 0.01  | Pumps      | B.Conc  | 20    |
| 30.00 | Pumps      | B.Conc  | 60    |
| 33.00 | Pumps      | B.Conc  | 20    |
| 45.00 | Controller | Stop    |       |

Shimadzu LC-20 AD; System - FOS Colon- Kromasil-100-5µm. C-18, 4,6x250 mm. N 62511  
Elution: A - H3PO4 0,01M pH 2,6; B - MeCN, fl - 1.0 ml/min, loop 20 µl

Figure S115. Copy HPLC analysis of the derivative 14b.

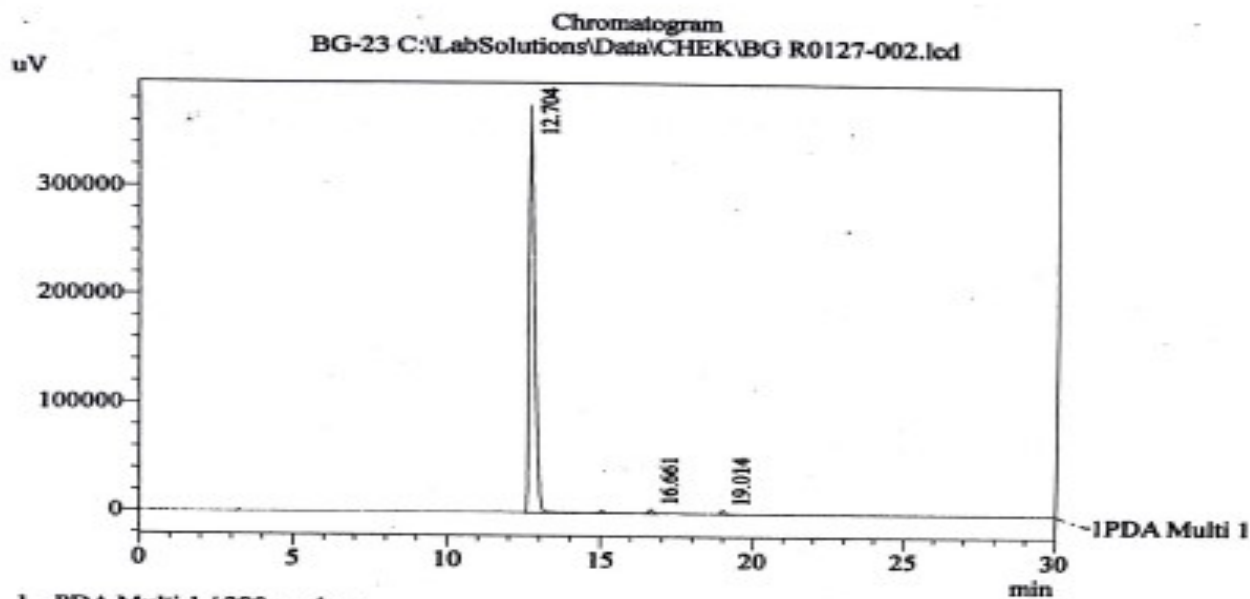

1 PDA Multi 1 / 290nm 4nm

PDA Ch1 290nm 4nm

| Peak# | Ret. Time | Area    | Height | Area %  |
|-------|-----------|---------|--------|---------|
| 1     | 12.704    | 5196493 | 374968 | 98.549  |
| 2     | 16.661    | 38639   | 4417   | 0.733   |
| 3     | 19.014    | 37890   | 4288   | 0.719   |
| Total |           | 5273023 | 383673 | 100.000 |

Method Filename : FOS Av1.lcm 27.01.2021 13:27:12

|       |            |         |       |
|-------|------------|---------|-------|
| Time  | Unit       | Command | Value |
| 0.01  | Pumps      | B.Conc  | 20    |
| 30.00 | Pumps      | B.Conc  | 60    |
| 33.00 | Pumps      | B.Conc  | 20    |
| 45.00 | Controller | Stop    |       |

Shimadzu LC-20 AD; System - FOS Colon- Kromasil-100-5µm. C-18, 4,6x250 mm. N 62511  
Elution: A - H<sub>3</sub>PO<sub>4</sub> 0,01M pH 2,6; B - MeCN, fl - 1.0 ml/min, loop 20 µl

Figure S116. Copy HPLC analysis of the derivative 14g.

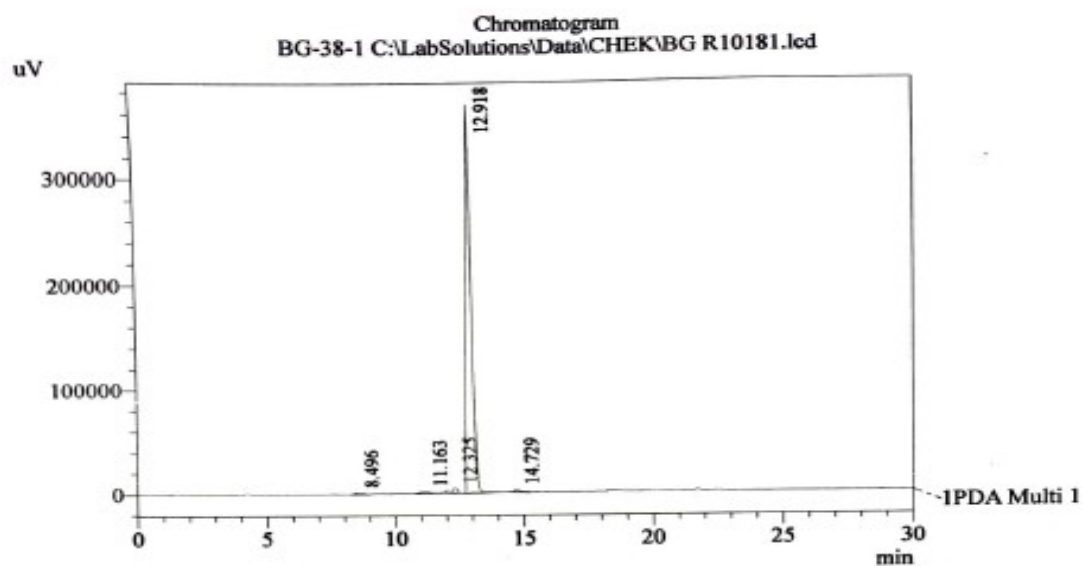

I PDA Multi 1 / 290nm 4nm

PDA Ch1 290nm 4nm

| Peak# | Ret. Time | Area    | Height | Area %  |
|-------|-----------|---------|--------|---------|
| 1     | 8.496     | 26901   | 1561   | 0.485   |
| 2     | 11.163    | 41047   | 1813   | 0.741   |
| 3     | 12.325    | 73221   | 4391   | 1.321   |
| 4     | 12.918    | 5368240 | 367525 | 96.859  |
| 5     | 14.729    | 32935   | 2543   | 0.594   |
| Total |           | 5542343 | 377833 | 100.000 |

Method Filename : FOS Av1.lcm 18.10.2021 15:08:02

| Time  | Unit       | Command | Value |
|-------|------------|---------|-------|
| 0.01  | Pumps      | B.Conc  | 20    |
| 30.00 | Pumps      | B.Conc  | 60    |
| 33.00 | Pumps      | B.Conc  | 20    |
| 45.00 | Controller | Stop    |       |

Shimadzu LC-20 AD; System - FOS Colon- Kromasil-100-5µm. C-18, 4,6x250 mm. N 62511  
Elution: A - H3PO4 0,01M pH 2,6; B - MeCN, fl - 1.0 ml/min, loop 20 µl

**Table S2.** Experimental parameters of aqueous solubility (pH=7) of some derivatives **4a-c**, **13a** and **14a** at 23 °C.

| <b>Compound</b> | <b>Experimental solubility<br/>(mg/mL)</b> |
|-----------------|--------------------------------------------|
| <b>4a*HCl</b>   | 14.3±0.3                                   |
| <b>4b*HCl</b>   | 1.2±0.1                                    |
| <b>4c*HCl</b>   | 0.17±0.02                                  |
| <b>13a*HCl</b>  | 0.9±0.1                                    |
| <b>14a*HCl</b>  | 0.03±0.05                                  |
| <b>14a*MsOH</b> | 0.6±0.1                                    |
